# Supplementary material for: The genome of the golden apple snail Pomacea canaliculata provides insight into stress tolerance and invasive adaptation
Source: PubMed Central journal article supplement (PMC6129957; doi:10.1093/gigascience/giy101), 2018-08-09

# GigaScience

## The genome of golden apple snail *Pomacea canaliculata* provides insight into stress tolerance and invasive adaptation

--Manuscript Draft--

|                                                      |                                                                                                                                                                                                                                                                                                                                                                                                                                                                                                                                                                                                                                                                                                                                                                                                                                                                                                                                                                                                                                                                                                                                                                                                                                                                                                                                                                |            |
|------------------------------------------------------|----------------------------------------------------------------------------------------------------------------------------------------------------------------------------------------------------------------------------------------------------------------------------------------------------------------------------------------------------------------------------------------------------------------------------------------------------------------------------------------------------------------------------------------------------------------------------------------------------------------------------------------------------------------------------------------------------------------------------------------------------------------------------------------------------------------------------------------------------------------------------------------------------------------------------------------------------------------------------------------------------------------------------------------------------------------------------------------------------------------------------------------------------------------------------------------------------------------------------------------------------------------------------------------------------------------------------------------------------------------|------------|
| <b>Manuscript Number:</b>                            | GIGA-D-18-00030R2                                                                                                                                                                                                                                                                                                                                                                                                                                                                                                                                                                                                                                                                                                                                                                                                                                                                                                                                                                                                                                                                                                                                                                                                                                                                                                                                              |            |
| <b>Full Title:</b>                                   | The genome of golden apple snail <i>Pomacea canaliculata</i> provides insight into stress tolerance and invasive adaptation                                                                                                                                                                                                                                                                                                                                                                                                                                                                                                                                                                                                                                                                                                                                                                                                                                                                                                                                                                                                                                                                                                                                                                                                                                    |            |
| <b>Article Type:</b>                                 | Research                                                                                                                                                                                                                                                                                                                                                                                                                                                                                                                                                                                                                                                                                                                                                                                                                                                                                                                                                                                                                                                                                                                                                                                                                                                                                                                                                       |            |
| <b>Funding Information:</b>                          | National key research and development program of China (2016YFC1200600)                                                                                                                                                                                                                                                                                                                                                                                                                                                                                                                                                                                                                                                                                                                                                                                                                                                                                                                                                                                                                                                                                                                                                                                                                                                                                        | Dr Wei Fan |
|                                                      | Shenzhen science and technology program (JCYJ20150630165133395)                                                                                                                                                                                                                                                                                                                                                                                                                                                                                                                                                                                                                                                                                                                                                                                                                                                                                                                                                                                                                                                                                                                                                                                                                                                                                                | Dr Wei Fan |
|                                                      | Fund of Key Laboratory of Shenzhen (ZDSYS20141118170111640)                                                                                                                                                                                                                                                                                                                                                                                                                                                                                                                                                                                                                                                                                                                                                                                                                                                                                                                                                                                                                                                                                                                                                                                                                                                                                                    | Dr Wei Fan |
|                                                      | The Agricultural Science and Technology Innovation Program (ASTIP) of Chinese Academy of Agricultural Sciences(CAAS) & Elite Youth Program of Chinese Academy of Agricultural Sciences                                                                                                                                                                                                                                                                                                                                                                                                                                                                                                                                                                                                                                                                                                                                                                                                                                                                                                                                                                                                                                                                                                                                                                         | Dr Wei Fan |
| <b>Abstract:</b>                                     | <p>Background: The golden apple snail (<i>Pomacea canaliculata</i>) is a fresh water snail listed among the top-100 worst invasive species, worldwide and a noted agricultural and quarantine pest that causes great economic losses. It is characterized by fast growth, strong stress tolerance, a high reproduction rate, and adaptation to a broad range of environments.</p> <p>Results: Here, we used long-read sequencing to produce a 440-Mb high-quality chromosome-level assembly for the <i>P. canaliculata</i> genome. In total, 50 Mb (11.4%) repeat sequences and 21,533 gene models were identified in the genome. The major findings of this study include the recent explosion of DNA/hAT-Charlie transposable elements (TEs), the expansion of the P450 gene family and the constitution of the cellular homeostasis system, which contributes to ecological plasticity in stress adaptation. In addition, the high transcriptional levels of perivitellin genes in the ovary and albumen gland promote the function of nutrient supply and defence ability in eggs. Furthermore, the gut metagenome also contains diverse genes for food digestion and xenobiotic degradation.</p> <p>Conclusions: These findings collectively provide novel insights into the molecular mechanisms of the ecological plasticity and high invasiveness.</p> |            |
| <b>Corresponding Author:</b>                         | Wei Fan<br>Chinese Academy of Agricultural Sciences<br>CHINA                                                                                                                                                                                                                                                                                                                                                                                                                                                                                                                                                                                                                                                                                                                                                                                                                                                                                                                                                                                                                                                                                                                                                                                                                                                                                                   |            |
| <b>Corresponding Author Secondary Information:</b>   |                                                                                                                                                                                                                                                                                                                                                                                                                                                                                                                                                                                                                                                                                                                                                                                                                                                                                                                                                                                                                                                                                                                                                                                                                                                                                                                                                                |            |
| <b>Corresponding Author's Institution:</b>           | Chinese Academy of Agricultural Sciences                                                                                                                                                                                                                                                                                                                                                                                                                                                                                                                                                                                                                                                                                                                                                                                                                                                                                                                                                                                                                                                                                                                                                                                                                                                                                                                       |            |
| <b>Corresponding Author's Secondary Institution:</b> |                                                                                                                                                                                                                                                                                                                                                                                                                                                                                                                                                                                                                                                                                                                                                                                                                                                                                                                                                                                                                                                                                                                                                                                                                                                                                                                                                                |            |
| <b>First Author:</b>                                 | Conghui Liu                                                                                                                                                                                                                                                                                                                                                                                                                                                                                                                                                                                                                                                                                                                                                                                                                                                                                                                                                                                                                                                                                                                                                                                                                                                                                                                                                    |            |
| <b>First Author Secondary Information:</b>           |                                                                                                                                                                                                                                                                                                                                                                                                                                                                                                                                                                                                                                                                                                                                                                                                                                                                                                                                                                                                                                                                                                                                                                                                                                                                                                                                                                |            |
| <b>Order of Authors:</b>                             | Conghui Liu                                                                                                                                                                                                                                                                                                                                                                                                                                                                                                                                                                                                                                                                                                                                                                                                                                                                                                                                                                                                                                                                                                                                                                                                                                                                                                                                                    |            |
|                                                      | Yan Zhang                                                                                                                                                                                                                                                                                                                                                                                                                                                                                                                                                                                                                                                                                                                                                                                                                                                                                                                                                                                                                                                                                                                                                                                                                                                                                                                                                      |            |
|                                                      | Yuwei Ren                                                                                                                                                                                                                                                                                                                                                                                                                                                                                                                                                                                                                                                                                                                                                                                                                                                                                                                                                                                                                                                                                                                                                                                                                                                                                                                                                      |            |
|                                                      | Hengchao Wang                                                                                                                                                                                                                                                                                                                                                                                                                                                                                                                                                                                                                                                                                                                                                                                                                                                                                                                                                                                                                                                                                                                                                                                                                                                                                                                                                  |            |
|                                                      | Shuqu Li                                                                                                                                                                                                                                                                                                                                                                                                                                                                                                                                                                                                                                                                                                                                                                                                                                                                                                                                                                                                                                                                                                                                                                                                                                                                                                                                                       |            |

|                                                |                                                                                                                                                                                                                                                                                                                                                                                                                                                                                                                                                                                                                                                                                                                                                                                                                                                                                                                                                                                                                                                                                                                                                                                                                                                                                                                                                                                                                                                                                                                                                                                                                                                                                                                                                                                                                                                                                                                                                                                                                                                                                                                                                                                                                                                                                                                                                                                                                                                                                                                                                                                                                                                                                                                                                                                                                                                                                                                                                                                                                                                                                                                                                                                                                                                                                                                                                                                                                                                                                                                                                                                                                                                                                                                                                                                                                                                                                                                                                                      |
|------------------------------------------------|----------------------------------------------------------------------------------------------------------------------------------------------------------------------------------------------------------------------------------------------------------------------------------------------------------------------------------------------------------------------------------------------------------------------------------------------------------------------------------------------------------------------------------------------------------------------------------------------------------------------------------------------------------------------------------------------------------------------------------------------------------------------------------------------------------------------------------------------------------------------------------------------------------------------------------------------------------------------------------------------------------------------------------------------------------------------------------------------------------------------------------------------------------------------------------------------------------------------------------------------------------------------------------------------------------------------------------------------------------------------------------------------------------------------------------------------------------------------------------------------------------------------------------------------------------------------------------------------------------------------------------------------------------------------------------------------------------------------------------------------------------------------------------------------------------------------------------------------------------------------------------------------------------------------------------------------------------------------------------------------------------------------------------------------------------------------------------------------------------------------------------------------------------------------------------------------------------------------------------------------------------------------------------------------------------------------------------------------------------------------------------------------------------------------------------------------------------------------------------------------------------------------------------------------------------------------------------------------------------------------------------------------------------------------------------------------------------------------------------------------------------------------------------------------------------------------------------------------------------------------------------------------------------------------------------------------------------------------------------------------------------------------------------------------------------------------------------------------------------------------------------------------------------------------------------------------------------------------------------------------------------------------------------------------------------------------------------------------------------------------------------------------------------------------------------------------------------------------------------------------------------------------------------------------------------------------------------------------------------------------------------------------------------------------------------------------------------------------------------------------------------------------------------------------------------------------------------------------------------------------------------------------------------------------------------------------------------------------|
|                                                | Fan Jiang                                                                                                                                                                                                                                                                                                                                                                                                                                                                                                                                                                                                                                                                                                                                                                                                                                                                                                                                                                                                                                                                                                                                                                                                                                                                                                                                                                                                                                                                                                                                                                                                                                                                                                                                                                                                                                                                                                                                                                                                                                                                                                                                                                                                                                                                                                                                                                                                                                                                                                                                                                                                                                                                                                                                                                                                                                                                                                                                                                                                                                                                                                                                                                                                                                                                                                                                                                                                                                                                                                                                                                                                                                                                                                                                                                                                                                                                                                                                                            |
|                                                | Lijuan Yin                                                                                                                                                                                                                                                                                                                                                                                                                                                                                                                                                                                                                                                                                                                                                                                                                                                                                                                                                                                                                                                                                                                                                                                                                                                                                                                                                                                                                                                                                                                                                                                                                                                                                                                                                                                                                                                                                                                                                                                                                                                                                                                                                                                                                                                                                                                                                                                                                                                                                                                                                                                                                                                                                                                                                                                                                                                                                                                                                                                                                                                                                                                                                                                                                                                                                                                                                                                                                                                                                                                                                                                                                                                                                                                                                                                                                                                                                                                                                           |
|                                                | Xi Qiao                                                                                                                                                                                                                                                                                                                                                                                                                                                                                                                                                                                                                                                                                                                                                                                                                                                                                                                                                                                                                                                                                                                                                                                                                                                                                                                                                                                                                                                                                                                                                                                                                                                                                                                                                                                                                                                                                                                                                                                                                                                                                                                                                                                                                                                                                                                                                                                                                                                                                                                                                                                                                                                                                                                                                                                                                                                                                                                                                                                                                                                                                                                                                                                                                                                                                                                                                                                                                                                                                                                                                                                                                                                                                                                                                                                                                                                                                                                                                              |
|                                                | Guojie Zhang                                                                                                                                                                                                                                                                                                                                                                                                                                                                                                                                                                                                                                                                                                                                                                                                                                                                                                                                                                                                                                                                                                                                                                                                                                                                                                                                                                                                                                                                                                                                                                                                                                                                                                                                                                                                                                                                                                                                                                                                                                                                                                                                                                                                                                                                                                                                                                                                                                                                                                                                                                                                                                                                                                                                                                                                                                                                                                                                                                                                                                                                                                                                                                                                                                                                                                                                                                                                                                                                                                                                                                                                                                                                                                                                                                                                                                                                                                                                                         |
|                                                | Wanqiang Qian                                                                                                                                                                                                                                                                                                                                                                                                                                                                                                                                                                                                                                                                                                                                                                                                                                                                                                                                                                                                                                                                                                                                                                                                                                                                                                                                                                                                                                                                                                                                                                                                                                                                                                                                                                                                                                                                                                                                                                                                                                                                                                                                                                                                                                                                                                                                                                                                                                                                                                                                                                                                                                                                                                                                                                                                                                                                                                                                                                                                                                                                                                                                                                                                                                                                                                                                                                                                                                                                                                                                                                                                                                                                                                                                                                                                                                                                                                                                                        |
|                                                | Bo Liu                                                                                                                                                                                                                                                                                                                                                                                                                                                                                                                                                                                                                                                                                                                                                                                                                                                                                                                                                                                                                                                                                                                                                                                                                                                                                                                                                                                                                                                                                                                                                                                                                                                                                                                                                                                                                                                                                                                                                                                                                                                                                                                                                                                                                                                                                                                                                                                                                                                                                                                                                                                                                                                                                                                                                                                                                                                                                                                                                                                                                                                                                                                                                                                                                                                                                                                                                                                                                                                                                                                                                                                                                                                                                                                                                                                                                                                                                                                                                               |
|                                                | Wei Fan                                                                                                                                                                                                                                                                                                                                                                                                                                                                                                                                                                                                                                                                                                                                                                                                                                                                                                                                                                                                                                                                                                                                                                                                                                                                                                                                                                                                                                                                                                                                                                                                                                                                                                                                                                                                                                                                                                                                                                                                                                                                                                                                                                                                                                                                                                                                                                                                                                                                                                                                                                                                                                                                                                                                                                                                                                                                                                                                                                                                                                                                                                                                                                                                                                                                                                                                                                                                                                                                                                                                                                                                                                                                                                                                                                                                                                                                                                                                                              |
| <b>Order of Authors Secondary Information:</b> |                                                                                                                                                                                                                                                                                                                                                                                                                                                                                                                                                                                                                                                                                                                                                                                                                                                                                                                                                                                                                                                                                                                                                                                                                                                                                                                                                                                                                                                                                                                                                                                                                                                                                                                                                                                                                                                                                                                                                                                                                                                                                                                                                                                                                                                                                                                                                                                                                                                                                                                                                                                                                                                                                                                                                                                                                                                                                                                                                                                                                                                                                                                                                                                                                                                                                                                                                                                                                                                                                                                                                                                                                                                                                                                                                                                                                                                                                                                                                                      |
| <b>Response to Reviewers:</b>                  | <p>Reviewer reports:</p> <p>Reviewer #1: Still there are some typos in the revised manuscript. For example, in line 181 "Pintada" must be "Pinctada". Please carefully check the manuscript again before submission.</p> <p>Reply: We have revised all the typos in the manuscript. We revised "Lottia gigantea" to "Lottia gigantea" in line 161, "Pintada fucata" to "Pinctada fucata" in line 162, "giganta" to "gigantea" in line 166, "orthfinder" to "orthoFinder" in line 169, "L. fortune" to "L. fortunei" in line 172, "L. gigantea" to "L. gigantea" in line 259, "Lottia gigantea" to "Lottia gigantea" in line 462, "Pintada fucata" to "Pinctada fucata" in line 463, "giganta" to "gigantea" in line 476, "L. fortune" to "L. fortunei" in line 543, "L. gigantea, Lottia gigantea" to "L. gigantea, Lottia gigantea" in line 543, "L. gigantea" to "L. gigantea" in Table 1, "L. gigantea" to "L. gigantea" in the legend of Figure 4.</p> <p>Reviewer #3: Dear authors,</p> <p>Thank you for providing a revised version of the manuscript and for addressing my suggestions. I think this manuscript will be a great contribution for the genomic studies of mollusks and invasive species. I, however, still have a few comments.</p> <p>1-) The written English is much improved, but there are still a few persistent mistakes. Such as "L. gigantea" where it should be 'L. gigantea' and the same with "L. fortune" which is actually 'L. fortunei'.</p> <p>Reply: We have revised "L. gigantea" to "L. gigantea", and "L. fortune" to "L. fortunei" in the manuscript. We revised "Lottia gigantea" to "Lottia gigantea" in line 161, "giganta" to "gigantea" in line 166, "L. fortune" to "L. fortunei" in line 172, "L. gigantea" to "L. gigantea" in line 259, "Lottia gigantea" to "Lottia gigantea" in line 462, "giganta" to "gigantea" in line 476, "L. fortune" to "L. fortunei" in line 543, "L. gigantea, Lottia gigantea" to "L. gigantea, Lottia gigantea" in line 543, "L. gigantea" to "L. gigantea" in Table 1, "L. gigantea" to "L. gigantea" in the legend of Figure 4.</p> <p>I've attached again a manuscript with some purple highlights of critical pieces of text that should be revised. For example, the sentence between lines 479-484 is too long and non-technical. The same for "With its easy acquisition" in line 377. The improvement of such sentences would greatly benefit the manuscript readers.</p> <p>Reply: (1) The long and non-technical sentence between lines 479-484 "Raw reads were cleaned to exclude adapter sequences, low-quality sequences, and contaminated DNA. The adapter sequence was identified and trimmed from the reads by an ungapped dynamic programming algorithm; the low-quality part (head or tail) of the reads was trimmed off to ensure that the average error rate of the remaining reads was lower than 0.001; the reads that were mapped to contaminated DNA by BWA-MEM were filtered out..." has been revised to short sentences, with the non-technical description removed and the applied in-house program cited:<br/> "The Illumina raw reads were filtered by trimming the adapter sequence and low-quality regions (<a href="https://github.com/fanagislab/common_use">https://github.com/fanagislab/common_use</a>), resulting in high-quality reads with an average error rate &lt; 0.001. Then, the reads mapped to the following genomes by BWA-MEM were filtered out (<a href="https://github.com/fanagislab/metagenome_analysis.git">https://github.com/fanagislab/metagenome_analysis.git</a>), to exclude the contaminated host, food, parasite, and human DNA sequences ..."</p> <p>(2) The "With its easy acquisition" in line 377 has been revised to "With wide distribution", and the whole sentence became: "With wide distribution, rapid growth and efficient reproduction, P. canaliculata possesses the potential to be a model organism</p> |

of Mollusca.”

(3) The “orthologue groups” in line 170 has been revised to “orthologous groups”.

(4) The “maintains” in line 238 has been revised to “contributes to”, and the whole sentence became: “Apoptosis is a process of cell death when sensing stress, and the regulation of apoptosis contributes to the dynamic homeostasis of the internal environment.”

(5) The sentence between lines 319-322 “The gut microbiome is well known as the second genome of animals and plays important roles in food digestion, immune defence, and other processes that are essential to the animal host. To investigate whether the gut microbiome influences the invasive lifestyle” has been improved to: “The gut microbiome is regarded as the “second genome” of the host animal, due to the fact that the gut microbiota contributes to the food digestion, immune system development, and many other processes important to the host. To investigate the relationship between the gut microbiome and the invasive lifestyle of *P. canaliculata*.”

Also, the final subtopic should not be "Conclusion and Discussion", at that point, I would say, its time to just conclude.

Reply: We have deleted “and Discussion” in the subtopic.

In the results sections, however, many paragraphs start with a discussion of the literature instead of presenting the results: I would advice to revise those, present results first in the paragraphs and then discuss them. Again, coherence benefit readers a great deal.

Reply: Yes, we agree that results should be presented in front of discussion. To make it easier to understand for the readers, the sentences in the head of these paragraphs are brief background information, not discussion on the results. Real discussions are put after the results, in the end of the paragraphs.

2-) The amount of data generated is one of the strongest points of the work presented. And specially because of that, a great deal of analysis can be performed. For example, as you have 60x coverage of PacBio data for the snail, I would suggest running the Falcon and Falcon-Unzip pipeline to actually phase the genome: separate the haplotypes, instead of trying to merge or just through away the variation, as described in lines 424-432. The high heterozygosity described for the species actually helps in the phasing of haplotypes: there are several manuscripts describing methods to do so. I would run FALCON and FALCON-unzip, then I would polish with Illumina and try filling gaps with it in the different haplotypes and then would use the Hi-C data. I know its a great deal of analysis and highly experimental, so I'll leave it as a suggestion. But I would be interested in having a supplementary material with the imperfect alternate contigs generated by the phasing. This is the kind of information that were almost impossible to obtain with the generation of short reads, but now the long-reads technologies allow us to phase some long genome portions, and this is a very valuable information to some of us. With that, we can start understanding how much variation there are - and what are their evolutionary implications - in coding and non-coding regions within a genome.

Reply: Assembly the two haplotype chromosomes with long-reads is a very good suggestion, and we agree that the phased chromosomal sequences have greater value than the current mosaic reference genome sequence. In fact, we have run both SMARTdenovo and Falcon/Falcon-unzip, and polished by Pilon with illumina reads. The biggest difference of SMARTdenovo from Falcon is that SMRTdenovo does not need to correct sequencing errors in the first step, but instead perform an overlap-layout-consensus algorithm directly. With algorithms improved in many aspects, SMARTdenovo can achieve good assembly results with moderate sequencing coverage (50 X), in contrast, Falcon usually needs higher sequencing coverage ( 100 X) to get a good assembly. In this study, using the 60 X apple snail Pacbio data, SMARTdenovo generates contigs with N50 length over 1 megabases, which is 4 times of that of Falcon/Falcon-unzip (240 Kb).

|                                                                                                                                                                                                                                                                                                                                                                                                                                    |                                                                                                                                                                                                                                                                                                                                                                                                                                                                                                                                                                                                                                                                                                                                                                                                                                                                                                                                                                                                                                                                                                                                                                                                                                                                                                                                                                                                                                                                                                                                                                                                                                                                                                                                                                                                                                                                                                                                                                                                                                                                                                                                                                                                                                                                                                                                                                                                                                                                                    |
|------------------------------------------------------------------------------------------------------------------------------------------------------------------------------------------------------------------------------------------------------------------------------------------------------------------------------------------------------------------------------------------------------------------------------------|------------------------------------------------------------------------------------------------------------------------------------------------------------------------------------------------------------------------------------------------------------------------------------------------------------------------------------------------------------------------------------------------------------------------------------------------------------------------------------------------------------------------------------------------------------------------------------------------------------------------------------------------------------------------------------------------------------------------------------------------------------------------------------------------------------------------------------------------------------------------------------------------------------------------------------------------------------------------------------------------------------------------------------------------------------------------------------------------------------------------------------------------------------------------------------------------------------------------------------------------------------------------------------------------------------------------------------------------------------------------------------------------------------------------------------------------------------------------------------------------------------------------------------------------------------------------------------------------------------------------------------------------------------------------------------------------------------------------------------------------------------------------------------------------------------------------------------------------------------------------------------------------------------------------------------------------------------------------------------------------------------------------------------------------------------------------------------------------------------------------------------------------------------------------------------------------------------------------------------------------------------------------------------------------------------------------------------------------------------------------------------------------------------------------------------------------------------------------------------|
|                                                                                                                                                                                                                                                                                                                                                                                                                                    | <p>The comparison between SMARTdenovo and Falcon/Falcon-unzip assemblies showed that contigs assembled by SMARTdenovo had the assembly size of 473.04 Mb, N50 size of 1010.40 Kb and N90 size of 172.34 Kb; primary contigs assembled by Falcon had the assembly size of 475.28 Mb, N50 size of 241.14 Kb and N90 size of 54.29 Kb; alternate contigs assembled by Falcon had the assembly size of 54.10 Mb, N50 size of 43.88 Kb and N90 size of 22.68 Kb; primary contigs assembled by Falcon-unzip had the assembly size of 474.23 Mb, N50 size of 246.62 Kb and N90 size of 58.36 Kb; haplotigs assembled by Falcon-unzip had the assembly size of 173.15 Mb, N50 size of 48.98 Kb and N90 size of 17.44 Kb.</p> <p>Considering that Hi-C contains extremely long-range linkage information, the larger contig length is an import factor for the success application of Hi-C data for scaffolding. Therefore, we adopted the SMARTdenovo contigs and then applied Hi-C to get a chromosomal-scale scaffold sequence.</p> <p>To make the phasing information available to the public, we also uploaded the SMARTdenovo alternate sequences excluded from the reference haploid genome sequence, as well as the Falcon-unzip assembly of the apple snail, to the GigaDB and our institution's ftp-site, respectively.</p> <p>3-) About the expansions found between the snail and <i>L. fortunei</i>, could you please describe the methodology used to consider genes expanded in these two groups? Was this done in a comparative manner with other species? Which ones? What was the criteria to consider gene families expanded?</p> <p>Reply: we added the sentence at method part "To identify the common expanded gene families, we compared the <i>P. canaliculata</i> and <i>L. fortunei</i> with other seven species. The gene number of orthologous group in <i>P. canaliculata</i> and <i>L. fortunei</i> were two or more times than that in all of other species, respectively. Additionally, these gene families with P-value less than 0.01 were considered as expansion by z-test."</p> <p>3a-) Have you identified CPYs expanded in both invasive species? I would suggest that <i>L. fortunei</i> should be included in figure 4.</p> <p>Reply: We have identified the CYP genes in the <i>L. fortunei</i> in the revised manuscript, which were included in Figure 4a. There were 115 CYP genes found in <i>L. fortunei</i>, with no obvious expansion.</p> |
| <b>Additional Information:</b>                                                                                                                                                                                                                                                                                                                                                                                                     |                                                                                                                                                                                                                                                                                                                                                                                                                                                                                                                                                                                                                                                                                                                                                                                                                                                                                                                                                                                                                                                                                                                                                                                                                                                                                                                                                                                                                                                                                                                                                                                                                                                                                                                                                                                                                                                                                                                                                                                                                                                                                                                                                                                                                                                                                                                                                                                                                                                                                    |
| <b>Question</b>                                                                                                                                                                                                                                                                                                                                                                                                                    | <b>Response</b>                                                                                                                                                                                                                                                                                                                                                                                                                                                                                                                                                                                                                                                                                                                                                                                                                                                                                                                                                                                                                                                                                                                                                                                                                                                                                                                                                                                                                                                                                                                                                                                                                                                                                                                                                                                                                                                                                                                                                                                                                                                                                                                                                                                                                                                                                                                                                                                                                                                                    |
| Are you submitting this manuscript to a special series or article collection?                                                                                                                                                                                                                                                                                                                                                      | No                                                                                                                                                                                                                                                                                                                                                                                                                                                                                                                                                                                                                                                                                                                                                                                                                                                                                                                                                                                                                                                                                                                                                                                                                                                                                                                                                                                                                                                                                                                                                                                                                                                                                                                                                                                                                                                                                                                                                                                                                                                                                                                                                                                                                                                                                                                                                                                                                                                                                 |
| <p><b>Experimental design and statistics</b></p> <p>Full details of the experimental design and statistical methods used should be given in the Methods section, as detailed in our <a href="#">Minimum Standards Reporting Checklist</a>. Information essential to interpreting the data presented should be made available in the figure legends.</p> <p>Have you included all the information requested in your manuscript?</p> | Yes                                                                                                                                                                                                                                                                                                                                                                                                                                                                                                                                                                                                                                                                                                                                                                                                                                                                                                                                                                                                                                                                                                                                                                                                                                                                                                                                                                                                                                                                                                                                                                                                                                                                                                                                                                                                                                                                                                                                                                                                                                                                                                                                                                                                                                                                                                                                                                                                                                                                                |
| <b>Resources</b>                                                                                                                                                                                                                                                                                                                                                                                                                   | Yes                                                                                                                                                                                                                                                                                                                                                                                                                                                                                                                                                                                                                                                                                                                                                                                                                                                                                                                                                                                                                                                                                                                                                                                                                                                                                                                                                                                                                                                                                                                                                                                                                                                                                                                                                                                                                                                                                                                                                                                                                                                                                                                                                                                                                                                                                                                                                                                                                                                                                |

|                                                                                                                                                                                                                                                                                                                                                                                                                                                                                                                                                         |            |
|---------------------------------------------------------------------------------------------------------------------------------------------------------------------------------------------------------------------------------------------------------------------------------------------------------------------------------------------------------------------------------------------------------------------------------------------------------------------------------------------------------------------------------------------------------|------------|
| <p>A description of all resources used, including antibodies, cell lines, animals and software tools, with enough information to allow them to be uniquely identified, should be included in the Methods section. Authors are strongly encouraged to cite <a href="#">Research Resource Identifiers</a> (RRIDs) for antibodies, model organisms and tools, where possible.</p> <p>Have you included the information requested as detailed in our <a href="#">Minimum Standards Reporting Checklist</a>?</p>                                             |            |
| <p><b>Availability of data and materials</b></p> <p>All datasets and code on which the conclusions of the paper rely must be either included in your submission or deposited in <a href="#">publicly available repositories</a> (where available and ethically appropriate), referencing such data using a unique identifier in the references and in the “Availability of Data and Materials” section of your manuscript.</p> <p>Have you have met the above requirement as detailed in our <a href="#">Minimum Standards Reporting Checklist</a>?</p> | <p>Yes</p> |

[Click here to view linked References](#)

1     **The genome of the golden apple snail *Pomacea canaliculata* provides insight into**  
2  
3     **stress tolerance and invasive adaptation**

4     Conghui Liu<sup>1\*</sup>, Yan Zhang<sup>1\*</sup>, Yuwei Ren<sup>1\*</sup>, Hengchao Wang<sup>1</sup>, Shuqu Li<sup>1</sup>, Fan Jiang<sup>1</sup>, Lijuan Yin<sup>1</sup>,  
5  
6     Xi Qiao<sup>1</sup>, Guojie Zhang<sup>2</sup>, Wanqiang Qian<sup>1</sup>, Bo Liu<sup>1†</sup>, Wei Fan<sup>1†</sup>

7     <sup>1</sup>Agricultural Genomic Institute, Chinese Academy of Agricultural Sciences,  
8     Shenzhen, Guangdong, 518120, China.

9     <sup>2</sup>BGI-Shenzhen, Shenzhen, Guangdong, 518083, China

10    Conghui Liu: rapherlch@163.com; Yan Zhang: milrazhang@163.com; Yuwei Ren:

11    xiaoshudaxia@126.com; Hengchao Wang: wanghengchao000@qq.com; Shuqu Li:

12    lishuqu1234@163.com; Fan Jiang: greatjf@163.com; Lijuan Yin:

13    yinlijuan1005@163.com; Xi Qiao: [qiaoxi@caas.cn](mailto:qiaoxi@caas.cn); Guojie Zhang:

14    guojie.zhang@bio.ku.dk

15    \*These authors contributed equally to this work.

16    †Correspondence should be addressed to Bo Liu ([lb\\_bobo@aliyun.com](mailto:lb_bobo@aliyun.com)) or Wei Fan  
17    ([fanwei@caas.cn](mailto:fanwei@caas.cn)).

18    **Abstract**

19    **Background:** The golden apple snail (*Pomacea canaliculata*) is a fresh water snail  
20    listed among the top-100 worst invasive species worldwide and a noted agricultural  
21    and quarantine pest that causes great economic losses. It is characterized by fast  
22    growth, strong stress tolerance, a high reproduction rate, and adaptation to a broad  
23    range of environments.

24    **Results:** Here, we used long-read sequencing to produce a 440-Mb high-quality,

1 23 chromosome-level assembly of the *P. canaliculata* genome. In total, 50 Mb (11.4%)  
2  
3 24 repeat sequences and 21,533 gene models were identified in the genome. The major  
4  
5  
6 25 findings of this study include the recent explosion of DNA/hAT-Charlie transposable  
7  
8  
9 26 elements (TEs), the expansion of the P450 gene family and the constitution of the  
10  
11  
12 27 cellular homeostasis system, which contributes to ecological plasticity in stress  
13  
14  
15 28 adaptation. In addition, the high transcriptional levels of perivitellin genes in the  
16  
17  
18 29 ovary and albumen gland promote the function of nutrient supply and defence ability  
19  
20  
21 30 in eggs. Furthermore, the gut metagenome also contains diverse genes for food  
22  
23  
24 31 digestion and xenobiotic degradation.

25 32 **Conclusions:** These findings collectively provide novel insights into the molecular  
26  
27  
28 33 mechanisms of the ecological plasticity and high invasiveness.

29  
30 34 **Keywords:** golden apple snail, *Pomacea canaliculata*, genome, adaptive evolution,  
31  
32  
33 35 stress tolerance, P450, reproduction, perivitelline, metagenome  
34  
35  
36  
37

## 38 36 **Background**

39  
40  
41

42 37 The golden apple snail *Pomacea canaliculata* (family Ampullariidae, order  
43  
44  
45 38 Architaenioglossa) is a fresh water snail listed among the world's top 100 worst  
46  
47  
48 39 invasive species [1] and is considered an agricultural and quarantine pest worldwide  
49  
50  
51 40 [2]. Native to tropical and subtropical South America, *P. canaliculata* gradually  
52  
53  
54 41 spread to non-indigenous regions, such as Southeast and East Asia [3], Africa [4],  
55  
56  
57 42 North America [5], Oceania [6] and even Europe [7]. Its successful  
58  
59  
60 43 biological invasion was closely related to its polyphagous feeding habits [8],  
61  
62  
63  
64  
65

1 44 voracious appetite [9], broad environmental adaptability [10] and rapid growth and  
2  
3 45 high rate of reproduction [11]. In addition to its ecological impact, *P. canaliculata*  
4  
5  
6 46 ravages a wide range of crops, including grains, fruits and vegetables [12], causing  
7  
8  
9 47 severe economic losses each year as a result of yield loss, replanting cost and  
10  
11  
12 48 expenditures on control (<https://www.cabi.org/isc/datasheet/68490>). More seriously, *P.*  
13  
14 49 *canaliculata* has been involved in the transmission of a fatal human disease,  
15  
16  
17 50 eosinophilic meningitis, which first appeared in East Asia where people frequently  
18  
19  
20 51 consume these snails [13]. During this pathophoresis, *P. canaliculata* acts as an  
21  
22  
23 52 important intermediate host of the pathogenic parasite *Angiostrongylus cantonensis*,  
24  
25  
26 53 and the range of infected regions is still expanding, creating a great challenge in terms  
27  
28  
29 54 of human health [14, 15].

30  
31 55 Molluscs are a highly diverse group, second only to arthropods in species number [16],  
32  
33  
34 56 and their high biodiversity makes them an excellent model to address issues such as  
35  
36  
37 57 biogeography, adaptability and evolutionary processes [17]. The worldwide invasive  
38  
39  
40 58 species *P. canaliculata* provides valuable potential in these fields [18]. As a primitive  
41  
42  
43 59 circumtropical species, *P. canaliculata* possesses strong ecological plasticity with  
44  
45  
46 60 many advantages, including low-temperature resistance [19] and drought tolerance  
47  
48  
49 61 [20], which has contributed to its competitive success in resource acquisition. *P.*  
50  
51  
52 62 *canaliculata* has been reported to establish populations at temperatures ranging from  
53  
54  
55 63 10 °C to 35 °C [19, 21]. Additionally, *P. canaliculata* tolerates heavy metal  
56  
57  
58 64 contamination. When living in contaminated water, the gill is enriched with a high  
59  
60  
61 65 concentration of heavy metals, and histopathological changes in the digestive tract are



1 66 detected; however, an extremely low mortality rate is observed [22]. The conspicuous  
2  
3 67 colouration and neurotoxic lectin could confer a survival advantage on the eggs,  
4  
5  
6 68 defending the embryos against potential predators [23]. Moreover, an  
7  
8  
9 69 immune-neuroendocrine system can also be detected in *P. canaliculata*, as  
10  
11  
12 70 demonstrated by the existence of a specific immune memory after bacterial challenge  
13  
14  
15 71 [24, 25], broadening the study of invertebrate immunology.

16  
17 72 The rich phenotypic and genetic diversity of molluscs makes them an excellent  
18  
19  
20 73 species group for addressing many important issues in evolution, ecology and  
21  
22  
23 74 function. However, the genomic resources on Mollusca are still insufficient compared  
24  
25  
26 75 with those of other close phyla, such as Arthropoda and Nematoda, and few molluscs  
27  
28  
29 76 can be employed as model organisms. *P. canaliculata*, however, possesses the  
30  
31  
32 77 potential to be a model organism among molluscs because of several inherent  
33  
34  
35 78 characteristics. For example, *P. canaliculata* is easy to acquire because it has a broad  
36  
37  
38 79 global distribution originating from a primarily circumtropical environment.  
39  
40  
41 80 Moreover, its high adaptability, rapid growth and efficient reproduction facilitate the  
42  
43  
44 81 cultivation of *P. canaliculata* in the laboratory.

45 82 In recent years, the genomic features of *P. canaliculata* have been increasingly studied.  
46  
47  
48 83 After the discovery of 14 pachytene bivalents in the karyotype [26], molecular  
49  
50  
51 84 markers were identified to investigate the genetic diversity of the *P. canaliculata*  
52  
53  
54 85 population, including 369 amplified fragment length polymorphism (AFLP) loci [27],  
55  
56  
57 86 16,717 simple sequence repeats (SSR) [28, 29] and 15,412 single-nucleotide  
58  
59  
60 87 polymorphisms SNPs [30]. In addition, multiple transcriptome analyses have been

1 88 performed to investigate the adaptation, invasion and immune mechanisms of *P.*  
2  
3 89 *canaliculata*. For instance, Sun et al. reported 128,436 unigenes based on a de novo  
4  
5  
6 90 assembly of Illumina reads [30]; transcriptome changes in response to heat stress and  
7  
8  
9 91 starving incubation were used to characterize its invasive and adaptive abilities [31,  
10  
11  
12 92 32]; a transcriptome analysis comparing invasive *P. canaliculata* and indigenous  
13  
14 93 *Cipangopaludina cathayensis* provided insights into biological invasion [29]; and 402  
15  
16  
17 94 immune-related differentially expressed genes (DEGs) in response to  
18  
19  
20 95 lipopolysaccharide (LPyS) challenge were used to explore the mechanisms of defence  
21  
22  
23 96 against pathogens [33]. Furthermore, proteomics tools such as isobaric tags for  
24  
25  
26 97 relative and absolute quantitation (iTRAQ), and liquid chromatography-tandem mass  
27  
28  
29 98 spectrometry (LC-MS/MS) were also applied in the study of protein expression  
30  
31  
32 99 during estivation and oviposition [34,35], together providing plentiful omics- data for  
33  
34 100 the functional analysis of *P. canaliculata*.  
35  
36  
37 101 However, research at the whole-genome level in *P. canaliculata* still lags far behind  
38  
39  
40 102 that in other mollusc species due to the lack of a high-quality reference genome.  
41  
42  
43 103 Multiple draft genomes of molluscs have been published, including the genomes of  
44  
45  
46 104 the California sea hare [36], Pacific oyster [37], pearl oyster [38,39], owl limpet [40],  
47  
48  
49 105 California two-spot octopus [41], golden mussel [42], and *Biomphalaria* snails [43],  
50  
51  
52 106 greatly promoting research on mollusc genomics. In this study, we present a  
53  
54  
55 107 chromosome-level genome assembly of *P. canaliculata* with high-quality gene  
56  
57  
58 108 annotation, transcriptome data from several tissues and under various conditions, and  
59  
60  
61 109 metagenomic data from the intestinal tracts, all of which were then applied to study

1 110 the species-specific environmental adaptation characteristics, such as the cellular  
2  
3 111 homeostasis system underlying strong stress and the colour and nutrient contents of  
4  
5  
6 112 the eggs. Our data will not only strengthen the understanding of the evolutionary  
7  
8  
9 113 mechanisms of molluscs and the molecular basis of biological invasion but also foster  
10  
11  
12 114 the development of approaches to control the invasion of *P. canaliculata* and provide  
13  
14  
15 115 a basis for interrupting the transmission of pathogenetic nematode parasites.

## 19 116 **RESULTS**

### 23 117 **Complete genome assembly at the chromosome level**

27 118 We generated 26.6 Gb (60.1 X) of PacBio SMRT raw reads with an average read  
28  
29  
30 119 length of 10.1 kb, and 291 Gb (652.4 X) of Illumina HiSeq paired-end reads with an  
31  
32  
33 120 average read length of 150-250 bp using DNA extracted from a single adult *P.*  
34  
35 121 *canaliculata* (Table S1). The 24.4 Gb (55.4 X) of clean PacBio SMRT reads that  
36  
37  
38 122 passed quality filtering were assembled by smartdenovo  
39  
40  
41 123 (<https://github.com/ruanjue/smartdenovo>), resulting in an assembly of 1,234 raw  
42  
43  
44 124 contigs with a total length of 473.0 Mb and an N50 length of 1.0 Mb. After filtering of  
45  
46  
47 125 alternatively heterozygous contigs, the 745 resulting contigs with a total length of  
48  
49  
50 126 440.1 Mb and an N50 length of 1.1 Mb were taken as the final contigs. Previous  
51  
52 127 karyotype research has shown that the haploid *P. canaliculata* genome consists of 14  
53  
54  
55 128 chromosomes [26]. Based on the Hi-C data, 439.5 Mb (99.9%) of final contigs were  
56  
57  
58 129 anchored and oriented into 14 large scaffolds, each corresponding to a natural  
59  
60 130 chromosome (Figure 1a and Figure 1b), with the longest 45.4 Mb and the shortest

1 131 27.2 Mb. This assembly quality is much better than that of the other molluscan  
2  
3 132 genomes published thus far (Table 1). In addition to the length and continuity of the  
4  
5  
6 133 assembled sequences, another important aspect for evaluating genome assembly is the  
7  
8  
9 134 ratio of genome coverage. With an estimated genome size of 446 Mb and genome  
10  
11 135 heterozygosity between 1% and 2% based on the distribution of k-mer frequency [44]  
12  
13 136 (Figure S1), ~98.6 % of the *P. canaliculata* genome has been assembled. To further  
14  
15  
16 137 confirm the accuracy and completeness of the assembly, we mapped the Illumina  
17  
18  
19 138 shotgun reads to the assembled reference genome. Significantly, 97% and 95% of the  
20  
21  
22 139 genome-derived and transcriptome-derived reads, respectively, could be aligned to the  
23  
24  
25 140 reference genome, suggesting no obvious bias in sequencing and assembly.  
26  
27  
28 141 Additionally, the mitochondrial genome of *P. canaliculata* was assembled as a single  
29  
30  
31 142 contig 15,707 bp in length, which has 99.9% sequence identity to the published  
32  
33  
34 143 mitochondrial genome (GenBank: KJ739609.1) (Figure S2). This high-quality  
35  
36  
37 144 reference genome provides a good foundation for gene annotation.  
38  
39 145 The protein-coding genes were predicted on the reference genome by EVM,  
40  
41  
42 146 integrating evidence from *de novo* prediction, transcriptome and homology data. In  
43  
44  
45 147 total, 21,533 gene models were predicted as the reference gene set, with coding  
46  
47  
48 148 regions spanning ~32.2 Mb (7.3 %) of the genome (Table 1 and Table S2). The  
49  
50  
51 149 distribution of CDS length in *P. canaliculata* is similar to that in closely related  
52  
53  
54 150 species (Figure 1c). Overall, 97.5% of the reference genes were supported by  
55  
56  
57 151 transcriptome data, and 98.0% of eukaryote core genes from OrthoDB  
58  
59  
60 152 (<http://www.orthodb.org/>) were identified in the reference gene set by BUSCO. These

1 153 results were comparable to those in other published molluscan genomes (Table 1). In  
2  
3  
4 154 functional annotation, a total of 19,815 (91.9 %) reference genes were annotated by at  
5  
6 155 least one functional database. Specifically, 15,662 (72.7%), 13,769 (63.4%), 17,081  
7  
8  
9 156 (79.3%), 18,847 (87.5%) and 17,003 (79.9%) reference genes were annotated with the  
10  
11  
12 157 eggNOG, KEGG, NR, InterPro and UniProt databases, respectively (Figure S3).  
13  
14

### 15 158 **Signs of adaptive evolution in *P. canaliculata* genome**

16  
17  
18

19 159 To gain insight into the evolutionary perspective of *P. canaliculata*, a phylogenetic  
20  
21  
22 160 tree was built based on 306 high-confidence single-copy orthologous genes from nine  
23  
24  
25 161 related species (*P. canaliculata*, *Lottia gigantea*, *Aplysia californica*, *Biomphalaria*  
26  
27 162 *glabrata*, *Crassostrea gigas*, *Octopus bimaculoides*, *Pinctada fucata*, *Lingula anatina*  
28  
29  
30 163 and *Limnoperna fortunei*) by PhyML [45] and the divergence time was estimated  
31  
32  
33 164 using MCMCTree [46]. The results show that *P. canaliculata* diverged from the  
34  
35  
36 165 ancestor of *B. glabrata* and *A. californica* 372 million years ago (Mya) and from *L.*  
37  
38 166 *gigantea* 491 Mya (Figure 2a).  
39  
40

41 167 Then, the molluscan orthologous genes were investigated for adaptive evolution.  
42  
43  
44 168 Utilizing pairwise protein sequence similarities, gene family clustering was conducted  
45  
46  
47 169 by orthoFinder [47]. A total of 239,541 reference genes from the nine species were  
48  
49  
50 170 clustered into 69,582 orthologous groups, among which 14,766 orthologous groups  
51  
52  
53 171 contained at least two genes each. We identified 66 orthologous groups that  
54  
55  
56 172 underwent common expansion in both *P. canaliculata* and *L. fortunei* but not the other  
57  
58 173 seven species. The functions of these orthologous groups are mainly related to signal  
59  
60  
61  
62  
63  
64  
65

1 174 transduction; replication and repair; translation, glycan biosynthesis and metabolism;  
2  
3 175 lipid metabolism; and the endocrine, immune and nervous systems (Figure S4). These  
4  
5  
6 176 relations suggest that the gene families that underwent expansion may play important  
7  
8  
9 177 roles in adaptation to the environment as invasive species.  
10  
11 178 The high-coverage genome assembly enables a comprehensive analysis of the  
12  
13 179 transposable elements (TEs), which play multiple roles in driving genome evolution  
14  
15  
16 180 in eukaryotes [48]. In total, we identified 49.6 Mb TE sequences in the assembled *P.*  
17  
18  
19 181 *canaliculata* genome (Table 1), including 3.4 Mb long terminal repeats (LTRs), 27.2  
20  
21  
22 182 Mb long interspersed elements (LINEs), 17.5 Mb DNA transposons and 1.5 Mb short  
23  
24  
25 183 interspersed elements (SINEs). Next, we analysed the divergence rate of each class of  
26  
27  
28 184 TEs among the available sequenced mollusc genomes. Notably, the TE class of DNA  
29  
30  
31 185 transposons showed a specific peak at a divergence rate of ~4% divergence rate for *P.*  
32  
33  
34 186 *canaliculata* and *C. gigas* (Figure 2b), indicating a recent explosion of DNA  
35  
36  
37 187 transposons in these two species. We analysed the expression of 709 genes, including  
38  
39 188 DNA elements restricted to the 4% peak inside the gene region, compared with that of  
40  
41  
42 189 the other genes outside the 4% peak (Figure S5). DEGs were defined here by P-values  
43  
44  
45 190 smaller than 0.05 for comparison of the treatment (heat, cold, heavy metal and air  
46  
47  
48 191 exposure) and control data. The percentages of DEGs in the 4% peak were higher than  
49  
50  
51 192 those of genes outside the peak (10.2% higher for heat, 8.6% higher for cold, 8.6%  
52  
53 193 higher for heavy metal, and 7.3% higher for air exposure). Among the DEGs in the 4%  
54  
55  
56 194 peak, approximately half were up-regulated, and the other half were down-regulated.  
57  
58  
59 195 Moreover, the DEGs in the 4% peak were mainly enriched in cellular metabolic

1 196 process, response to stimulus, localization and signaling according to GO annotation.  
2  
3 197 These results indicated that genes in the 4% peak were likely to be more active in the  
4  
5  
6 198 response to stimulus, promoting potential plasticity in stress adaptation. TEs are  
7  
8  
9 199 powerful facilitators of evolution that generate “evolutionary potential” to introduce  
10  
11  
12 200 small adaptive changes within a lineage, and the importance of TEs in stress  
13  
14  
15 201 responses and adaptation has been reported in numerous studies [49,50]. The recent  
16  
17  
18 202 explosion of DNA TEs in *P. canaliculata* could also play an important role in  
19  
20  
21 203 promoting the potential plasticity in stress adaptation.  
22

#### 23 204 **Investigation of cellular homeostasis system underlying strong stress adaptation**

25  
26  
27 205 The homeostasis system plays a crucial role in stress adaptability, providing the  
28  
29  
30 206 molecular basis for re-establishing dynamic equilibrium after challenges by various  
31  
32  
33 207 environmental stressors, including temperature, air exposure, anthropogenic pollution  
34  
35  
36 208 and pathogens [51]. In this study, we addressed three constituent parts of the cellular  
37  
38  
39 209 homeostasis system, which contributes to the successful ecological plasticity of *P.*  
40  
41  
42 210 *canaliculata* (Figure 3). The transcriptomes of the hemocytes after different stimuli  
43  
44  
45 211 (cold, heat, heavy metal and air exposure) were also sequenced and analysed to  
46  
47  
48 212 address the potential roles of these genes in the cellular homeostasis system.

49  
50  
51 213 The unfolded protein response (UPR) system is the central component of protein  
52  
53  
54 214 homeostasis [52]. Heat shock proteins (HSPs) act as molecular chaperones to  
55  
56  
57 215 maintain correct folding, and heat shock transcription factor 1 (HSF1) is responsible  
58  
59  
60 216 for the transcriptional induction of HSPs [53]. In the *P. canaliculata* genome, 13

1 217 HSP70s, 6 HSP90s, 7 HSP40s and 11 HSFs were identified (Table S3), and the  
2  
3 218 expression of HSP90s and HSFs was highly induced in response to heat, cold, heavy  
4  
5  
6 219 metal and air exposure (Table S4 and Figure S6). Inositol-requiring protein 1 (IRE1),  
7  
8  
9 220 protein kinase RNA-like ER kinase (PERK), and activating transcription factor 6  
10  
11 221 (ATF6) are three mediators recruited by the endoplasmic reticulum (ER) to regulate  
12  
13 222 the UPR [54]. We found putative coding genes of the three core mediators, their  
14  
15 223 respective downstream transcription factors, and the corresponding recognition  
16  
17 224 chaperones in the *P. canaliculata* genome (Table S3).

22 225 The xenobiotic biotransformation system helps the molluscs adapt to toxicants,  
23  
24 226 especially pesticides in aquatic environments [55]. Manual annotation of this genome  
25  
26 227 identified 157 cytochrome P450s (CYP450s), 15 flavin-containing monooxygenases  
27  
28 228 (FMOs), 53 glutathione S-transferases (GSTs) and 105 ATP binding cassette (ABC)  
29  
30 229 transporters, most of which showed up-regulated expression under stress (Table S3  
31  
32 230 and Table S4). These proteins have been shown to function in contaminant detection,  
33  
34 231 conjugative modification and expulsion for xenobiotic detoxification [56-58].

35  
36 232 The massive production of reactive oxygen species (ROS) and reactive oxygen  
37  
38 233 intermediates (ROIs) induced by stress leads to many pathological conditions, and  
39  
40 234 antioxidant systems protect the organism from superoxide [59]. Four main antioxidant  
41  
42 235 enzyme classes, namely, superoxide dismutase (SOD), catalase (CAT), peroxidase  
43  
44 236 (Prx), and glutathione peroxidase (GPX), were found in *P. canaliculata* and showed  
45  
46 237 elevated global expression in response to stress (Table S3 and Table S4).

47  
48 238 Apoptosis is a process of cell death when sensing stress and the regulation of  
49  
50  
51  
52  
53  
54  
55  
56  
57  
58  
59  
60  
61  
62  
63  
64  
65



1 239 apoptosis contributes to the dynamic homeostasis of the internal environment. In *P.*  
2  
3 240 *canaliculata*, we propose the existence of both intrinsic and extrinsic apoptotic  
4  
5  
6 241 signaling pathways, evidenced by the presence of homologous genes involved in both  
7  
8  
9 242 pathways. These two pathways could be activated by cytochrome C and tumour  
10  
11  
12 243 necrosis factor receptor (TNFR), respectively (Table S3). Inhibitors of apoptosis, such  
13  
14  
15 244 as XIAP, Bcl2 and Bak, are also detected and show increased expression in response  
16  
17  
18 245 to stress (Table S4), which is expected to delay the process of apoptosis and cell death  
19  
20  
21 246 in the stress response.

#### 22 23 24 247 **The expansion of the P450 gene family contribute to stress tolerance**

25  
26  
27 248 Cytochrome P450 (CYP) enzymes are a monooxygenase family with highly diverse  
28  
29  
30 249 structures and functions that have been widely identified in all kingdoms of life [60].  
31  
32  
33 250 P450s catalyse the reductive scission of molecular oxygen and are responsible for the  
34  
35  
36 251 synthesis and metabolism of various molecules, including drugs, hormones,  
37  
38  
39 252 antibiotics, pesticides, carcinogens and toxins [61]. The hormones they synthesize,  
40  
41  
42 253 such as glucocorticoids, mineralocorticoids, progestins, and sex hormones, are critical  
43  
44  
45 254 to stress response, growth and reproduction, and the endogenous and exogenous  
46  
47  
48 255 chemical metabolism participate in combatting toxic compounds [62].

49  
50 256 We found that the *P. canaliculata* CYP gene family had undergone an expansion  
51  
52  
53 257 compared to that in the other molluscs. We identified 157 genes in the genome of *P.*  
54  
55  
56 258 *canaliculata* and 128, 102, 135, 115, 78, 52 and 94 genes in *A. californica*, *B.*  
57  
58  
59 259 *glabrata*, *C. gigas*, *L. fortunei*, *L. gigantea*, *O. bimaculoides* and *P. fucata* respectively,

1 260 using the same standard (Figure 4a). An expansive trend was also observed in  
2  
3  
4 261 comparison with other model species, such as *Homo sapiens* (57), *Mus musculus*  
5  
6 262 (102), *Danio rerio* (94) and *Drosophila melanogaster* (94) [63]. Gene expansion was  
7  
8  
9 263 mainly found in the CYP2U and CYP3A sub-families, whereas fewer genes were  
10  
11  
12 264 expanded in CYP4F. In mammals, CYP2U participates in the metabolism of fatty  
13  
14 265 acids to generate bioactive eicosanoid derivatives, potentially regulating the  
15  
16  
17 266 development of immune function [64]. In *P. canaliculata*, 40 genes formed the  
18  
19  
20 267 CYP2U clade, mainly expressed in the hepatopancreas (Figure 4b and Table S5\_a,  
21  
22  
23 268 Table S5\_b). CYP3A is a versatile enzyme that metabolizes a wide range of  
24  
25  
26 269 xenobiotics, and its production promotes the growth of various cell types [65]. The 56  
27  
28  
29 270 CYP3A genes are comprehensively expressed in the hepatopancreas, gill and kidney  
30  
31  
32 271 (Figure 4b and Table S5\_a, Table S5\_b). CYP4F possesses epoxygenase activity,  
33  
34  
35 272 metabolizing fatty acids to epoxides to suppress hypertension, pain perception and  
36  
37  
38 273 inflammation [66]. Twenty genes were identified in CYP4F, and Pc06G011748,  
39  
40  
41 274 Pc06G011460, Pc06G011458, Pc06G011459, Pc04G006708, Pc04G006710 and  
42  
43  
44 275 Pc04G006707 exhibited highly induced expression levels under cold, heat, heavy  
45  
46  
47 276 metal and air exposure stress, indicating their critical roles in the stress tolerance  
48  
49  
50 277 (Figure 4b, Table S5\_a and Table S5\_b).

51 278 **The identification of perivitellin genes and their high transcriptional levels in the**  
52  
53  
54 279 **ovary and albumen gland**

55  
56  
57 280 *P. canaliculata* has eggs characterized by abundant nutrients, reddish or pinkish  
58  
59  
60 281 colour, aerial oviposition and neurotoxicity [23, 67] due to the perivitelline Fluid

1 282 (PVF), which fills the space between the eggshell and the embryo and consists of  
2  
3 283 carbohydrates, lipids and proteins (Figure 5a). The PVF proteins in *P. canaliculata*,  
4  
5  
6 284 include three major components, PcOvo, PcPV2, and PcPV3 [68], collectively named  
7  
8  
9 285 perivitellins, which make up 90% of the total proteins, whereas most of the other  
10  
11  
12 286 dozens of low-abundance components each account for less than 1% of the total  
13  
14  
15 287 proteins [35]. The perivitellins are not only responsible for the major supply of  
16  
17  
18 288 materials and energy during embryogenesis but also provide warning pigments and  
19  
20  
21 289 deadly toxicants against predators [23, 69, 70].

22  
23 290 We identified 28 candidate PVF genes in *P. canaliculata* by mapping each of the 59  
24  
25  
26 291 fragmental PVF protein sequences derived from a previous proteomics study by Sun  
27  
28  
29 292 [35] to its best hit in the reference gene set of *P. canaliculata*, using BLASTP with  
30  
31  
32 293 requirements of over 85% identity and at least 50% alignment length (Table S6). Then,  
33  
34  
35 294 the functional annotation of those fragmental proteins was also transferred to our  
36  
37  
38 295 identified PVF genes. The transcriptome data show that 22 (79%) of the 28 candidate  
39  
40  
41 296 PVF genes exhibit their highest expression in the ovary and albumen gland (PVF  
42  
43  
44 297 protein synthesis factory) among all 7 tissues (Figure 5b and Table S7), confirming  
45  
46  
47 298 that most of them are genuine functional PVF genes. Six of these 28 candidate PVF  
48  
49  
50 300 Pc09G015548 (PcOvo3); two PcPV2 genes, Pc07G012572 (PcPV2-31) and  
51  
52  
53 301 Pc07G012571 (PcPV2-67); and two possible PcPV3 genes, Pc09G015546 and  
54  
55  
56 302 Pc09G015547. The expression levels of these 6 genes in the ovary and albumen gland  
57  
58  
59 303 are much higher than those of the other 22 candidate PVF genes.

1 304 By analysing the orthoFinder gene families that include orthologous and paralogous  
2  
3 305 genes from *P. canaliculata* and 8 other sequenced mollusc species, we found that  
4  
5  
6 306 these 28 candidate PVF genes were classified into 20 multiple-gene families ( $\geq 2$   
7  
8  
9 307 genes) and 7 single-gene families (only one gene) (Table S8). Notably, 5 of the 6  
10  
11 308 perivitellin genes were classified into single-gene families, except for Pc07G012571  
12  
13 309 (PcPV2-67), which not only has homologous genes in other mollusc species but also  
14  
15 310 has three paralogous genes in *P. canaliculata* itself. However, none of these three  
16  
17 311 PcPV2-67 paralogous genes in *P. canaliculata* showed higher expression in the ovary  
18  
19 312 and albumen gland than in other tissues, indicating that they are likely not  
20  
21 313 PVF-related genes, i.e., only Pc07G012571 plays a role in PVF. The nearly unique  
22  
23 314 and single-copy nature of the 6 perivitellin genes in *P. canaliculata*, may be explained  
24  
25 315 by the long evolutionary distance, over 200 Mya for *P. canaliculata* and its most  
26  
27 316 closely related species, *A. californica*, as well as numerous differences in their living  
28  
29 317 characteristics and egg structures. Another possible explanation is that these 6 major  
30  
31 318 PVF genes may have experienced rapid evolution in their history to adapt to the  
32  
33 319 changing environment.

## 320 **The gut microbiome plays important roles in stress resistance and food digestion**

321 The gut microbiome is regarded as the “second genome” of the host animal, due to the  
322 fact that gut microbiota contributes to the food digestion, immune system  
323 development, and many other processes important to the host. To investigate the  
324 relationship between the gut microbiome and the invasive lifestyle of *P. canaliculata*,

1 325 we collected gut digesta samples from 70 *P. canaliculata* snails and generated 31 Gb  
2  
3 326 of high-quality metagenomic data on the Illumina HiseqX10 platform. To our  
4  
5  
6 327 knowledge, this study is the first in-depth sequencing of the snail gut microbiome. A  
7  
8  
9 328 total of 1,142,095 non-redundant genes were obtained with an average open reading  
10  
11  
12 329 frame (ORF) length of 604 bp (Table S9). The taxonomic composition analysis  
13  
14  
15 330 showed that, at the phylum level, Proteobacteria was predominant, followed by  
16  
17  
18 331 Verrucomicrobia, Bacteroidetes, Firmicutes, Spirochaetes, Actinobacteria, etc. (Table  
19  
20  
21 332 S10\_a). At the genus level, the most abundant genera included *Aeromonas*,  
22  
23 333 *Enterobacter*, *Desulfovibrio*, *Citrobacter*, *Comamonas*, *Klebsiella* and *Pseudomonas*  
24  
25 334 (Table S10\_b), most of which were also present in *Achatina fulica* [71,72].  
26  
27  
28 335 Interestingly, some of the most abundant genera, such as *Desulfovibrio*, *Citrobacter*  
29  
30  
31 336 and *Pseudomonas*, were reported as having strong abilities to remove heavy metals by  
32  
33  
34 337 bioprecipitation and bioabsorption [73-75]. For example, the sulfur-reducing bacteria  
35  
36  
37 338 *Desulfovibrio* produce H<sub>2</sub>S, which precipitates metals and therefore reduces the toxic  
38  
39  
40 339 effects of dissolved metals [73]. Based on the KEGG pathway database, the complete  
41  
42  
43 340 sulfate reduction metabolism pathway was identified in the *P. canaliculata* gut  
44  
45  
46 341 microbiome. We suggested that these gut microbes might help *P. canaliculata* survive  
47  
48  
49 342 the environmental stress of heavy metals in harsh conditions. In addition, a large  
50  
51  
52 343 number of genes in xenobiotic biodegradation and metabolism pathways were  
53  
54  
55 344 annotated, corresponding to 288 KEGG orthologous groups (KOs) and 21 pathways  
56  
57  
58 345 (Table S11). As many of the pathways, such as benzoate degradation, toluene  
59  
60  
61 346 degradation, xylene degradation and steroid degradation, could not be identified in the

1 347 host genome through KO analysis, we suggested that microbial detoxification abilities  
2  
3 348 may contribute to the ability *P. canaliculata* to resist stresses caused by xenobiotics  
4  
5  
6 349 such as pesticides and environmental pollutants.  
7

8  
9 350 In digestion, the gut microbes are directly involved in the breakdown of the cellulose  
10  
11 351 portion of the diet, and previous studies have isolated cellulolytic bacteria and  
12  
13  
14 352 evaluated the cellulolytic enzyme activities [76]. Our work found a broader range of  
15  
16  
17 353 carbohydrate active enzymes (CAZymes). Of the 208 annotated CAZyme families, 99  
18  
19  
20 354 were glycoside hydrolase (GH) families (Table S12). Enzymes that could be classified  
21  
22  
23 355 as cellulases, endohemicelluloses, debranching enzymes, and  
24  
25  
26 356 oligosaccharide-degrading enzymes were all identified. These findings indicate that  
27  
28  
29 357 the gut microbiome provides assistance in digesting a broad range of food sources,  
30  
31 358 enabling *P. canaliculata* to grow rapidly and adapt to an invasive lifestyle.  
32  
33  
34

## 35 **Conclusion**

36  
37  
38  
39

40 360 Given its environmental invasiveness, broad stress adaptability and rapid reproduction,  
41  
42  
43 361 the golden apple snail *P. canaliculata* has received a vast amount of attention  
44  
45  
46 362 worldwide. However, the underlying genetic mechanisms of these properties have not  
47  
48  
49 363 been comprehensively uncovered. The chromosome-level genome of *P. canaliculata*  
50  
51  
52 364 presented in this study sheds the first light on into the genomic basis of its ecological  
53  
54  
55 365 plasticity in response to various stressors. The major findings of this study include the  
56  
57  
58 366 recent explosion of DNA/hAT-Charlie TEs, the expansion of the P450 gene family  
59  
60  
61 367 and the constitution of the cellular homeostasis system, all of which contribute to the  
62  
63  
64  
65

1 368 plasticity of the organism in stress adaptation. Although the function of the recently  
2  
3 369 originated TEs could not be confirmed, TEs are considered powerful facilitators in  
4  
5  
6 370 adaptive evolution, suggesting that their increased number plays an important role in  
7  
8  
9 371 the stress resistance of *P. canaliculata*. The UPR system, xenobiotic biotransformation  
10  
11  
12 372 system and ROS system are all major components of the cellular homeostasis system,  
13  
14 373 and the P450s in particular underwent expansion with specific functions. In addition,  
15  
16  
17 374 exclusive perivitellin genes were identified in the *P. canaliculata* genome, and they  
18  
19  
20 375 are believed to contribute to the high reproductive rate and the expansion of habitats.  
21  
22  
23 376 Furthermore, the gut metagenome contains diverse genes for food digestion and  
24  
25  
26 377 xenobiotic degradation. These findings collectively provide novel insight into the  
27  
28  
29 378 molecular mechanisms of ecological plasticity and high invasiveness.  
30  
31 379 In this study, we report a fine reference genome of *P. canaliculata*, first  
32  
33  
34 380 chromosome-level Mollusca genome published. With widespread distribution, rapid  
35  
36  
37 381 growth and efficient reproduction, *P. canaliculata* possesses the potential to be a  
38  
39  
40 382 model organism of Mollusca. As its cellular complexity and conservation of pathways  
41  
42  
43 383 also make *P. canaliculata* a useful representative of Mollusca, the genome described  
44  
45  
46 384 in this study can be used to advance our understanding of the molecular mechanisms  
47  
48  
49 385 involved in various scientific questions regarding Mollusca.  
50  
51

## 52 386 **Methods**

### 53 54 55 56 387 **Samples collection and sequencing**

57  
58  
59  
60 388 Adults of *P. canaliculata* were collected from a local paddy field in Shenzhen,  
61  
62  
63  
64  
65

1 389 Guangdong province, China, and maintained in aerated freshwater at  $15 \pm 2$  °C for a  
2  
3  
4 390 week before processing. Genomic DNA was extracted from the foot muscles of a  
5  
6 391 single *P. canaliculata* for constructing PCR free Illumina 350-bp insert libraries and  
7  
8  
9 392 PacBio 20-kb insert library, and sequenced on Illumina HiSeq 2500 and PacBio  
10  
11 393 SMRT platforms, respectively. The Hi-C library was prepared using the muscle tissue  
12  
13  
14 394 of another single *P. canaliculata* by following methods: Nuclear DNA was  
15  
16  
17 395 cross-linked in situ, extracted, and then digested with a restriction enzyme. The sticky  
18  
19  
20 396 ends of the digested fragments were biotinylated, diluted, and then ligated to each  
21  
22  
23 397 other randomly. Biotinylated DNA fragments were enriched and sheared again for  
24  
25  
26 398 preparing the sequencing library, which was then sequenced on a HiSeq X Ten  
27  
28 399 platform (Illumina).

29  
30 400 Seven tissues including embryos (2 days post fertilization), gill, hemocytes,  
31  
32  
33 401 hepatopancreas, kidney, ovary and albumen gland and testis from six animals were  
34  
35  
36 402 collected as parallel samples. Next, animals were cultivated in 37 °C and 10 °C for 24  
37  
38  
39 403 hours heat and cold tolerance, in  $\text{Cr}^{3+}$ (2mg L<sup>-1</sup>),  $\text{Cu}^{2+}$ (0.2mg L<sup>-1</sup>) and  $\text{Pb}^{2+}$ (1mg L<sup>-1</sup>)  
40  
41  
42 404 for 24 hours heavy metal tolerance, and in waterless tank for 7 days air exposure.  
43  
44  
45 405 Then the hemocytes were harvested and stored, with three replicates for each group.  
46  
47  
48 406 In final, total RNAs were extracted from the stored tissues of *P. canaliculata*  
49  
50  
51 407 materials, and then mRNAs were pulled out by beads with poly-T for constructing  
52  
53 408 cDNA libraries (insert 350-bp), and sequenced on an Illumina HiSeq 2500 sequencer.  
54  
55  
56 409 The intestinal digesta from 70 adult snails of *P. canaliculata* were collected, pooled  
57  
58  
59 410 into 6 samples and stored at  $-20$  °C until microbial DNA was extracted. A



1 411 combination of cell lysis treatments was applied, including five freeze-thaw cycles  
2  
3 412 (alternating between 65 °C and liquid nitrogen for 5 min), repeated beads-beating in  
4  
5  
6 413 ASL buffer (cat. no. 19082; Qiagen Inc.), and incubated at 95 °C for 15 min. DNA  
7  
8  
9 414 was isolated following the protocol reported protocol [77]. Paired-end libraries of  
10  
11  
12 415 metagenomic DNA were prepared with an insert size of 350 base pairs (bp) following  
13  
14  
15 416 the manufacture's protocol (cat. no. E7645L; New England Biolabs). Sequencing was  
16  
17 417 performed on Illumina HiSeq X10.  
18  
19  
20

## 21 418 **Genome assembly and annotation**

22  
23

24 419 The Illumina raw reads were filtered by trimming the adapter sequence and  
25  
26  
27 420 low-quality regions ([https://github.com/fanagislab/common\\_use](https://github.com/fanagislab/common_use)), resulting in clean  
28  
29  
30 421 and high-quality reads with an average error rate < 0.001. For the PacBio raw data,  
31  
32  
33 422 the short subreads (< 2 kb) and low-quality (error rate > 0.2) subreads were filtered  
34  
35  
36 423 out, and only one representative subread was retained for each PacBio read. The clean  
37  
38  
39 424 PacBio reads were assembled by the software smartdenovo  
40  
41 425 (<https://github.com/ruanjue/smartdenovo>), after which Illumina reads were aligned to  
42  
43  
44 426 the contigs by BWA-MEM (BWA, RRID:SCR\_010910), and single base errors in the  
45  
46  
47 427 contigs were corrected by Pilon v1.16 (Pilon, RRID:SCR\_014731) with the  
48  
49 428 parameters “-fix bases, -nonpf, -minqual 20”. The *P. canaliculata* genome is highly  
50  
51  
52 429 heterozygous, as illustrated by the double peaks on the distribution curve of k-mer  
53  
54  
55 430 frequency, and the current assembly algorithm tends to collapse homozygous regions  
56  
57  
58 431 and report heterozygous regions in alternative contigs. To obtain a haploid reference  
59  
60  
61  
62  
63  
64  
65

1 432 contigs, we employed a whole-genome alignment (WGA) strategy with MUMmer  
2  
3 433 v3.23 to recognize and selectively remove alternative heterozygous contigs, which  
4  
5  
6 434 were characterized by shorter length (less than 200 kb) and the ability of most regions  
7  
8  
9 435 (more than 50%) to be aligned to another larger contig with confident identity (higher  
10  
11  
12 436 than 80%). Next, Hi-C sequencing data were aligned to the haploid reference contigs  
13  
14  
15 437 by BWA-MEM, and then these contigs were clustered into chromosomes with  
16  
17 438 LACH-ESIS (<http://shendurelab.github.io/LACHESIS/>).

19  
20 439 A de novo repeat library for *P. canaliculata* was constructed by RepeatModeler v.  
21  
22 440 1.0.4 (RepeatModeler, RRID:SCR\_015027;  
23  
24  
25 441 <http://www.repeatmasker.org/RepeatModeler.html>). TEs in the *P. canaliculata*  
26  
27  
28 442 genome were also identified by RepeatMasker v4.0.6 (RepeatMasker,  
29  
30  
31 443 RRID:SCR\_012954; <http://www.repeatmasker.org/>) using both the Repbase library  
32  
33  
34 444 and the de novo library. Tandem repeats in the *P. canaliculata* genome were predicted  
35  
36  
37 445 using Tandem Repeats Finder v4.07b [78]. The divergence rates of TEs were  
38  
39  
40 446 calculated between the identified TE elements in the genome and their consensus  
41  
42  
43 447 sequence at the TE family level.

44  
45 448 The gene models in the *P. canaliculata* genome were predicted by EVidence Modeler  
46  
47  
48 449 v1.1.1 [79], integrating evidence from ab initio predictions, homology-based searches  
49  
50  
51 450 and RNA-seq alignments. Then, these gene models were annotated by RNA-seq data,  
52  
53  
54 451 UniProt database and InterProScan software (InterProScan, RRID:SCR\_005829) [80].  
55  
56  
57 452 Finally, the gene models were retained if they had at least one piece of supporting  
58  
59  
60 453 evidence from the UniProt database, InterProScan domain and RNA-seq data. Gene

1 454 functional annotation was performed by aligning the protein sequences to the NCBI  
2  
3 455 NR, UniProt, COG and KEGG databases with BLASTP v2.3.0+ under an E-value  
4  
5  
6 456 cutoff of  $10^{-5}$  and choosing the best hit. Pathway analysis and functional classification  
7  
8  
9 457 were conducted based on the KEGG database [81]. InterProScan was used to assign  
10  
11  
12 458 preliminary GO terms, Pfam domains and IPR domains to the gene models.

### 15 459 **Evolutionary analysis**

18  
19 460 Orthologous and paralogous groups were assigned from seven species (*P.*  
20  
21 461 *canaliculata*, *Lottia gigantea*, *Aplysia californica*, *Biomphalaria glabrata*,  
22  
23  
24 462 *Crassostrea gigas*, *Octopus bimaculoides*, *Pinctada fucata*, *Limnoperna fortunei* and  
25  
26  
27 463 *Lingula anatina*) by OrthoFinder [47] with default parameters. Orthologous groups  
28  
29  
30 464 that contained only one gene for each species were selected to construct the  
31  
32  
33 465 phylogenetic tree. The protein sequences of each gene family were independently  
34  
35  
36 466 aligned by muscle v3.8.31 [82] and then concatenated into one super-sequence. The  
37  
38  
39 467 phylogenetic tree was constructed by maximum likelihood (ML) using PhyML v3.0  
40  
41 468 (PhyML, RRID:SCR\_014629) [45] with the  
42  
43  
44 469 best-fit model (LG+I+G) estimated by ProtTest3 [83]. The Bayesian relaxed  
45  
46  
47 470 molecular clock (BRMC) approach was adopted to estimate the neutral evolutionary  
48  
49  
50 471 rate and species divergence time using the program MCMCTree, implemented in the  
51  
52  
53 472 PAML v4.9 package (PAML, RRID:SCR\_014932) [46]. The tree was calibrated with  
54  
55  
56 473 the following time frames to constrain the age of the nodes between the species:  
57  
58 474 minimum = 260 Ma and maximum = 290 Ma for *P. fucata* and *C. gigas* [84];  
59  
60  
61  
62  
63  
64  
65

1 475 minimum = 450 Ma and maximum = 480 Ma for *A. californica* (or *B. glabrata*) and *L.*  
2  
3 476 *gigantea* [85]. The calibration time (fossil record time) interval (550-610 Mya) of *O.*  
4  
5  
6 477 *bimaculoides* was adopted from previous results [86]. To identify the common  
7  
8  
9 478 expanded gene families, we compared the *P. canaliculata* and *L. fortunei* with other  
10  
11  
12 479 seven species. The gene number of orthologous group in *P. canaliculata* and *L.*  
13  
14 480 *fortunei* were two or more times than that in all of other species, respectively.  
15  
16  
17 481 Additionally, these gene families with P-value less than 0.01 were considered as  
18  
19  
20 482 expansion by z-test.  
21

### 22 23 483 **Transcriptome data analysis**

24  
25  
26  
27 484 Transcriptome reads were trimmed with the same method for genomic reads  
28  
29  
30 485 ([https://github.com/fanagislab/common\\_use](https://github.com/fanagislab/common_use)), and then mapped to the reference  
31  
32  
33 486 genome of *P. canaliculata* using TopHat v. 2.1.0 (TopHat, RRID:SCR\_013035) with  
34  
35  
36 487 default settings. The expression level of each reference gene in terms of FPKM was  
37  
38  
39 488 computed by cufflinks v2.2.1 (cufflinks, RRID:SCR\_014597). A gene was considered  
40  
41  
42 489 to be expressed if its FPKM > 0. Differential gene expression analysis was conducted  
43  
44 490 using cuffdiff v2.2.1.  
45

### 46 47 48 491 **Metagenome data analysis**

49  
50  
51 492 The Illumina raw reads were filtered by trimming the adapter sequence and  
52  
53  
54 493 low-quality regions ([https://github.com/fanagislab/common\\_use](https://github.com/fanagislab/common_use)), resulting in  
55  
56  
57 494 high-quality reads with an average error rate < 0.001. Then, the reads mapped to the  
58  
59  
60 495 following genomes by BWA-MEM were filtered out  
61

1 496 ([https://github.com/fanagislab/metagenome\\_analysis.git](https://github.com/fanagislab/metagenome_analysis.git))[87], to exclude the  
2  
3  
4 497 contaminated host, food, parasite, and human DNA sequences. The genomes include:  
5  
6 498 the *P. canaliculata* genome, the *Brassica rapa* genome, the *Oryza sativa* genome, 2  
7  
8  
9 499 *Angiostrongylus cantonensis* genomes, the *Caenorhabditis elegans* genome, the  
10  
11 500 *Schistosoma mansoni* genome, the *Clonorchis sinensis* genome, the *Fasciola hepatica*  
12  
13  
14 501 genome, the *Danio rerio* genome, and the *human hg38* genome. Finally, short reads  
15  
16  
17 502 (length < 75 bp) and unpaired reads were excluded to form a set of clean reads.  
18  
19  
20 503 The clean reads were assembled by metaSPAdes (v3.11.1) [88] in paired-end mode  
21  
22 504 for each sample. Then, gene prediction was performed on contigs longer than 500 bp  
23  
24  
25 505 by Prodigal v2.6.3 (Prodigal, RRID:SCR\_011936) [89] with the parameter “-p meta”,  
26  
27  
28 506 and gene models with cds length less than 102 bp were filtered out. A non-redundant  
29  
30  
31 507 (NR) gene set (539,344 genes) was constructed using the gene models predicted from  
32  
33  
34 508 each sample by cd-hit-est (v4.6.6) [90] with the parameter “-c 0.95 -n 10 -G 0 -a S  
35  
36  
37 509 0.9”, which adopts a greedy incremental clustering algorithm and the criteria of  
38  
39  
40 510 identity > 95% and overlap > 90% of the shorter genes. Then, the clean reads were  
41  
42  
43 511 mapped onto this NR gene set by BWA-MEM with the criteria of alignment length  
44  
45 512  $\geq$  50 bp and identity > 95%. The unmapped reads from all samples were assembled  
46  
47  
48 513 together, and the genes were predicted again. The newly predicted genes were  
49  
50  
51 514 combined with the previous gene set by cd-hit-est to obtain a new NR gene set  
52  
53 515 (1,147,339 genes). After the taxonomic assignments to the new NR gene set, 5244  
54  
55  
56 516 genes classified as Eukaryota but not fungi were removed, and the final NR gene set  
57  
58  
59 517 (1,142,095 genes) was obtained.

1 518 The taxonomic assignments of the final NR genes were made on the basis of  
2  
3 519 DIAMOND (DIAMOND, RRID:SCR\_016071) [91] protein alignment against the  
4  
5  
6 520 NCBI -NR database by CARMA3 [92]. Functional annotation was performed by  
7  
8  
9 521 aligning all the protein sequences to the KEGG [93] database (release 79) using  
10  
11  
12 522 DIAMOND and taking the best hit with the criteria of E-value < 1e-5. CAZymes were  
13  
14  
15 523 annotated with dbCAN (release 5.0) [94] using Hmmer v3.0 hmmscan (Hmmer,  
16  
17 524 RRID:SCR\_005305) [95] by taking the best hit with an E-value < 1e-18 and  
18  
19  
20 525 coverage > 0.35.

21  
22 526 The clean reads from each sample were aligned against the gene catalogue (1,142,095  
23  
24  
25 527 genes) by BWA-MEM with the criteria of alignment length  $\geq$  50 bp and identity >  
26  
27  
28 528 95%. Sequence-based gene abundance profiling was performed as previously  
29  
30  
31 529 described [96]. The taxonomic profiles of the samples were calculated by summing  
32  
33  
34 530 the gene abundance according to the taxonomic assignment result.

### 35 36 37 38 531 **Abbreviations**

39  
40  
41  
42 532 *A. californica*, *Aplysia californica*; *B. glabrata*, *Biomphalaria glabrata*; *C. gigas*,  
43  
44  
45 533 *Crassostrea gigas*; *O. bimaculoides*, *Octopus bimaculoides*; *L. anatina*, *Lingula*  
46  
47  
48 534 *anatina*; *L. fortunei*, *Limnoperna fortunei*; *L. gigantea*, *Lottia gigantea*; *P.*  
49  
50  
51 535 *canaliculata*, *Pomacea canaliculata*; *P. fucata*, *Pinctada fucata*; Hem, hemocytes; Te,  
52  
53  
54 536 testis; Ov, ovary and albumen gland; Kn, kidney; GI, gill; Hp, hepatopancreas, Em,  
55  
56  
57 537 embryo; SSR, simple sequence repeats; mya, million years ago; *BLAST*, *basic local*  
58  
59  
60 538 *alignment search tool*; SNP, single nucleotide polymorphism; PVF, Pervitelline Fluid;

1 539 Ovo, ovorubin; AFLP, amplified fragment length polymorphism; DEGs, differentially  
2  
3 540 expressed genes; LPyS, Lipopolysaccharide; iTRAQ, Isobaric Tags For Relative,  
4  
5  
6 541 Absolute Quantitation; LC-MS/MS, Liquid Chromatography-tandem Mass  
7  
8  
9 542 Spectrometry; TEs, transposable elements; LTR, long terminal repeats; LINE, long  
10  
11  
12 543 interspersed elements; SINE, short interspersed elements; UPR, Unfolded protein  
13  
14  
15 544 response; HSPs, heat shock proteins; HSF1, heat shock transcription factor 1; PERK,  
16  
17  
18 545 protein kinase RNA-like ER kinase; ATF6,activating transcription factor 6; ER,  
19  
20  
21 546 endoplasmic reticulum; CYP450s, cytochrome P450s; FMOs, flavin-containing  
22  
23  
24 547 monooxygenases; GSTs, glutathione S-transferases; ABC, ATP binding cassette; ROS,  
25  
26  
27 548 reactive oxygen species; ROI, reactive oxygen intermediates; SOD, superoxide  
28  
29  
30 549 dismutase; CAT, catalase; Prx, peroxidase; GPX, glutathione peroxidase; TNFR,  
31  
32  
33 550 tumor necrosis factor receptor; NR, non-redundant genes; ORF, open reading frame;  
34  
35  
36 551 Kos, orthologous groups; CAZymes, carbohydrate active enzymes; GH, Glycoside  
37  
38  
39 552 Hydrolase.

#### 41 553 **Availability of data and materials**

42  
43  
44  
45 554 Tables S1 to S12 and Figures S1 to S6 are available in the supplementary information  
46  
47  
48 555 file. The raw sequencing data has been deposited in DDBJ/EMBL/GenBank under  
49  
50  
51 556 project accession PRJNA427478, SRR6425828 for genomic Illumina\_PE125  
52  
53  
54 557 sequencing data, SRR6425829 for genomic Illumina\_PE150 sequencing data,  
55  
56  
57 558 SRR6425827 for genomic PacBio sequencing data, SRR6429132~SRR6429164 for  
58  
59  
60 559 transcriptome sequencing data, and SRR6472920~SRR6472925 for gut microbiome

1 560 data. Other supporting data, including genome assemblies, annotations, phylogenetic  
2  
3 561 tree files and BUSCO results, are available via the *GigaScience* repository GigaDB  
4  
5  
6 562 [97].  
7  
8  
9

### 10 563 **Authors' contributions**

11  
12  
13  
14  
15 564 WF, WQ and CL conceived the study and designed the experiments. CL performed  
16  
17  
18 565 the genome sequencing and assembly, BL performed annotation and evolutionary  
19  
20  
21 566 analysis. CL performed the stress tolerance analysis, YR performed the reproduction  
22  
23  
24 567 analysis, YZ performed the metagenome analysis. HW, SL, FJ, LY, XQ provided  
25  
26  
27 568 suggestions and helped checking. CL, WF, BL, YR, YZ wrote the manuscript, and GZ  
28  
29 569 helped revising the manuscript. All authors read and approved the final manuscript.  
30  
31

### 32 33 570 **Competing interests**

34  
35  
36  
37  
38 571 The authors declare that they have no competing interests.  
39  
40  
41

### 42 572 **Acknowledgements**

43  
44  
45  
46  
47 573 This project is supported by the National key research and development program of  
48  
49  
50 574 China (2016YFC1200600), Shenzhen science and technology program  
51  
52  
53 575 (JCYJ20150630165133395), Fund of Key Laboratory of Shenzhen  
54  
55  
56 576 (ZDSYS20141118170111640), and The Agricultural Science and Technology  
57  
58 577 Innovation Program (ASTIP) of Chinese Academy of Agricultural Sciences(CAAS) &  
59  
60  
61  
62  
63  
64  
65



1 578 Elite Youth Program of Chinese Academy of Agricultural Sciences. We thank  
 2  
 3 579 Fanghao Wan, Jue Ruan, Yutao Xiao for providing constructive suggestions to this  
 4  
 5  
 6 580 project.  
 7  
 8  
 9

10  
 11 **581 Legends of tables and figures**  
 12  
 13  
 14

15 **582 Tables**  
 16

17 **583 Table 1. Summary of assembly and annotation of mollusc genomes**  
 18

| Genome feature             | <i>P. canaliculata</i> | <i>L. gigantea</i> | <i>A. californica</i> | <i>B. glabrata</i> | <i>C. gigas</i> | <i>O. bimaculoides</i> |
|----------------------------|------------------------|--------------------|-----------------------|--------------------|-----------------|------------------------|
| Assembled sequences (bp)   | 440,071,717            | 359,505,668        | 927,310,431           | 916,377,450        | 557,735,934     | 23,381,887,882         |
| Contig N50 size (bp)       | 1,072,857              | 94,165             | 9,817                 | 18,978             | 37,218          | 5,982                  |
| Contig N90 size (bp)       | 303,904                | 10,180             | 1,626                 | 5,132              | 11,109          | 1,606                  |
| Scaffold N50 size (bp)     | 31,531,291             | 1,870,055          | 917,541               | 48,059             | 401,685         | 475,182                |
| Scaffold N90 size (bp)     | 23,662,357             | 74,480             | 207,390               | 817                | 68,181          | 79,088                 |
| GC content (%)             | 40.3                   | 33.3               | 40.3                  | 36.0               | 33.4            | 36                     |
| No. of gene models         | 21,533                 | 23,824             | 19,909                | 14,224             | 28,402          | 15,814                 |
| Avg. CDS length (bp)       | 1,497                  | 1,136              | 1,568                 | 1,066              | 1,472           | 1,535                  |
| BUSCO (%)                  | 98.9                   | 98.4               | 98.7                  | 72.8               | 99.4            | 98.7                   |
| Transposable elements (bp) | 49,579,006             | 37,369,817         | 202,174,499           | 189,550,886        | 103,381,274     | 737,398,096            |
| Tandem repeat (bp)         | 873,801                | 257,674            | 8,263,822             | 2,145,821          | 590,907         | 62,633,792             |

19  
 20  
 21  
 22  
 23  
 24  
 25  
 26  
 27  
 28  
 29  
 30  
 31  
 32  
 33  
 34  
 35  
 36  
 37  
 38  
 39 **584 Figures**  
 40

41 **585 Figure 1. The genome characteristics of *P. canaliculata*.** (a) Circos plot showing the  
 42  
 43  
 44 586 genomic features. Track 1: 14 linkage groups of the genome; Track 2: distribution of  
 45  
 46  
 47 587 transposon elements in chromosomes; Track 3: protein-coding genes located on  
 48  
 49  
 50 588 chromosomes; Track 4: distribution of GC contents. (b) A genome-wide contact  
 51  
 52  
 53 589 matrix from Hi-C data between each pair of the 14 chromosomes using a 100 kb  
 54  
 55  
 56 590 window size. The colour value indicates the base 2 logarithm of the number of valid  
 57  
 58  
 59 591 reads ( $\log_2(\text{valid reads})$ ). (c) Distribution of CDS length in six closely related species.  
 60  
 61  
 62  
 63  
 64  
 65

1 592 **Figure 2. Evolutionary genomic analysis of *P. canaliculata*.** (a) Phylogenetic  
2  
3 593 placement of *P. canaliculata* within the dated tree of molluscs. The estimated  
4  
5  
6 594 divergence time is shown at each branching point, and *P. canaliculata* is shown in red.  
7  
8  
9 595 (b) Distribution of divergence rate for the class of DNA transposons in molluscs  
10  
11 596 genomes. The divergence rate was calculated by comparing all TE sequences  
12  
13 597 identified in the genome to the corresponding consensus sequence in each TE  
14  
15 598 subfamily. The red arrow indicates that *P. canaliculata* and *C. gigas* had a recent  
16  
17 599 explosion of TEs at a divergence rate of ~4%.  
18  
19  
20  
21

22 600 **Figure 3. The cellular homeostasis system in *P. canaliculata*.** The unfolded protein  
23  
24 601 response (UPR) system includes HSPs and HSF in the heat shock response and CNX,  
25  
26 602 NEF, GRP94, BIP, HSP40, ATF6, IRE1, PERK, COP2, XBP, ATF4, TRAM and  
27  
28 603 Derlin in the endoplasmic reticulum unfolded protein response (UPR-ERAD).  
29  
30 604 Apoptotic pathways include XIAPs, Bcl2, caspases, TNFR, and FADD. The  
31  
32 605 antioxidant systems include PRX, SOD, CAT and GPX. The xenobiotic  
33  
34 606 biotransformation system includes EPHX3, P450, FMO and ABC transporter. The  
35  
36 607 colours of the boxes for gene families represent the degree of upregulation  
37  
38 608 (FPKM-stimulus/FPKM-control) as an overall result of stress, including heat, cold,  
39  
40 609 heavy metal and air exposure. Pathways and genes were obtained based on KEGG  
41  
42 610 annotation.  
43  
44  
45  
46  
47  
48  
49  
50  
51

52 611 **Figure 4. The expansion of the P450 gene family in *P. canaliculata*.** (a)  
53  
54 612 Phylogenetic tree demonstrating orthologous and paralogous relationships of all P450  
55  
56 613 genes from eight species including *P. canaliculata*, *A. californica*, *B. glabrata*, *C.*  
57  
58  
59  
60  
61  
62  
63  
64  
65

1 614 *gigas*, *L. fortunei*, *L. gigantea*, *O. bimaculoides* and *P. fucata*. P450 genes from eight  
2  
3 615 species were obtained based on Pfam annotation (Interpro) with an E-value of  $10^{-5}$ .  
4  
5  
6 616 Clades are labeled by P450 subfamily names. The tree was constructed using the  
7  
8  
9 617 maximum likelihood method in MEGA7, and the branch length scale indicates the  
10  
11 618 average number of residue substitutions per site. (b) Phylogenetic tree of P450 genes  
12  
13 619 in *P. canaliculata*, which is a subset of the phylogenetic tree for the 7 species, and  
14  
15 620 their heat map of expression (FPKM) in seven tissues (Hem, hemocytes; Te, testis; Ov,  
16  
17 621 ovary and albumen gland; Kn, kidney; Gl, gill; Hp, hepatopancreas; Em, embryo) and  
18  
19 622 heat map of induced expression (FPKM-stimulus/FPKM-control) under stress (Con:  
20  
21 623 control; heat; cold; Hm: heavy metal; Exp: air exposure).

22  
23  
24  
25  
26  
27  
28 624 **Figure 5. The composition and expression of the *P. canaliculata* perivitellins in**  
29  
30 625 **different tissues.** (a) Perivitelline fluid (PVF) lies under the eggshell and surrounds  
31  
32 626 the embryo. It contains carbohydrates, lipids, and proteins. The proteins are also  
33  
34 627 known as perivitellins and are classified into three categories, PcOvo, PcPV2, and  
35  
36 628 PcPV3. (b) The displayed expression value of PVF proteins is the base 10 logarithm  
37  
38 629 of FPKM ( $\log_{10}$ FPKM). The genes marked in red encode perivitellins. The 7 tissues  
39  
40 630 examined are abbreviated as follows: Hem, hemocytes; Te, testis; Ov, ovary and  
41  
42 631 albumen gland; Kn, kidney; Gl, gill; Hp, hepatopancreas; Em, embryo.

## 52 632 **References**

- 53  
54  
55  
56 633 1. Lowe S, Browne M, Boudjelas S, de Poorter M. 100 of the World's Worst Invasive Alien  
57  
58 634 Species: A selection from the Global Invasive Species Database. Auckland, New Zealand:

1 635 World Conservation Union (IUCN); 2000.

2

3 636 2. Ranamukhaarachchi SL, Wickramasinghe S. Golden apple snails in the world:

4

5

6 637 introduction, impact, and control measures. *Global advances in ecology and management*

7

8

9 638 of golden apple snails. 2006:133-52.

10

11 639 3. Naylor R. *Invasions in Agriculture: Assessing the Cost of the Golden Apple Snail in Asia.*

12

13

14 640 Royal Swedish Academy of Sciences. 1996;25:443-8.

15

16

17 641 4. Berthold T. *Vergleichende Anatomie, Phylogenie und historische Biogeographie der*

18

19

20 642 *Ampullariidae: (Mollusca, Gastropoda).* 1991.

21

22

23 643 5. Howells RG, Burlakova LE, Karatayev AY, Marfurt RK, Burks RL. Native and

24

25 644 introduced Ampullariidae in North America: History, status, and ecology. 2006:73-112.

26

27

28 645 6. Halwart M, Bartley DM. International mechanisms for the control and responsible use of

29

30

31 646 alien species in aquatic ecosystems, with special reference to the golden apple snail. Los

32

33

34 647 Baños, Philippines: Philippine Rice Research Institute (PhilRice); 2006.

35

36 648 7. López MA, Altaba CR, Andree KB, López V. First invasion of the Apple snail *Pomacea*

37

38

39 649 *insularum* in Europe. *Tentacle.* 2010;18:26-8.

40

41

42 650 8. Estebenet AL, Martín PR. *Pomacea canaliculata* (Gastropoda: Ampullariidae): life-history

43

44

45 651 traits and their plasticity. *Biocell* 2002;26:83-9.

46

47

48 652 9. Lach L. The spread of the introduced freshwater apple snail *Pomacea canaliculata*

49

50 653 (Lamarck) (Gastropoda Ampullariidae) on Oahu, Hawaii. *Bishop Museum Occasional*

51

52

53 654 *Papers.* 1999;58:66-71.

54

55

56 655 10. Yusa Y, Sugiura N, Wada T. Predatory Potential of Freshwater Animals on an Invasive

57

58

59 656 Agricultural Pest, the Apple Snail *Pomacea canaliculata* (Gastropoda: Ampullariidae), in

1 657 Southern Japan. *Biol Invasions*. 2006;8:137-47.

2

3 658 11. Lach L, Britton DK, Rundell RJ, Cowie RH. Food Preference and Reproductive Plasticity

4

5

6 659 in an Invasive Freshwater Snail. *Biol Invasions*. 2000;2:279-88.

7

8

9 660 12. Mochida O. Spread of freshwater *Pomacea* snails (Pilidae, Mollusca) from Argentina to

10

11 661 Asia. *Micronesica*. 1991;3 51-62.

12

13

14 662 13. Shan L, Zhang Y, Steinmann P, Zhou X. Emerging Angiostrongyliasis in Mainland China.

15

16 663 *Emerg Infect Dis*. 2008;14:161-4.

17

18

19 664 14. Caldeira RL, Mendonca CL, Goveia CO, Lenzi HL, Graeff-TeixeiraC Lima WS, et al.

20

21 665 First record of molluscs naturally infected with *Angiostrongylus cantonensis* (Chen, 1935)

22

23 666 (Nematoda: Metastrongylidae) in Brazil. *Memórias do Instituto Oswaldo Cruz*.

24

25 667 2007;102:887-9.

26

27

28 668 15. McMichael AJ, Beaglehole R. The changing global context of public health. *Lancet*

29

30 669 (London, England). 2000;356:495-9.

31

32

33 670 16. Chapman A. Numbers of Living Species in Australia and the World. *Australian Biological*

34

35 671 *Resources Study*; 2009.

36

37

38 672 17. Lindberg DR, Ponder WF, Haszprunar G. The Mollusca: relationships and patterns from

39

40 673 their first half-billion years. Oxford University Press, Oxford; 2004.

41

42

43 674 18. Hayes KA, Cowie RH, Thiengo SC. A global phylogeny of apple snails: Gondwanan

44

45 675 origin, generic relationships, and the influence of outgroup choice (Caenogastropoda:

46

47 676 Ampullariidae). *Biol J Linn Soc Lond*. 2009;98:61-76.

48

49

50 677 19. Matsukura K, Tsumuki H, Izumi Y, Wada T. Physiological response to low temperature in

51

52 678 the freshwater apple snail, *Pomacea canaliculata* (Gastropoda: Ampullariidae). *J Exp*

53

54

55

56

57

58

59

60

61

62

63

64

65

1 679 Biol. 2009;212:2558-63.

2

3 680 20. Yusa Y, Wada T, Takahashi S. Effects of dormant duration, body size, self-burial and

4

5

6 681 water condition on the long-term survival of the apple snail, *Pomacea canaliculata*

7

8

9 682 (Gastropoda: Ampullariidae). Appl Entomol Zool. 2006;41:627-32.

10

11 683 21. Seuffert ME, Burela S, Martín PR. Influence of water temperature on the activity of the

12

13

14 684 freshwater snail *Pomacea canaliculata* (Caenogastropoda: Ampullariidae) at its

15

16

17 685 southernmost limit (Southern Pampas, Argentina). Journal of Thermal Biology. 2010;

18

19

20 686 35:77-84.

21

22 687 22. Kruatrachue M, Sumritdee C, Pokethitiyook P, Singhakaew S. Histopathological effects

23

24

25 688 of contaminated sediments on golden apple snail (*Pomacea canaliculata*, Lamarck 1822).

26

27

28 689 Bull Environ Contam Toxicol. 2011;86:610-4.

29

30

31 690 23. Dreon MS, Frassa MV, Ceolín M, Ituarte S, Qiu JW, Sun J, et al. Novel animal defenses

32

33

34 691 against predation: a snail egg neurotoxin combining lectin and pore-forming chains that

35

36

37 692 resembles plant defense and bacteria attack toxins. PLoS One. 2013;8:e63782.

38

39 693 doi:10.1371/journal.pone.0063782.

40

41

42 694 24. Ottaviani E, Caselgrandi E, Fontanili P, Franceschi C. Evolution, immune responses and

43

44

45 695 stress: studies on molluscan cells. Acta Biol Hung. 1992;43:293-8.

46

47

48 696 25. Ottaviani E, Accorsi A, Rigillo G, Malagoli D, Blom JM, Tascetta F. Epigenetic

49

50

51 697 modification in neurons of the mollusc *Pomacea canaliculata* after immune challenge.

52

53 698 Brain Res. 2013;1537:18-26.

54

55

56 699 26. Mercado Laczkó AC, Lopretto EC. Estudio cromosómico y cariotípico de *pomacea*

57

58 700 *canaliculata* (Lamarck, 1801) (Gastropoda, Ampullariidae). Revista del Museo Argentino

1 701 de Ciencias Naturales "Bernardino Rivadavia" Hidrobiología. 1998;8:15-20.

2

3 702 27. Xu J, Han X, Li N, Yu J, Qian C, Bao Z. Analysis of genetic diversity of three geographic

4

5

6 703 populations of *Pomacea canaliculata* by AFLP. Acta Ecol Sin. 2009;29:4119- 26.

7

8

9 704 28. Chen L, Xu H, Li H, Wu J, Ding H, Liu Y. Isolation and characterization of sixteen

10

11 705 polymorphic microsatellite loci in the golden apple snail *Pomacea canaliculata*. Int J Mol

12

13 706 Sci. 2011;12:5993-8.

14

15

16

17 707 29. Mu X, Hou G, Song H, Xu P, Luo D, Gu D, et al. Transcriptome analysis between

18

19 708 invasive *Pomacea canaliculata* and indigenous *Cipangopaludina cahayensis* reveals

20

21 709 genomic divergence and diagnostic microsatellite/SSR markers. BMC Genet. 2015;16:12.

22

23

24

25 710 30. Sun J, Wang M, Wang H, Zhang H, Zhang X, Thiyagarajan V, et al. De novo assembly of

26

27 711 the transcriptome of an invasive snail and its multiple ecological applications. Mol Ecol

28

29 712 Resour. 2012;12:1133-44.

30

31

32

33 713 31. Mu H, Sun J , Fang L, Luan T, Williams GA, Cheung SG, et al. Genetic Basis of

34

35 714 Differential Heat Resistance between Two Species of Congeneric Freshwater Snails:

36

37 715 Insights from Quantitative Proteomics and Base Substitution Rate Analysis. J Proteome

38

39 716 Res. 2015;14:4296-308.

40

41

42

43

44 717 32. Yang L, Cheng TY, Zhao FY. Comparative profiling of hepatopancreas transcriptomes in

45

46 718 satiated and starving *Pomacea canaliculata*. BMC Genet. 2017;18:18.

47

48

49

50 719 33. Xiong YM, Yan ZH, Zhang JE, Li HY. Analysis of albumen gland proteins suggests

51

52 720 survival strategies of developing embryos of *Pomacea canaliculata*. Molluscan Res.

53

54 721 2017:1-6.

55

56

57

58 722 34. Sun J, Mu H , Zhang H, Chandramouli KH, Qian PY, Wong CK, et al. Understanding the

59

60

61

62

63

64

65

1 723 regulation of estivation in a freshwater snail through iTRAQ-based comparative  
2  
3 724 proteomics. J Proteome res. 2013;12:5271-80.  
4  
5  
6 725 35. Sun J, Zhang H, Wang H, Heras H, Dreon MS, Ituarte S, et al. First proteome of the egg  
7  
8  
9 726 perivitelline fluid of a freshwater gastropod with aerial oviposition. J Proteome Res.  
10  
11 727 2012;11:4240-8.  
12  
13  
14 728 36. Aplysia Genome Project. Broad Institute. Vertebrate Biology Group. 2009.  
15  
16  
17 729 <https://www.broadinstitute.org/aplysia/aplysia-genome-project>  
18  
19  
20 730 37. Zhang G, Fang X, Guo X, Li L, Luo R, Xu F, et al. The oyster genome reveals stress  
21  
22 731 adaptation and complexity of shell formation. Nature. 2012;490:49-54.  
23  
24  
25 732 38. Du X, Fan G, Jiao Y, Zhang H, Guo X, Huang R, et al. The pearl oyster *Pinctada fucata*  
26  
27 733 *martensii* genome and multi-omic analyses provide insights into biomineralization.  
28  
29 734 *Gigascience*. 2017;6:1-12.  
30  
31  
32  
33 735 39. Takeuchi T, Kawashima T, Koyanagi R, Gyoja F, Tanaka M, Ikuta T, et al. Draft genome  
34  
35 736 of the pearl oyster *Pinctada fucata*: a platform for understanding bivalve biology. DNA  
36  
37 737 Res. 2012;19:117-30.  
38  
39  
40  
41 738 40. Simakov O, Marletaz F, Cho SJ, Edsinger-Gonzales E, Havlak P, Hellsten U, et al.  
42  
43 739 Insights into bilaterian evolution from three spiralian genomes. Nature. 2013;493:526-31.  
44  
45  
46  
47 740 41. Albertin CB, Simakov O, Mitros T, Wang ZY, Pungor JR, Edsinger-Gonzales E, et al. The  
48  
49 741 octopus genome and the evolution of cephalopod neural and morphological novelties.  
50  
51 742 Nature. 2015;524:220-4.  
52  
53  
54  
55 743 42. Uliano-Silva M, Dondero F, Dan Otto T, Costa I, Lima NCB, Americo JA, et al. A  
56  
57 744 hybrid-hierarchical genome assembly strategy to sequence the invasive golden mussel  
58  
59  
60  
61  
62  
63  
64  
65



1 745 Limnoperna fortunei. Gigascience. 2017. doi: 10.1093/gigascience/gix128  
2  
3 746 43. Adema CM, Hillier LW, Jones CS, Loker ES, Knight M, Minx P, et al. Corrigendum:  
4  
5  
6 747 Whole genome analysis of a schistosomiasis-transmitting freshwater snail. Nat Commun.  
7  
8  
9 748 2017;8:16153.  
10  
11 749 44. Liu B, Shi Y, Yuan J, Hu X, Zhang H, Li N, et al. Estimation of genomic characteristics  
12  
13  
14 750 by analyzing k-mer frequency in de novo genome projects. Quantitative Biology  
15  
16  
17 751 2013:arXiv:1308.2012 [q-bio.GN].  
18  
19  
20 752 45. Guindon S, Dufayard JF, Lefort V, Anisimova M, Hordijk W, Gascuel O. New algorithms  
21  
22  
23 753 and methods to estimate maximum-likelihood phylogenies: assessing the performance of  
24  
25  
26 754 PhyML 3.0. Syst Biol 2010;59:307-21. doi:10.1093/sysbio/syq010.  
27  
28 755 46. Yang Z. PAML 4: phylogenetic analysis by maximum likelihood. Mol Biol Evol.  
29  
30  
31 756 2007;24:1586-91. doi:10.1093/molbev/msm088.  
32  
33  
34 757 47. Emms DM, Kelly S. OrthoFinder: solving fundamental biases in whole genome  
35  
36  
37 758 comparisons dramatically improves orthogroup inference accuracy. Genome Biol.  
38  
39  
40 759 2015;16:157. doi:10.1186/s13059-015-0721-2.  
41  
42 760 48. Feschotte C, Wessler SR. Mariner-like transposases are widespread and diverse in  
43  
44  
45 761 flowering plants. Proc Natl Acad Sci U S A 2002;99:280-5.  
46  
47  
48 762 49. Hua-Van A, Le Rouzic A, Boutin TS, Filée J, Capy P. The struggle for life of the  
49  
50  
51 763 genome's selfish architects. Biol Direct. 2011;6:19.  
52  
53 764 50. Werren JH. Selfish genetic elements, genetic conflict, and evolutionary innovation. Proc  
54  
55  
56 765 Natl Acad Sci U S A. 2011;108:10863-70.  
57  
58 766 51. Chrousos GP. Stress and disorders of the stress system. Nat Rev Endocrinol.

1 767 2009;5:374-81.

2

3 768 52. Vabulas RM, Raychaudhuri S, Hayer-Hartl M. Protein folding in the cytoplasm and the

4

5

6 769 heat shock response. *Cold Spring Harbor perspectives in biology*. 2010;2:a004390.

7

8

9 770 53. Chen B, Retzlaff M, Roos T, Frydman J. Cellular Strategies of Protein Quality Control.

10

11 771 *Cold Spring Harbor Perspectives in Biology*. 2011;3:a004374.

12

13

14 772 54. Korennykh A and Walter P. Structural basis of the unfolded protein response. *Annu Rev*

15

16

17 773 *Cell Dev Biol*. 2012;28:251-77.

18

19

20 774 55. Chambers JE and Yarbrough JD. Xenobiotic biotransformation systems in fishes. *Comp*

21

22

23 775 *Biochem Physiol C*. 1976;55:77-84.

24

25

26 776 56. Mello DF, de Oliveira ES, Vieira RC, Simoes E, Trevisan R, Dafre AL, et al. Cellular and

27

28 777 Transcriptional Responses of *Crassostrea gigas* Hemocytes Exposed in Vitro to

29

30

31 778 Brevetoxin (PbTx-2) *Mar Drugs*. 2012;10: 583-97.

32

33

34 779 57. Boutet I, Tanguy A, Moraga D. Characterisation and expression of four mRNA sequences

35

36

37 780 encoding glutathione S-transferases pi, mu, omega and sigma classes in the Pacific oyster

38

39 781 *Crassostrea gigas* exposed to hydrocarbons and pesticides. *Mar Biol* 2004;146:53-64.

40

41

42 782 58. Deeley RG, Westlake C, Cole SP. Transmembrane transport of endo- and xenobiotics by

43

44

45 783 mammalian ATP-binding cassette multidrug resistance proteins. *Physiol Rev*.

46

47 784 2006;86:849-99.

48

49

50 785 59. Liu C, Zhang T, Wang L, Wang M, Wang W, Jia Z, et al. The modulation of extracellular

51

52

53 786 superoxide dismutase in the specifically enhanced cellular immune response against

54

55

56 787 secondary challenge of *Vibrio splendidus* in Pacific oyster (*Crassostrea gigas*). *Dev*

57

58

59 788 *Comp Immunol*. 2016;63:163-70.

60

61

62

63

64

65

- 1 789 60. Lamb DC, Lei L, Warrilow AG, Lepesheva GI, Mullins JG, Waterman MR, et al. The first  
2  
3 790 virally encoded cytochrome p450. J Virol. 2009;83:8266-9.  
4  
5  
6 791 61. Urlacher VB, Girhard M. Cytochrome P450 monooxygenases: an update on perspectives  
7  
8  
9 792 for synthetic application. Trends Biotechnol. 2012;30:26-36.  
10  
11 793 62. Sanderson T, van den Berg M. Topic 3.1: Interactions of xenobiotics with the steroid  
12  
13 794 hormone biosynthesis pathway. Pure Appl Chem. 2003;75:1957-71.  
14  
15  
16 795 63. Goldstone JV, McArthur AG, Kubota A, Zanette J, Parente T, Jönsson ME, et al.  
17  
18 796 Identification and developmental expression of the full complement of Cytochrome P450  
19  
20 797 genes in Zebrafish. BMC Genomics. 2010;11:643.  
21  
22  
23 798 64. Chuang SS, Helvig C, Taimi M, Ramshaw HA, Collop AH, Amad M, et al. CYP2U1, a  
24  
25 799 novel human thymus- and brain-specific cytochrome P450, catalyzes omega- and  
26  
27 800 (omega-1)-hydroxylation of fatty acids. J Biol Chem. 2004;279:6305-14.  
28  
29  
30  
31 801 65. Fleming I. The pharmacology of the cytochrome P450 epoxygenase/soluble epoxide  
32  
33 802 hydrolase axis in the vasculature and cardiovascular disease. Pharmacol Rev.  
34  
35 803 2014;66:1106-40.  
36  
37  
38  
39 804 66. Zhang G, Kodani S, Hammock BD. Stabilized epoxygenated fatty acids regulate  
40  
41 805 inflammation, pain, angiogenesis and cancer. Prog Lipid Res. 2014;53:108-23.  
42  
43  
44 806 67. de Jong-Brink M, Boer HH, Joosse J. Mollusca. In: Adiyodi, K.G., Adiyodi,  
45  
46 807 R.G. (Eds.), Reproductive Biology of invertebrates. Oogenesis oviposition and  
47  
48 808 oosorption, vol. 1. John Wiley & Sons Ltd., New York, 1983; pp. 297-355.  
49  
50  
51  
52 809 68. Garin CF, Heras H, Pollero RJ. Lipoproteins of the egg perivitelline fluid of *Pomacea*  
53  
54 810 *canaliculata* snails (Mollusca: Gastropoda). J Exp Zool. 1996;276:307-14.  
55  
56  
57  
58  
59  
60  
61  
62  
63  
64  
65

1 811 69. Dreon MS, Schinella G, Heras H, Pollero RJ. Antioxidant defense system in the apple  
2  
3 812 snail eggs, the role of ovorubin. Arch Biochem Biophys. 2004;422:1-8.  
4  
5  
6 813 70. Dreon MS, Ituarte S, Heras H. The role of the proteinase inhibitor ovorubin in apple snail  
7  
8 814 eggs resembles plant embryo defense against predation. PLoS One. 2010;5:e15059.  
9  
10 815 doi:10.1371/journal.pone.0015059.  
11  
12  
13  
14 816 71. Cardoso AM, Cavalcante JJV, Vieira RP, Lima JL, Grieco MAB, Clementino MM, et al.  
15  
16  
17 817 Gut Bacterial Communities in the Giant Land Snail *Achatina fulica* and Their  
18  
19 818 Modification by Sugarcane-Based Diet. Plos One. 2012;7 doi:ARTN  
20  
21 819 e3344010.1371/journal.pone.0033440.  
22  
23  
24  
25 820 72. Cardoso AM, Cavalcante JJV, Cantão ME, Thompson CE, Flatschart RB, Glogauer A, et  
26  
27 821 al. Metagenomic Analysis of the Microbiota from the Crop of an Invasive Snail Reveals a  
28  
29 822 Rich Reservoir of Novel Genes. Plos One. 2012;7 doi:ARTN  
30  
31 823 e4850510.1371/journal.pone.0048505.  
32  
33  
34  
35  
36 824 73. Cabrera G, Pérez R, Gómez JM, Ábalos A, Cantero D. Toxic effects of dissolved heavy  
37  
38 825 metals on *Desulfovibrio vulgaris* and *Desulfovibrio* sp strains. J Hazard Mater  
39  
40 826 2006;135:40-6. doi:10.1016/j.jhazmat.2005.11.058.  
41  
42  
43  
44 827 74. Finlay JA, Allan VJ, Conner A, Callow ME, Basnakova G, Macaskie LE. Phosphate  
45  
46 828 release and heavy metal accumulation by biofilm-immobilized and chemically-coupled  
47  
48 829 cells of a *Citrobacter* sp. pre-grown in continuous culture. Biotechnol Bioeng.  
49  
50 830 1999;63:87-97.  
51  
52  
53  
54  
55 831 75. Valls M, de Lorenzo V, Gonzalez-Duarte R, Atrian S. Engineering outer-membrane  
56  
57 832 proteins in *Pseudomonas putida* for enhanced heavy-metal bioadsorption. J Inorg  
58  
59  
60  
61  
62  
63  
64  
65

1 833 Biochem. 2000;79:219-23.  
2  
3 834 76. Pinheiro GL, Correa RF, Cunha RS, Cardoso AM, Chaia C, Clementino MM, et al.  
4  
5  
6 835 Isolation of aerobic cultivable cellulolytic bacteria from different regions of the  
7  
8  
9 836 gastrointestinal tract of giant land snail *Achatina fulica*. Front Microbiol. 2015;6 doi:Artn  
10  
11 837 86010.3389/Fmicb.2015.00860.  
12  
13  
14 838 77. Zoetendal EG, Heilig HG, Klaassens ES, Booijink CC, Kleerebezem M, Smidt H, et al.  
15  
16  
17 839 Isolation of DNA from bacterial samples of the human gastrointestinal tract. Nature  
18  
19  
20 840 protocols 2006, 1(2): 870-873.  
21  
22  
23 841 78. Benson G. Tandem repeats finder: a program to analyze DNA sequences. Nucleic Acids  
24  
25 842 Res. 1999;27:573-80.  
26  
27  
28 843 79. Haas BJ, Salzberg SL, Zhu W, Pertea M, Allen JE, Orvis J, et al. Automated eukaryotic  
29  
30  
31 844 gene structure annotation using EVIDENCEModeler and the Program to Assemble Spliced  
32  
33  
34 845 Alignments. Genome Biol. 2008;9:R7.  
35  
36  
37 846 80. Quevillon E, Silventoinen V, Pillai S, Harte N, Mulder N, Apweiler R, et al. InterProScan:  
38  
39 847 protein domains identifier. Nucleic Acids Res. 2005;33:W116-20.  
40  
41  
42 848 81. Kanehisa M, Goto S, Sato Y, Furumichi M, Tanabe M. KEGG for integration and  
43  
44  
45 849 interpretation of large-scale molecular data sets. Nucleic Acids Res. 2012;40:D109-D14.  
46  
47  
48 850 82. Edgar RC. MUSCLE: multiple sequence alignment with high accuracy and high  
49  
50  
51 851 throughput. Nucleic Acids Res. 2004;32:1792-7.  
52  
53  
54 852 83. Darriba D, Taboada GL, Doallo R, Posada D. ProtTest 3: fast selection of best-fit models  
55  
56 853 of protein evolution. Bioinformatics. 2011;27:1164-5. doi:10.1093/bioinformatics/btr088.  
57  
58  
59 854 84. Sun J, Zhang Y, Xu T, Zhang Y, Mu H, Zhang Y, et al. Adaptation to deep-sea  
60  
61  
62  
63  
64  
65

1 855 chemosynthetic environments as revealed by mussel genomes. *Nature Ecology &*  
2  
3 856 *Evolution*. 2017; 1: 121.  
4  
5  
6 857 85. Benton MJ, Donoghue PCJ, Asher RJ. in *The Timetree of Life:Calibrating and*  
7  
8  
9 858 *Constraining Molecular Clocks* (eds Hedges, S. B. & Kumar, S.)35–86 (Oxford Univ.  
10  
11 859 Press, 2009.  
12  
13  
14 860 86. Zapata F, Wilson NG, Howison M, Andrade SC, Jörger KM, Schrödl M, et al.  
15  
16  
17 861 *Phylogenomic analyses of deep gastropod relationships reject Orthogastropoda*. *Proc Biol*  
18  
19 862 *Sci*. 2014;281(1794):20141739. doi: 10.1098/rspb.2014.1739.  
20  
21  
22 863 87. Li H and Durbin R. Fast and accurate short read alignment with Burrows-Wheeler  
23  
24 864 transform. *Bioinformatics*. 2009;25:1754-60.  
25  
26  
27 865 88. Nurk S, Meleshko D, Korobeynikov A, Pevzner PA. metaSPAdes: a new versatile  
28  
29 866 metagenomic assembler. *Genome Res*. 2017;27:824-34.  
30  
31  
32 867 89. Hyatt D, LoCascio PF, Hauser LJ, Uberbacher EC. Gene and translation initiation site  
33  
34 868 prediction in metagenomic sequences. *Bioinformatics*. 2012;28:2223-30.  
35  
36  
37 869 90. Fu L, Niu B, Zhu Z, Wu S, Li W. CD-HIT: accelerated for clustering the next-generation  
38  
39 870 sequencing data. *Bioinformatics*. 2012;28:3150-2.  
40  
41  
42 871 91. Buchfink B, Chao X, Huson DH. Fast and sensitive protein alignment using DIAMOND.  
43  
44 872 *Nat Methods*. 2015;12:59-60.  
45  
46  
47 873 92. Gerlach W and Stoye J. Taxonomic classification of metagenomic shotgun sequences  
48  
49 874 with CARMA3. *Nucleic Acids Res*. 2011;39 doi:Artn E9110.1093/Nar/Gkr225.  
50  
51  
52 875 93. Kanehisa M, Goto S, Kawashima S, Okuno Y, Hattori M. The KEGG resource for  
53  
54 876 deciphering the genome. *Nucleic Acids Res*. 2004;32:D277-80.  
55  
56  
57  
58  
59  
60  
61  
62  
63  
64  
65

1 877 94. Yin Y, Mao X, Yang J, Chen X, Mao F, Xu Y. dbCAN: a web resource for automated  
2  
3 878 carbohydrate-active enzyme annotation. *Nucleic Acids Res.* 2012;40:W445-51.  
4  
5  
6 879 95. Eddy SR. Accelerated Profile HMM Searches. *Plos Comput Biol.* 2011;7 doi:ARTN  
7  
8  
9 880 e100219510.1371/journal.pcbi.1002195.  
10  
11 881 96. Qin JJ, Li YR, Cai ZM, Li SH, Zhu JF, Zhang F, et al. A metagenome-wide association  
12  
13 882 study of gut microbiota in type 2 diabetes. *Nature.* 2012;490:55-60.  
14  
15  
16  
17 883 97. Liu C, Zhang Y, Ren Y, Wang H, Li S, Jiang F, et al. Supporting data for "The genome of the  
18  
19  
20 884 golden apple snail *Pomacea canaliculata* provides insight into stress tolerance and invasive  
21  
22 885 adaptation". *GigaScience Database.* 2018. <http://dx.doi.org/10.5524/100485>  
23  
24  
25  
26  
27  
28  
29  
30  
31  
32  
33  
34  
35  
36  
37  
38  
39  
40  
41  
42  
43  
44  
45  
46  
47  
48  
49  
50  
51  
52  
53  
54  
55  
56  
57  
58  
59  
60  
61  
62  
63  
64  
65

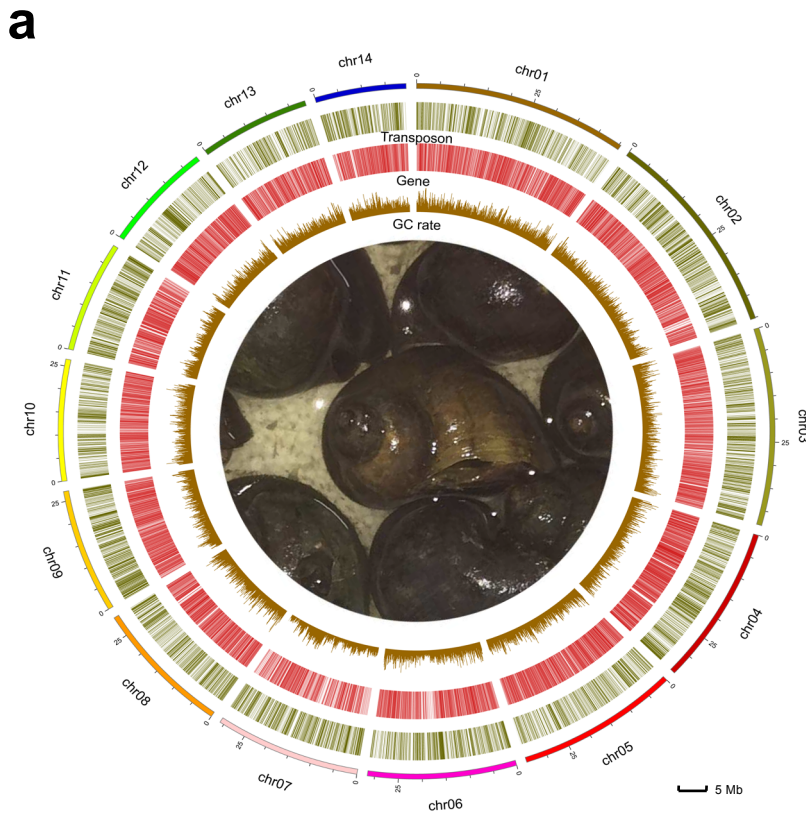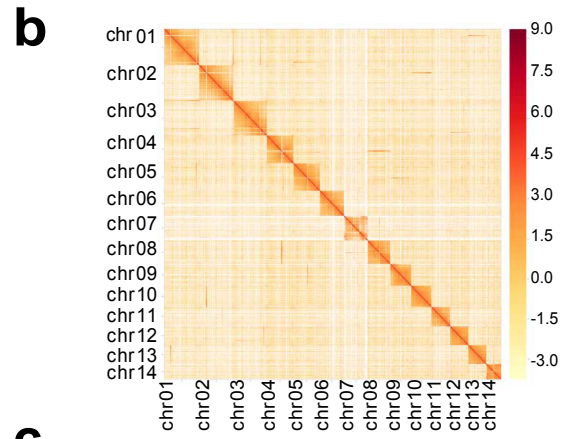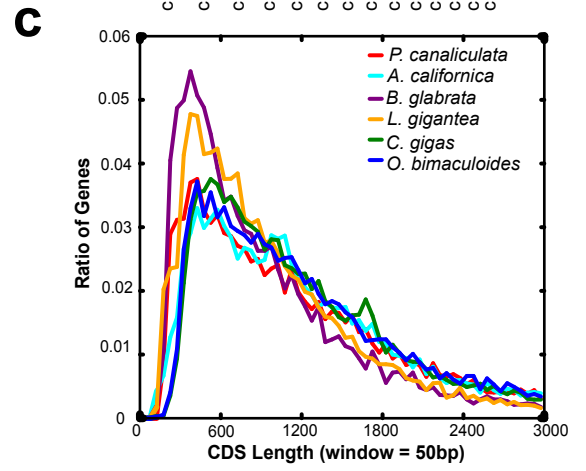



**a**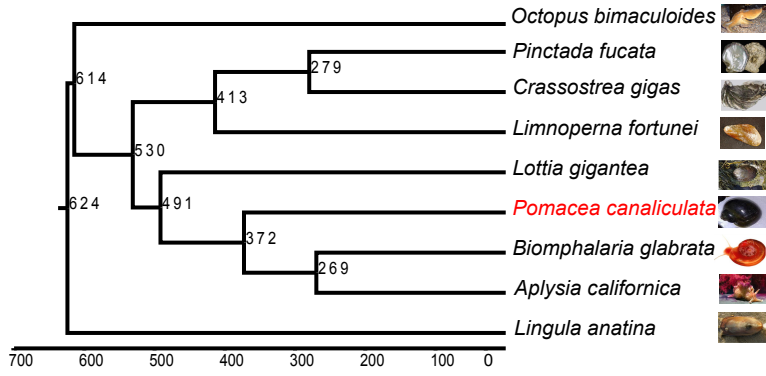**b**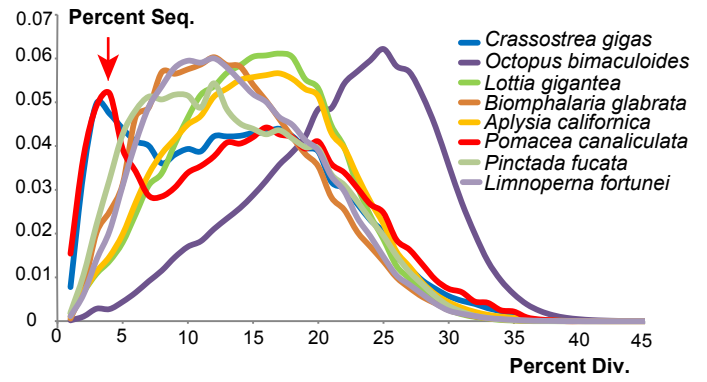

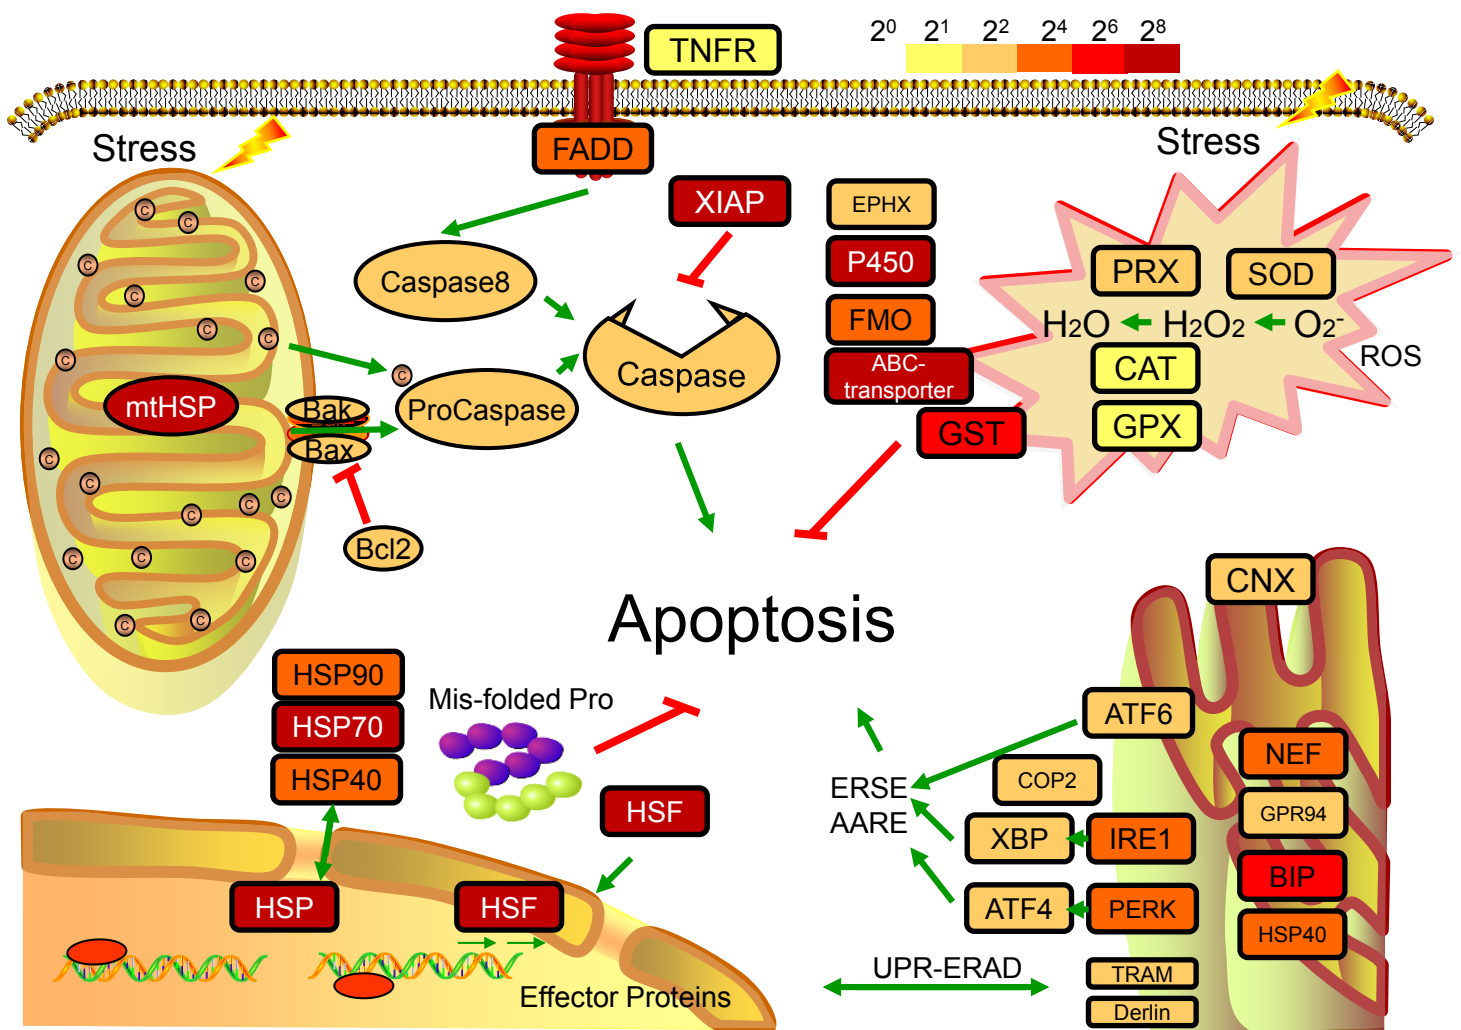

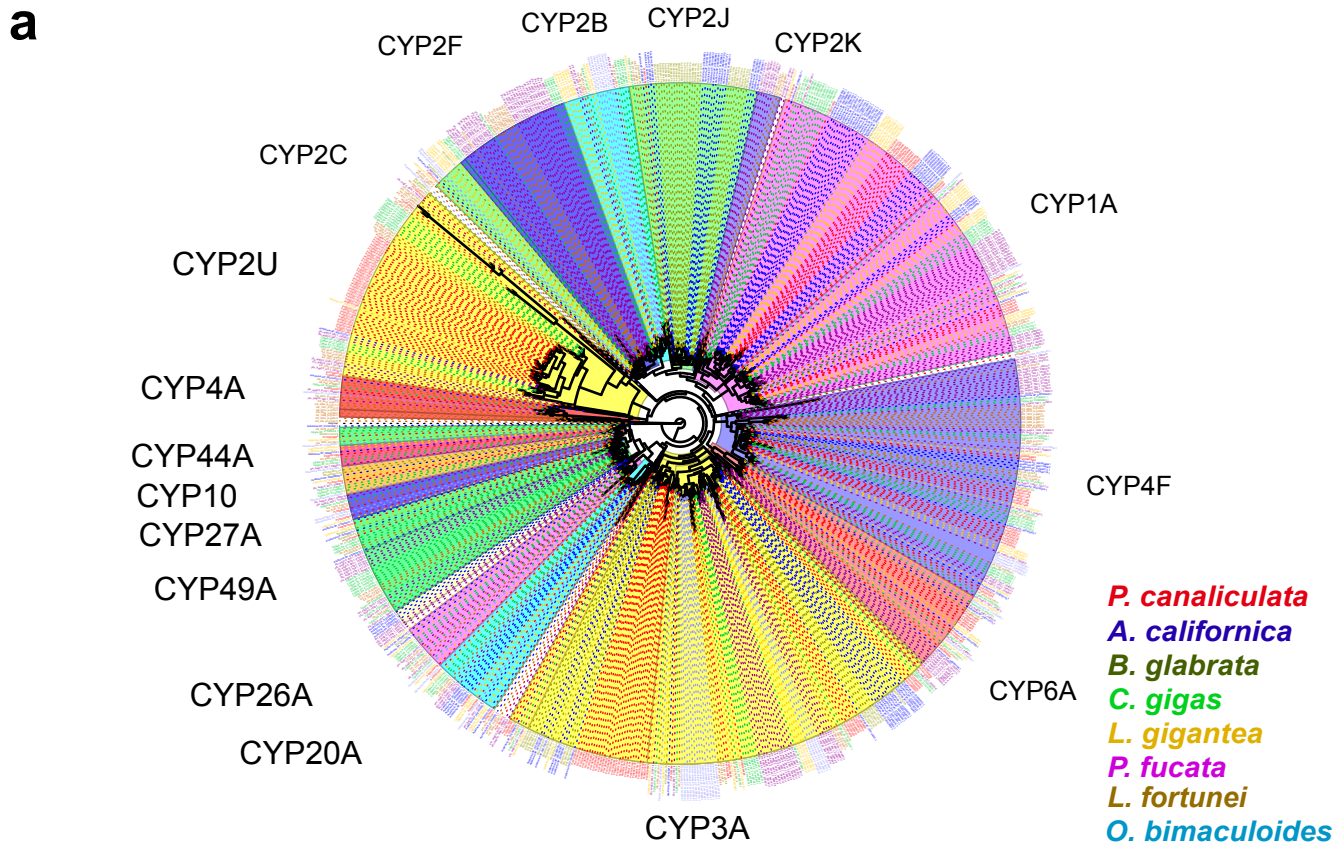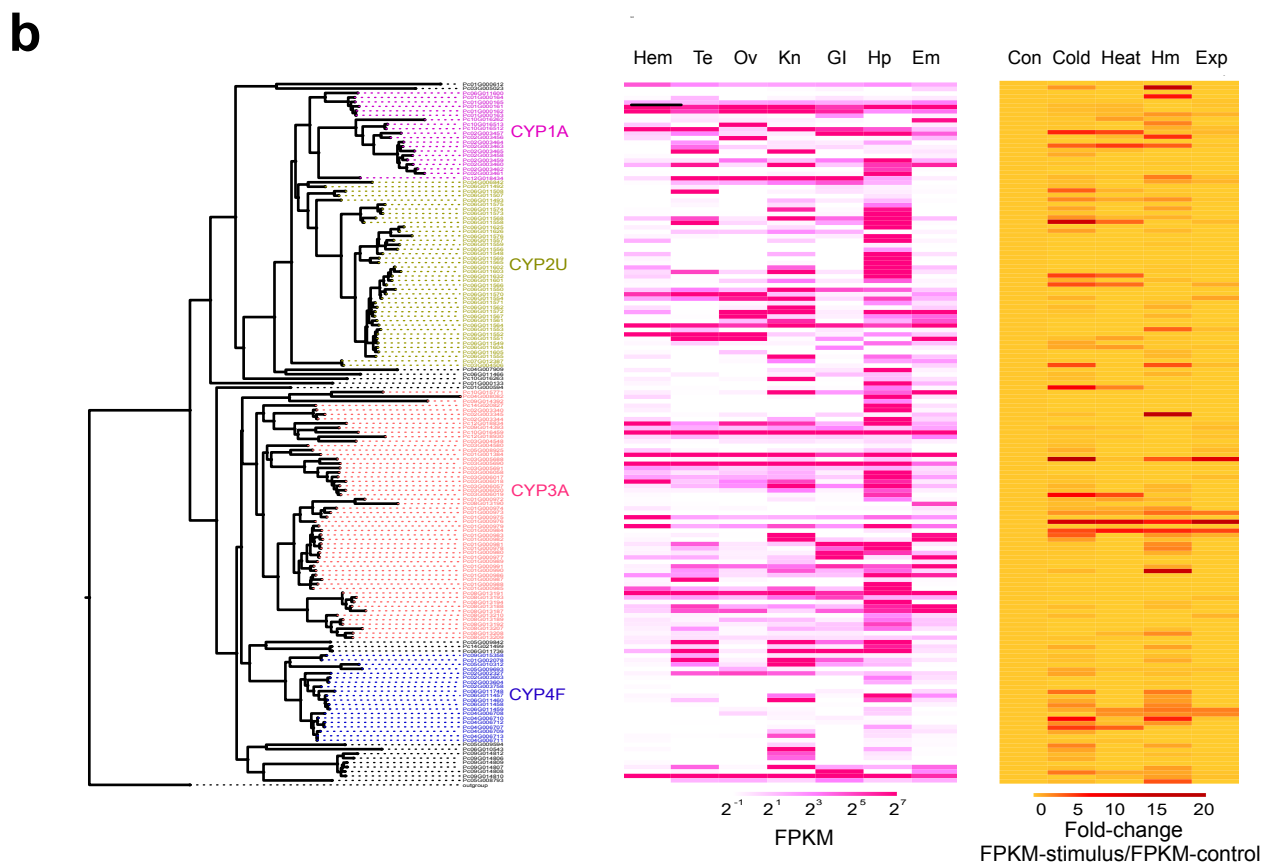

**a***P. canaliculata*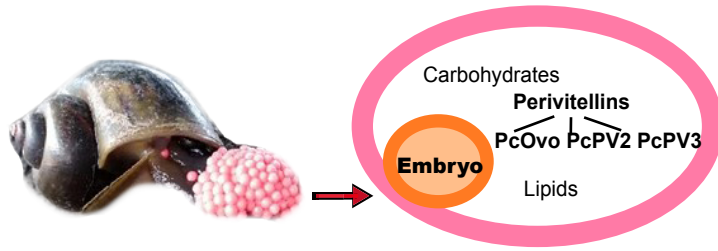**b**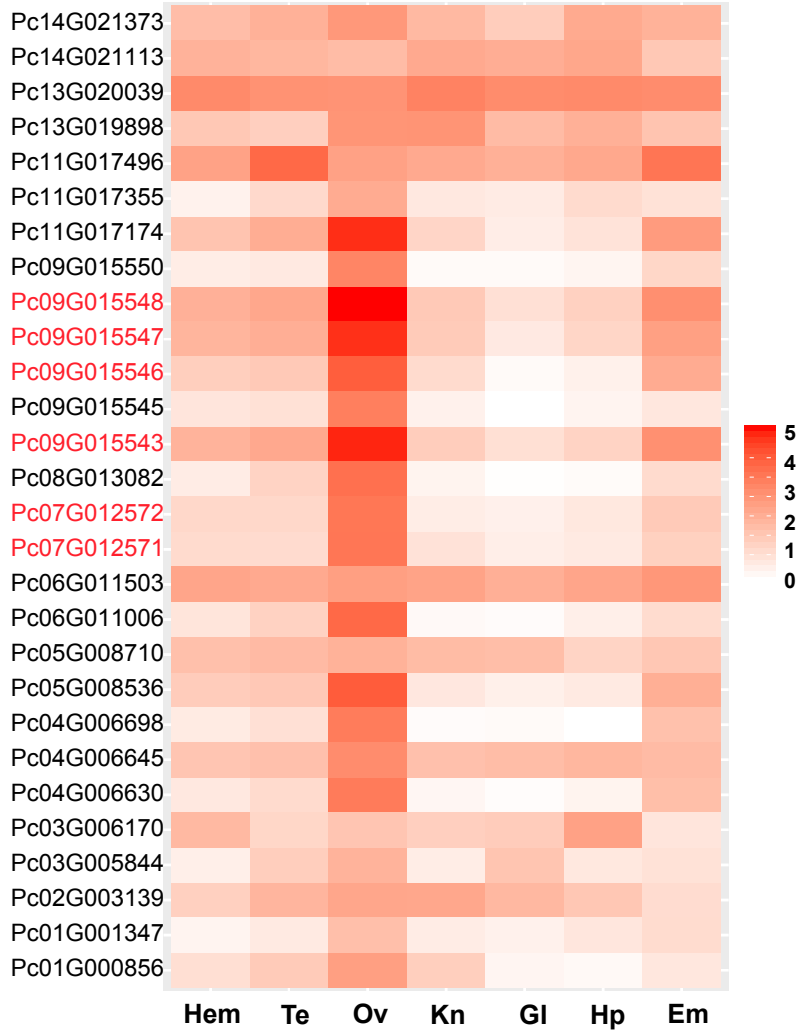

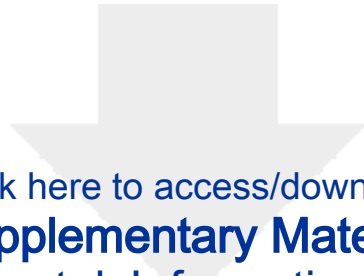

Click here to access/download  
**Supplementary Material**  
Supplemental\_Information-final.doc

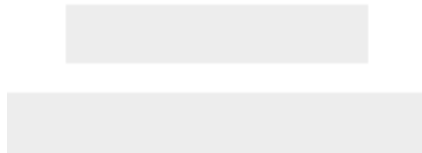

Supplement: giy101_giga-d-18-00030_revision_2.pdf [file giy101_giga-d-18-00030_revision_2.pdf]
