# Supplementary material for: The genome of the golden apple snail Pomacea canaliculata provides insight into stress tolerance and invasive adaptation
Source: PubMed Central journal article supplement (PMC6129957; doi:10.1093/gigascience/giy101), 2018-08-09
Supplement: giy101_giga-d-18-00030_(original_submission).pdf [file giy101_giga-d-18-00030_%28original_submission%29.pdf]

# GigaScience

## The genome of golden apple snail *Pomacea canaliculata* provides insight into stress tolerance and invasive adaptation

--Manuscript Draft--

|                                                      |                                                                                                                                                                                                                                                                                                                                                                                                                                                                                                                                                                                                                                                                                                                                                                                                                                                                                                                                                                                                                                                                                                                                                                                                                                                                                                                                                                                                                                                                                                       |            |
|------------------------------------------------------|-------------------------------------------------------------------------------------------------------------------------------------------------------------------------------------------------------------------------------------------------------------------------------------------------------------------------------------------------------------------------------------------------------------------------------------------------------------------------------------------------------------------------------------------------------------------------------------------------------------------------------------------------------------------------------------------------------------------------------------------------------------------------------------------------------------------------------------------------------------------------------------------------------------------------------------------------------------------------------------------------------------------------------------------------------------------------------------------------------------------------------------------------------------------------------------------------------------------------------------------------------------------------------------------------------------------------------------------------------------------------------------------------------------------------------------------------------------------------------------------------------|------------|
| <b>Manuscript Number:</b>                            | GIGA-D-18-00030                                                                                                                                                                                                                                                                                                                                                                                                                                                                                                                                                                                                                                                                                                                                                                                                                                                                                                                                                                                                                                                                                                                                                                                                                                                                                                                                                                                                                                                                                       |            |
| <b>Full Title:</b>                                   | The genome of golden apple snail <i>Pomacea canaliculata</i> provides insight into stress tolerance and invasive adaptation                                                                                                                                                                                                                                                                                                                                                                                                                                                                                                                                                                                                                                                                                                                                                                                                                                                                                                                                                                                                                                                                                                                                                                                                                                                                                                                                                                           |            |
| <b>Article Type:</b>                                 | Research                                                                                                                                                                                                                                                                                                                                                                                                                                                                                                                                                                                                                                                                                                                                                                                                                                                                                                                                                                                                                                                                                                                                                                                                                                                                                                                                                                                                                                                                                              |            |
| <b>Funding Information:</b>                          | National key research and development program of China (2016YFC1200600)                                                                                                                                                                                                                                                                                                                                                                                                                                                                                                                                                                                                                                                                                                                                                                                                                                                                                                                                                                                                                                                                                                                                                                                                                                                                                                                                                                                                                               | Dr Wei Fan |
|                                                      | Shenzhen science and technology program (JCYJ20150630165133395)                                                                                                                                                                                                                                                                                                                                                                                                                                                                                                                                                                                                                                                                                                                                                                                                                                                                                                                                                                                                                                                                                                                                                                                                                                                                                                                                                                                                                                       | Dr Wei Fan |
|                                                      | Fund of Key Laboratory of Shenzhen (ZDSYS20141118170111640)                                                                                                                                                                                                                                                                                                                                                                                                                                                                                                                                                                                                                                                                                                                                                                                                                                                                                                                                                                                                                                                                                                                                                                                                                                                                                                                                                                                                                                           | Dr Wei Fan |
|                                                      | The Agricultural Science and Technology Innovation Program (ASTIP) of Chinese Academy of Agricultural Sciences(CAAS) & Elite Youth Program of Chinese Academy of Agricultural Sciences                                                                                                                                                                                                                                                                                                                                                                                                                                                                                                                                                                                                                                                                                                                                                                                                                                                                                                                                                                                                                                                                                                                                                                                                                                                                                                                | Dr Wei Fan |
| <b>Abstract:</b>                                     | <p>Background: The golden apple snail (<i>Pomacea canaliculata</i>) is a worldwide fresh water snail listed in the top-100 worst invasive species, and a noted agricultural and quarantine pest causing huge economic loss, characterized with fast growth, strong stress tolerance, high reproduction rate, and adaptation to a broad range of environments.</p> <p>Results: Here, we used long-read sequencing to produce a 440-Mb high-quality chromosome level assembly for <i>P. canaliculata</i> genome. In total, 50 Mb (11.4%) repeat sequences and 21,533 gene models were identified in the genome. Major findings of this study include the recent explosion of DNA/hAT-Charlie TEs, the expansion of P450 gene family and the constitution of cellular homeostasis system, contributing to the ecological plasticity in the stress adaptation. In addition, the perivitellin gene expansion and high transcriptional level in ovary promotes the function of nutrients supplying and defense ability in the eggs. Furthermore, the gut metagenome also encodes rich genes for food digestion and xenobiotics degradation.</p> <p>Conclusions: These findings collectively provide novel insight into the molecular mechanisms of the ecological plasticity and high invasiveness. Our results not only strengthen the understanding of molluscs genomics and biological invasion, but also benefit preventing the invasion of apple snail and transmission of pathogenetic parasites.</p> |            |
| <b>Corresponding Author:</b>                         | Wei Fan<br>Chinese Academy of Agricultural Sciences<br>CHINA                                                                                                                                                                                                                                                                                                                                                                                                                                                                                                                                                                                                                                                                                                                                                                                                                                                                                                                                                                                                                                                                                                                                                                                                                                                                                                                                                                                                                                          |            |
| <b>Corresponding Author Secondary Information:</b>   |                                                                                                                                                                                                                                                                                                                                                                                                                                                                                                                                                                                                                                                                                                                                                                                                                                                                                                                                                                                                                                                                                                                                                                                                                                                                                                                                                                                                                                                                                                       |            |
| <b>Corresponding Author's Institution:</b>           | Chinese Academy of Agricultural Sciences                                                                                                                                                                                                                                                                                                                                                                                                                                                                                                                                                                                                                                                                                                                                                                                                                                                                                                                                                                                                                                                                                                                                                                                                                                                                                                                                                                                                                                                              |            |
| <b>Corresponding Author's Secondary Institution:</b> |                                                                                                                                                                                                                                                                                                                                                                                                                                                                                                                                                                                                                                                                                                                                                                                                                                                                                                                                                                                                                                                                                                                                                                                                                                                                                                                                                                                                                                                                                                       |            |
| <b>First Author:</b>                                 | Conghui Liu                                                                                                                                                                                                                                                                                                                                                                                                                                                                                                                                                                                                                                                                                                                                                                                                                                                                                                                                                                                                                                                                                                                                                                                                                                                                                                                                                                                                                                                                                           |            |
| <b>First Author Secondary Information:</b>           |                                                                                                                                                                                                                                                                                                                                                                                                                                                                                                                                                                                                                                                                                                                                                                                                                                                                                                                                                                                                                                                                                                                                                                                                                                                                                                                                                                                                                                                                                                       |            |
| <b>Order of Authors:</b>                             | Conghui Liu                                                                                                                                                                                                                                                                                                                                                                                                                                                                                                                                                                                                                                                                                                                                                                                                                                                                                                                                                                                                                                                                                                                                                                                                                                                                                                                                                                                                                                                                                           |            |
|                                                      | Bo Liu                                                                                                                                                                                                                                                                                                                                                                                                                                                                                                                                                                                                                                                                                                                                                                                                                                                                                                                                                                                                                                                                                                                                                                                                                                                                                                                                                                                                                                                                                                |            |
|                                                      | Yuwei Ren                                                                                                                                                                                                                                                                                                                                                                                                                                                                                                                                                                                                                                                                                                                                                                                                                                                                                                                                                                                                                                                                                                                                                                                                                                                                                                                                                                                                                                                                                             |            |
|                                                      | Yan Zhang                                                                                                                                                                                                                                                                                                                                                                                                                                                                                                                                                                                                                                                                                                                                                                                                                                                                                                                                                                                                                                                                                                                                                                                                                                                                                                                                                                                                                                                                                             |            |

|                                                                                                                                                                                                                                                                                                                                                                                                                                                                                                                                     |                 |
|-------------------------------------------------------------------------------------------------------------------------------------------------------------------------------------------------------------------------------------------------------------------------------------------------------------------------------------------------------------------------------------------------------------------------------------------------------------------------------------------------------------------------------------|-----------------|
|                                                                                                                                                                                                                                                                                                                                                                                                                                                                                                                                     | Hengchao Wang   |
|                                                                                                                                                                                                                                                                                                                                                                                                                                                                                                                                     | Shuqu Li        |
|                                                                                                                                                                                                                                                                                                                                                                                                                                                                                                                                     | Fan Jiang       |
|                                                                                                                                                                                                                                                                                                                                                                                                                                                                                                                                     | Lijuan Yin      |
|                                                                                                                                                                                                                                                                                                                                                                                                                                                                                                                                     | Guojie Zhang    |
|                                                                                                                                                                                                                                                                                                                                                                                                                                                                                                                                     | Wanqiang Qian   |
|                                                                                                                                                                                                                                                                                                                                                                                                                                                                                                                                     | Wei Fan         |
| <b>Order of Authors Secondary Information:</b>                                                                                                                                                                                                                                                                                                                                                                                                                                                                                      |                 |
| <b>Opposed Reviewers:</b>                                                                                                                                                                                                                                                                                                                                                                                                                                                                                                           |                 |
| <b>Additional Information:</b>                                                                                                                                                                                                                                                                                                                                                                                                                                                                                                      |                 |
| <b>Question</b>                                                                                                                                                                                                                                                                                                                                                                                                                                                                                                                     | <b>Response</b> |
| Are you submitting this manuscript to a special series or article collection?                                                                                                                                                                                                                                                                                                                                                                                                                                                       | No              |
| <p><b>Experimental design and statistics</b></p> <p>Full details of the experimental design and statistical methods used should be given in the Methods section, as detailed in our <a href="#">Minimum Standards Reporting Checklist</a>. Information essential to interpreting the data presented should be made available in the figure legends.</p> <p>Have you included all the information requested in your manuscript?</p>                                                                                                  | Yes             |
| <p><b>Resources</b></p> <p>A description of all resources used, including antibodies, cell lines, animals and software tools, with enough information to allow them to be uniquely identified, should be included in the Methods section. Authors are strongly encouraged to cite <a href="#">Research Resource Identifiers</a> (RRIDs) for antibodies, model organisms and tools, where possible.</p> <p>Have you included the information requested as detailed in our <a href="#">Minimum Standards Reporting Checklist</a>?</p> | Yes             |
| <p><b>Availability of data and materials</b></p> <p>All datasets and code on which the conclusions of the paper rely must be either included in your submission or deposited in <a href="#">publicly available repositories</a></p>                                                                                                                                                                                                                                                                                                 | Yes             |

(where available and ethically appropriate), referencing such data using a unique identifier in the references and in the “Availability of Data and Materials” section of your manuscript.

Have you have met the above requirement as detailed in our [Minimum Standards Reporting Checklist?](#)

1 **The genome of golden apple snail *Pomacea canaliculata* provides insight into**  
2 **stress tolerance and invasive adaptation**

3 Conghui Liu<sup>1\*</sup>, Bo Liu<sup>1\*</sup>, Yuwei Ren<sup>1\*</sup>, Yan Zhang<sup>1\*</sup>, Hengchao Wang<sup>1</sup>, Shuqu Li<sup>1</sup>,  
4 Fan Jiang<sup>1</sup>, Lijuan Yin<sup>1</sup>, Guojie Zhang<sup>2</sup>, Wanqiang Qian<sup>1†</sup> and Wei Fan<sup>1†</sup>

5 <sup>1</sup>Agricultural Genomic Institute, Chinese Academy of Agricultural Sciences,  
6 Shenzhen, Guangdong, 518120, China.

7 <sup>2</sup>BGI-Shenzhen, Shenzhen, Guangdong, 518083, China

8  
9 Conghui Liu: rapherlch@163.com; Bo Liu: lb\_bobo@aliyun.com; Yuwei Ren:  
10 xiaoshudaxia@126.com; Yan Zhang: milrazhang@163.com; Hengchao Wang:  
11 wanghengchao000@qq.com; Shuqu Li: lishuqu1234@163.com; Fan Jiang:  
12 greatjf@163.com; Lijuan Yin: yinlijuan1005@163.com; Guojie Zhang:  
13 guojie.zhang@bio.ku.dk

14 \*These authors contributed equally to this work.

15 †Correspondence should be addressed to Wanqiang Qian (qianwanqiang@caas.cn) or  
16 Wei Fan (fanwei@caas.cn).

17  
18 **Abstract**

19 **Background:** The golden apple snail (*Pomacea canaliculata*) is a worldwide fresh  
20 water snail listed in the top-100 worst invasive species, and a noted agricultural and  
21 quarantine pest causing huge economic loss, characterized with fast growth, strong  
22 stress tolerance, high reproduction rate, and adaptation to a broad range of

1 23 environments.

2  
3 24 **Results:** Here, we used long-read sequencing to produce a 440-Mb high-quality  
4  
5  
6 25 chromosome level assembly for *P. canaliculata* genome. In total, 50 Mb (11.4%)  
7  
8  
9 26 repeat sequences and 21,533 gene models were identified in the genome. Major  
10  
11  
12 27 findings of this study include the recent explosion of DNA/hAT-Charlie TEs, the  
13  
14  
15 28 expansion of P450 gene family and the constitution of cellular homeostasis system,  
16  
17  
18 29 contributing to the ecological plasticity in the stress adaptation. In addition, the  
19  
20  
21 30 perivitellin gene expansion and high transcriptional level in ovary promote the  
22  
23  
24 31 function of nutrients supplying and defense ability in the eggs. Furthermore, the gut  
25  
26  
27 32 metagenome also encodes rich genes for food digestion and xenobiotics degradation.

28  
29 33 **Conclusions:** These findings collectively provide novel insight into the molecular  
30  
31  
32 34 mechanisms of the ecological plasticity and high invasiveness. Our results not only  
33  
34  
35 35 strengthen the understanding of molluscs genomics and biological invasion, but also  
36  
37  
38 36 benefit preventing the invasion of apple snail and transmission of pathogenetic  
39  
40  
41 37 parasites.

42  
43 38 **Keywords:** golden apple snail, *Pomacea canaliculata*, genome, adaptive evolution,  
44  
45 39 stress tolerance, P450, reproduction, perivitelline, metagenome

## 40 **Background**

41  
42  
43 41 The golden apple snail *Pomacea canaliculata* (family Ampullariidae; Order  
44  
45  
46 42 Architaenioglossa) is a fresh water snail listed in the 100 of the world's worst invasive  
47  
48  
49 43 species [1], and considered as a noted agricultural and quarantine pest worldwide [2].

1 44 Native to the tropical and subtropical South American, the *P. canaliculata* gradually  
2  
3 45 spread to the non-indigenous region, such as Southeast and East Asia [3], Africa [4],  
4  
5  
6 46 North America [5], Oceania [6] and even Europe [7], and the successful  
7  
8  
9 47 biological invasion was due to polyphagous feeding habits [8], voracious appetite [9],  
10  
11  
12 48 broad environmental adaptability [10] and rapid growth and high rate of reproduction  
13  
14  
15 49 [11]. Besides the ecological impact, the *P. canaliculata* ravaged a wide range of crops  
16  
17  
18 50 including grain, fruit and vegetable [12], causing severe economic loss each year as a  
19  
20  
21 51 result of yield loss, replanting cost and the funds of control  
22  
23 52 (<https://www.cabi.org/isc/datasheet/68490>). More seriously, *P. canaliculata* has  
24  
25  
26 53 involved in the transmission of a human fatal disease, Eosinophilic meningitis, that  
27  
28  
29 54 firstly appeared in East Asia where people take them as food frequently [13]. During  
30  
31  
32 55 this pathophoresis, *P. canaliculata* acts as an important intermediate host of  
33  
34  
35 56 pathogenic parasite *Angiostrongylus cantonensis*, and the range of infectious regions  
36  
37  
38 57 is still expanding, causing great challenge to human health [14, 15].

39 58 Molluscs is a highly diverse group and second only to arthropods in species  
40  
41  
42 59 number [16], and the high biodiversity makes molluscs an excellent model to address  
43  
44  
45 60 the issues such as biogeography, adaptability and evolution process [17], and the  
46  
47  
48 61 worldwide invasive *P. canaliculata* provides valuable potential in these fields [18]. As  
49  
50  
51 62 a primitive circumtropical species, *P. canaliculata* possesses strong ecology plasticity  
52  
53  
54 63 to hold advantage on plenty of aspects, including low temperature resistance [19],  
55  
56  
57 64 drought tolerance [20], which contributes to succeed in resource acquisition over the  
58  
59  
60 65 competitive species. Additionally, *P. canaliculata* is tolerant with heavy metal

1 66 contamination. When living in contaminated water, its gill is enriched of high  
2  
3 67 concentration of heavy metal and histopathological changes in digestive tract is  
4  
5  
6 68 detected, however, with extremely low mortality rate [21]. For protection of embryos,  
7  
8  
9 69 the conspicuous coloration and neurotoxic lectin could confer the eggs a survival  
10  
11  
12 70 advantage and defense against the potential predator [22]. Moreover, the  
13  
14 71 immune-neuroendocrine system can also be detected in *P. canalicula*, demonstrates  
15  
16  
17 72 by the existence of a specific immune memory after the bacterial challenge [23, 24],  
18  
19  
20 73 broadening the studies of invertebrate immunology.

21  
22 74 During the past years, the genomic features of *P. canalicula* have been increasingly  
23  
24  
25 75 studied. After the discovery of 14 pachytene bivalents in the karyotype [25],  
26  
27  
28 76 molecular markers were identified to investigate the genetic diversity of *P.*  
29  
30  
31 77 *canaliculata* population, including 369 amplified fragment length polymorphism  
32  
33  
34 78 (AFLP) locis [26], 16,717 simple sequence repeats (SSR) [27, 28] and 15,412  
35  
36  
37 79 single-nucleotide polymorphisms SNPs [29]. In addition, multiple transcriptome  
38  
39  
40 80 analyses have been performed to investigate the adaptation, invasion and immune  
41  
42  
43 81 mechanisms. For instance, Sun et al. reported 128,436 unigenes based on a de novo  
44  
45  
46 82 assembly of Illumina reads [29], transcriptome changes in response to heat stress and  
47  
48  
49 83 starving incubation was used to characterize invasive and adaptive abilities [30, 31], a  
50  
51  
52 84 transcriptome analysis between invasive *P. canaliculata* and indigenous  
53  
54  
55 85 *Cipangopaludina cahayensis* provides insights into biological invasion [28], and 402  
56  
57  
58 86 immune-related differentially expressed genes (DEGs) by Lipopolysaccharide (LPyS)  
59  
60  
61 87 challenge were used to explore the mechanisms against pathogens [32]. Furthermore,  
62  
63  
64  
65

1 88 proteomics tools such as Isobaric Tags For Relative, Absolute Quantitation (iTRAQ),  
2  
3 89 and Liquid Chromatography-tandem Mass Spectrometry (LC-MS/MS) were also  
4  
5  
6 90 applied in the study of protein expression for the estivation and oviposition [33, 34],  
7  
8  
9 91 together providing plentiful omics-data for the functional analysis of *P. canalicula*.  
10  
11 92 However, researches at whole genome level in *P. canaliculata* still lags far behind  
12  
13  
14 93 other molluscs species, due to the lack of a high-quality reference genome. By far,  
15  
16  
17 94 multiple draft genomes of molluscs have been published, such as California sea hare  
18  
19  
20 95 [35], Pacific oyster [36], Pearl oyster [37], owl limpet [38], California two-spot  
21  
22  
23 96 octopus [39], deep-sea mussel [40], *Biomphalaria* snails [41], greatly promoting the  
24  
25  
26 97 research of molluscs genomics. In this study, we present a chromosome-level genome  
27  
28  
29 98 assembly of *P. canalicula* with high-quality gene annotation, transcriptome data from  
30  
31  
32 99 several tissues and under various conditions, as well as the metagenomic data from  
33  
34 100 the intestinal tracts, all of which were then applied to study the species-specific  
35  
36  
37 101 invasive characters, such as cellular homeostasis system underlying strong stress, and  
38  
39  
40 102 color and nutrient of the eggs. Our data will not only strengthen the understanding of  
41  
42  
43 103 evolutionary mechanisms of molluscs and molecular basis of biological invasion, but  
44  
45  
46 104 also foster developments to control the invasion of *P. canalicula* and interrupt the  
47  
48  
49 105 transmission of pathogenetic nematode parasites.  
50  
51

## 52 106 **RESULTS**

### 56 107 **Complete genome assembly at chromosome level**

60 108 We generated 26.6 Gb (60.1 X) PacBio SMRT raw reads with average read length



109 10.1 Kb, and 291 Gb (652.4 X) Illumina HiSeq paired-end reads with read length  
110 150-250 bp, using DNA extracted from one single adult *P. canaliculate* (Table S1).  
111 The 24.4 Gb (55.4 X) clean PacBio SMRT reads that passed quality filtering were  
112 assembled by smartdenovo (<https://github.com/ruanjue/smartdenovo>), giving rise to  
113 an assembly of 1234 raw contigs with total length 473.6 Mb and N50 length 1.0 Mb.  
114 After filtering of alternatively heterozygous contigs, 745 resulting contigs with total  
115 length 440.1 Mb and N50 length 1.1 Mb were taken as the final contigs. Previous  
116 karyotype research shown that haploid *P. canaliculate* genome consist of 14  
117 chromosomes [25]. Based on Hi-C data, 439.5 Mb (99.9%) final contigs were  
118 anchored and oriented into 14 large scaffolds, each corresponding to a natural  
119 chromosome (Figure 1a and Figure 1b), with the longest 45.4 Mb and shortest 27.2  
120 Mb. This assembly quality is much better than the other published mollucan genomes  
121 so far (Table 1). Besides the length and continuity of assembled sequences, another  
122 important aspect for evaluating genome assembly is the ratio of genome coverage.  
123 With an estimated genome size of 446 Mb based on distribution of k-mer frequency  
124 [42] (Figure S1), ~98.6 % of the genome has been assembled in *P. canaliculata*. To  
125 further confirm the accuracy and completeness of the assembly, we mapped the  
126 Illumina shotgun reads to the assembled reference genome. Significantly, 97% and 95%  
127 of the genome-derived and transcriptome-derived reads could be aligned to the  
128 reference genome, respectively, suggesting no obvious bias for sequencing and  
129 assembly. Additionally, the mitochondrial genome of *P. canaliculata* was also  
130 assembled as a single contig with 15,707 bp in length, which has 99.9 % sequence

1 131 identity to the published mitochondrial genome (GenBank: KJ739609.1) (Figure S2).  
2  
3 132 The high-quality reference genome provides a good foundation for gene annotation.  
4  
5  
6 133 The protein-coding genes were predicted on the reference genome by EVM,  
7  
8  
9 134 integrating evidences from *de novo* prediction, transcriptome and homology data. In  
10  
11  
12 135 total, 21,533 gene models were predicted as the reference gene set, with coding  
13  
14  
15 136 regions spanning ~32.2 Mb (7.3 %) of the genome (Table 1 and Table S2). The  
16  
17  
18 137 distribution of CDS length in *P. canaliculata* is similar to the closely related species  
19  
20  
21 138 (Figure 1c). Overall, 97.5 % of the reference genes were supported by transcriptome  
22  
23  
24 139 data, and 98.0 % of eukaryote core genes from OrthoDB (<http://www.orthodb.org/>)  
25  
26  
27 140 were identified in the reference gene set by BUSCO, comparable to the other  
28  
29  
30 141 published mollucan genomes (Table 1). For the functional annotation, a total of  
31  
32  
33 142 19,815 (91.9 %) reference genes were annotated by at least one functional database.  
34  
35  
36 143 Specifically, 15,662 (72.7 %), 13,769 (63.4 %), 17,081 (79.3 %), 18,847 (87.5 %) and  
37  
38  
39 144 17,003 (79.9 %) reference genes were annotated with eggNOG, KEGG, NR, Interpro  
40  
41  
42 145 and Uniprot database, respectively (Figure S3).

#### 43 146 **Signs of Adaptive Evolution in *P. canaliculata* Genome**

44  
45  
46  
47 147 To gain insight into evolutionary perspective of *P. canaliculata*, the phylogenetic tree  
48  
49  
50 148 was built based on 471 high-confidence single-copy ortholog genes from seven  
51  
52  
53 149 related species (*P. canaliculata*, *L. gigantea*, *A. californica*, *B. glabrata*, *C. gigas*, *O.*  
54  
55  
56 150 *bimaculoides* and *L. anatina*) by Phyml [43] and the divergence time was estimated  
57  
58  
59 151 using mcmctree [44]. The result shows that *P. canaliculata* diverged from the ancestor  
60  
61  
62  
63  
64  
65

1 152 of *B. glabrata* and *A. California* 290 million years ago (Mya), and from *L. gigantea*  
2  
3  
4 153 415 Mya (Figure 2a).  
5  
6 154 Then, the molluscan ortholog genes were investigated for adaptive evolution.  
7  
8  
9 155 Utilizing pairwise protein sequence similarities, the gene family clustering was  
10  
11 156 conducted by orthfinder [45]. A total of 152,878 reference genes from the seven  
12  
13 157 species were clustered into 68,942 ortholog groups, amongst which 13,805 ortholog  
14  
15 158 groups with at least two genes each. In *P. canaliculata*, we identified 9,626 ortholog  
16  
17 159 groups, amongst which 117 and 5,462 ortholog groups undergone species-specific  
18  
19 160 expansion, thus may play important roles in adaption to the environment as an  
20  
21 161 invasive species. The functions of these orthologous groups are mainly related to  
22  
23 162 glycan biosynthesis, digestive, endocrine, signal transduction, immune, or  
24  
25 163 carbohydrate metabolism and so on (Figure S4).  
26  
27  
28 164 The high-coverage genome assembly enables a comprehensive analysis of the  
29  
30 165 transposable elements (TEs), which plays multiple roles in driving genome evolution  
31  
32 166 in eukaryotes [46]. In total, we identified 49.6 Mb TE sequences in the assembled *P.*  
33  
34 167 *canaliculata* genome (Table 1), including 3.4 Mb long terminal repeats (LTR), 27.2  
35  
36 168 Mb long interspersed elements (LINE), 17.5 Mb DNA transposons and 1.5 Mb short  
37  
38 169 interspersed elements (SINE). Next, we analyzed the divergence rate of TEs for each  
39  
40 170 class of TEs among the available sequenced mollusk genomes, interestingly, only the  
41  
42 171 results of DNA transposons showed a unique peak at ~4% divergence rate for *P.*  
43  
44 172 *canaliculata* and *C. gigas* (Figure 2b), indicating a recent explosion of DNA  
45  
46 173 transposons in these two species. More than half of the DNA transposons belong to  
47  
48  
49  
50  
51  
52  
53  
54  
55  
56  
57  
58  
59  
60  
61  
62  
63  
64  
65

1 174 the DNA/hAT-Charlie TE family, which is ~22.7% of total DNA/hAT-Charlie TEs in  
2  
3 175 the genome. TEs are powerful facilitators of evolution by generating “evolutionary  
4  
5  
6 176 potential” to introduce small adaptive changes within a lineage, and the importance of  
7  
8  
9 177 TEs to stress responses and adaptation has been reported in numerous researches [47,  
10  
11 178 48]. The recent explosion of DNA/hAT-Charlie TEs in *P. canaliculata* could also play  
12  
13  
14 179 important roles to promote the potential plasticity in the stress adaptation.  
15  
16

### 180 **Investigation of Cellular homeostasis system underlying strong stress adaptation**

181 Homeostasis system plays a crucial role in the stress adaptability, providing the  
182 molecular basis in re-establishing the dynamic equilibrium after the challenge of  
183 various environmental stressors, including temperature, air exposure, anthropogenic  
184 pollution and pathogens [49]. In the present study, we addressed three constituent  
185 parts of the cellular homeostasis system, which contributes to the successful  
186 ecological plasticity of *P. canaliculata* (Figure 3). Transcriptome data of the  
187 hemocytes after stimulus (cold, heat, heavy and air exposure) was also sequenced and  
188 analyzed to address the potential roles of the genes in Cellular homeostasis system.

189 Unfolded protein response (UPR) system makes the central part of protein  
190 homeostasis [50]. Heat shock proteins (HSPs) acts as molecular chaperones to  
191 maintain the correct folding, and heat shock transcription factor 1 (HSF1) are  
192 responsible for the transcriptional induction of HSPs [51]. In *P. canaliculata* genome,  
193 13 HSP70s, 6 HSP90s, 7 HSP40s and 11 HSFs were identified (Table S3), and the  
194 expression of HSP90s and HSFs were highly induced in response to the stress of heat,

1 195 cold, heavy metal and air exposure (Table S4). Inositol-requiring protein 1 (IRE1),  
2  
3  
4 196 protein kinase RNA-like ER kinase (PERK), and activating transcription factor 6  
5  
6 197 (ATF6) are three mediators recruited by endoplasmic reticulum (ER) to regulated the  
7  
8  
9 198 UPR [52]. We found putative coding genes of the three core mediators, their  
10  
11  
12 199 respective downstream transcription factors, and the corresponding recognition  
13  
14  
15 200 chaperons in *P. canaliculata* genome (Table S3).  
16  
17 201 Xenobiotic biotransformation system helps the mollusc adapt to toxicants, especially  
18  
19  
20 202 the pesticide in aquatic environments [53]. Manual annotation on this genome  
21  
22  
23 203 identified 157 cytochrome P450s (CYP450s), 15 flavin-containing monooxygenases  
24  
25  
26 204 (FMOs), 53 glutathione S-transferases (GSTs) and 105 ATP binding cassette (ABC)  
27  
28  
29 205 transporters, most of which showed an up-regulation in expression under stress (Table  
30  
31  
32 206 S3, Table S4). These proteins are evidenced to function in contaminant detecting,  
33  
34  
35 207 conjugative modification and expulsion for xenobiotic detoxification [54-56].  
36  
37 208 Massive production of reactive oxygen species (ROS) and reactive oxygen  
38  
39  
40 209 intermediates (ROI) induced by stress lead to many pathological conditions, and  
41  
42  
43 210 antioxidant system protect the organism from superoxide [57]. Four main antioxidant  
44  
45  
46 211 enzyme classes, namely superoxide dismutase (SOD), catalase (CAT), peroxidase  
47  
48  
49 212 (Prx), and glutathione peroxidase (GPX), were found in the *P. canaliculata* with an  
50  
51  
52 213 elevating global expression in response to stress (Table S3, Table S4).  
53  
54  
55 214 Apoptosis is a process of cell death when sensing stress and the regulation of  
56  
57  
58 215 apoptosis maintains the dynamic homeostasis of internal environment. In *P.*  
59  
60  
61 216 *canaliculata*, we propose the existence of both intrinsic and extrinsic apoptotic

1 217 signaling pathways, evidenced by the presence of homologous genes involve in both  
2  
3 218 pathways. It seems these two pathways could be activated by cytochrome C and  
4  
5  
6 219 tumor necrosis factor receptor (TNFR), respectively (Table S3). The inhibitors of  
7  
8  
9 220 apoptosis, such as XIAP, Bcl2 and Bak, are also detected with an increased expression  
10  
11 221 in response to the stress (Table S4), which are expected to delay the apoptosis process  
12  
13  
14 222 and the cell death in stress response.  
15  
16

### 17 18 223 **The expansion of P450 gene family contribute to stress tolerance** 19 20

21  
22 224 Cytochromes P450 (CYP) enzymes are a monooxygenase family with highly diverse  
23  
24 225 structures and functions, broadly identified in all kingdoms of life [58]. P450s  
25  
26  
27 226 catalyze the reductive scission of molecular oxygen, and are responsible for the  
28  
29  
30 227 synthesis and metabolism of various molecules, including drugs, hormones,  
31  
32  
33 228 antibiotics, pesticides, carcinogens and toxins [59]. The synthesized hormones, such  
34  
35  
36 229 as glucocorticoids, mineralocorticoids, progestins, and sex hormones, are critical to  
37  
38  
39 230 stress response, growth and reproduction, and the endogenous and exogenous  
40  
41 231 chemical metabolism helps the host combat with the toxic compounds [60].  
42

43  
44 232 We found the *P. canaliculata* CYP gene family had greater level of expansion  
45  
46 233 compared to the other molluscs. We identified 157 genes in the genome of *P.*  
47  
48  
49 234 *canaliculata*, and 128, 102, 135, 78, 52 and 94 genes from *A. California*, *B. glabrata*,  
50  
51  
52 235 *C. gigas*, *L. gigantean*, *O. bimaculoides* and *P. fucata* respectively under the same  
53  
54  
55 236 standard (Figure 4a). The expansive trend was also observed, compared with the  
56  
57  
58 237 model species, such as *Homo sapiens* (57), *Mus musculus* (102), *Dario rerio* (94) and  
59  
60

1 238 *Drosophila melanogaster* (94) [61]. The gene expansion was mainly found in CYP2U  
2  
3  
4 239 and CYP3A sub-families, and fewer genes expanded in CYP4F. In mammals, CYP2U  
5  
6 240 plays a role in the metabolism of fatty acid to generate bioactive eicosanoid  
7  
8  
9 241 derivatives, potentially regulating the development of immune function [62]. In *P.*  
10  
11 242 *canaliculata*, 40 genes forged into the CYP2U clade, mainly expressing in  
12  
13 243 hepatopancreas (Figure 4b and Table S5\_a, Table S5\_b). CYP3A acts as a versatile  
14  
15 244 enzyme metabolizing a wide range of xenobiotics, and the productions promote the  
16  
17 245 growth of various cell types [63]. The 56 CYP3A genes have comprehensive  
18  
19 246 expression in hepatopancreas, gill and kidney (Figure 4b and Table S5\_a, Table S5\_b).  
20  
21 247 CYP4F possesses epoxygenase activity, metabolizing fatty acid to epoxides to  
22  
23 248 suppress hypertension, pain perception and inflammation [64]. 20 genes were  
24  
25 249 identified in CYP4F, and several CYP4F genes present highly induced expression  
26  
27 250 levels under the stress of cold, heat, heavy metal and air exposure, indicating their  
28  
29 251 critical roles in the stress tolerance (Figure 4b and Table S5\_a, Table S5\_b).  
30  
31  
32  
33  
34  
35  
36  
37  
38  
39

40 252 **The perivitellin gene expansion and high transcriptional level in ovary enhance**  
41  
42 253 **reproduction**  
43  
44  
45

46 254 To adapt to the fast invasion life, besides the strong ability to stress tolerance, the *P.*  
47  
48 255 *canaliculata* possesses a high reproductive rate, and one important contributor is their  
49  
50 256 distinct eggs characterized with abundant nutrients, reddish or pinkish color, aerial  
51  
52 257 oviposition and neurotoxic [22, 34]. In most gastropod eggs, Pervitelline Fluid (PVF)  
53  
54 258 with large amounts of nutrients filled in space between the eggshell and the embryo,  
55  
56 259 is composed of carbohydrates, lipids and proteins termed perivitellins, which is not  
57  
58  
59  
60  
61  
62  
63  
64  
65

1 260 only responsible for the major supply of material and energy during embryogenesis,  
2  
3  
4 261 but also provide warning pigment and deadly toxicant against the predators [65].  
5  
6 262 Perivitellins of *P. canaliculata* (Pc) have been verified by proteomics approach and  
7  
8  
9 263 was further divided into three categories called Pc Ovorubin (PcOvo), PcPV2, PcPV3,  
10  
11  
12 264 which are all high-density lipoprotein (HDL) [66] (Figure 5a). We totally identified 18  
13  
14  
15 265 perivitellin genes from the *P. canaliculata* genome, compared to 2 and 1 perivitellin  
16  
17  
18 266 genes from *A. californica* and *P. fucata* respectively, by aligning the seven reference  
19  
20  
21 267 perivitellin gene sequences (NCBI accession AFQ23940.1, AFQ23939.1,  
22  
23 268 AFQ23938.1, AFQ23945.1, AFQ23937.1, P0C8G7.2, P0C8G6.2) to each genome  
24  
25  
26 269 sequences with the same method (blastn e-value  $10^{-20}$ ). It is apparent that the copy  
27  
28  
29 270 number of perivitellin genes was expanded in *P. canaliculata*, and our orthologous  
30  
31  
32 271 and paralogous gene family data by orthoFinder confirmed this. Among the 20  
33  
34  
35 272 perivitellin genes in *P. canaliculate*, there are 2 PcOvo, 13 PcPV2, and 3 unclassified  
36  
37  
38 273 PVFs (Figure 5b and Table S6). The PcOvo carotenoprotein is responsible for the red  
39  
40  
41 274 coloration of the eggs and antioxidant to protect against sun radiation and desiccation  
42  
43  
44 275 [67, 68], while PcPV2 is reported to be neurotoxin implying lethal effect on rodents  
45  
46  
47 276 [22]. The expansion of these genes may enhance the underlying functions of nutrition  
48  
49  
50 277 and protection, offering the eggs an advantage of survival and improve the  
51  
52  
53 278 reproduction rate.  
54  
55  
56 279 The expression of 18 *P. canaliculata* perivitelline genes were detected in 7 tissues,  
57  
58  
59 280 including embryo, testis, ovary, kidney, gill, hepatopancreas and hemocyte. The  
60  
61  
62 281 highest expression of each gene concentrated in embryo and two sexual gland testis  
63  
64  
65



1 282 and ovary, especially in the ovary (Figure 5b and Table S7), suggesting that their  
2  
3 283 decoding proteins might be of importance in germ cell production and embryo  
4  
5  
6 284 development. Taken together, *P. canaliculata* distinguish its embryo development  
7  
8  
9 285 from other seven species on the preponderance of perivitellin gene number and high  
10  
11  
12 286 expression level, that further promotes corresponding function of nutrients supplying  
13  
14  
15 287 and defense ability and eventually contribute to reproduction.  
16  
17

### 18 288 **Gut microbiome plays important roles in stress resistance and food digestion**

19  
20  
21

22 289 The gut microbiome is well known as the second genome of animals, which plays key  
23  
24 290 roles in food digestion, immune defense, etc that are essential to the animals. To  
25  
26  
27 291 investigate whether the gut microbiome has influence on the invasive life style, we  
28  
29  
30 292 collected gut digesta samples from 70 adults of *P. canaliculata*, and generated 31 Gb  
31  
32  
33 293 high quality metagenomic data on Illumina HiseqX10 platform. To our knowledge,  
34  
35  
36 294 this is the first high-depth sequencing of snail gut microbiome. A total of 1,142,095  
37  
38  
39 295 non-redundant genes were obtained, with an average open reading frame (ORF)  
40  
41  
42 296 length of 604 bp (Table S8). The taxonomic composition analysis showed that, at the  
43  
44 297 phylum level, Proteobacteria was the predominant, followed by Verrucomicrobia,  
45  
46  
47 298 Bacteroidetes, Firmicutes, Spirochaetes, Actinobacteria, etc. (Table S9\_a). At the  
48  
49  
50 299 genus level, the most abundant genera include *Aeromonas*, *Enterobacter*,  
51  
52 300 *Desulfovibrio*, *Citrobacter*, *Comamonas*, *Klebsiella* and *Pseudomonas*. (Table S9\_b),  
53  
54  
55 301 most of which were also presented in the snails of *Achatina fulica* [69, 70].  
56

57 302 It is interesting that some of the most abundant genera such as *Desulfovibrio*,  
58  
59  
60  
61  
62  
63  
64  
65

1 303 *Citrobacter* and *Pseudomonas* were reported to have strong abilities of removing  
2  
3 304 heavy metals, by mechanisms of bioprecipitation and bioabsorption [71-73]. For  
4  
5  
6 305 example, the sulfur-reducing bacteria *Desulfovibrio* produced H<sub>2</sub>S that precipitate  
7  
8  
9 306 metals, and therefore reduced the toxic effects of dissolving metals [71]. Based on the  
10  
11 307 KEGG pathway database, the complete sulfate reduction metabolism pathway was  
12  
13 308 identified in the *P. canaliculata* gut microbiome. We suggested that the gut microbes  
14  
15  
16  
17 309 might help *P. canaliculata* to confront with the environmental stress of heavy metals  
18  
19  
20 310 in harsh conditions. In addition, a large number of genes in pathways of xenobiotics  
21  
22 311 biodegradation and metabolism were annotated, corresponding to 288 KEGG  
23  
24  
25 312 orthologous groups (KOs) and 21 pathways (Table S10). As many of the pathways  
26  
27  
28 313 such as benzoate degradation, toluene degradation, xylene degradation and steroid  
29  
30  
31 314 degradation could not be identified in the host genome through KO analysis, we  
32  
33 315 suggested that the microbial detoxification abilities may contribute the *P. canaliculata*  
34  
35  
36 316 to resist stresses caused by xenobiotics such as pesticides and environmental  
37  
38  
39 317 pollutants.

40  
41  
42 318 In view of dietary digestion, the gut microbes were directly involved in breakdown of  
43  
44 319 the cellulose portion, and previous studies have isolated some cellulolytic bacteria and  
45  
46  
47 320 evaluated the cellulolytic enzyme activities [74]. In our work, a broader range of  
48  
49  
50 321 carbohydrate active enzymes (CAZymes) were found. Of the 208 annotated CAZyme  
51  
52 322 families, 99 were Glycoside Hydrolase (GH) families (Table S11). Enzymes that  
53  
54  
55 323 could be classified as cellulases, endohemicelluloses, debranching enzymes,  
56  
57  
58 324 oligosaccharide-degrading enzymes were all presented. These findings indicate that  
59  
60

1 325 the gut microbiome give assistance to digest a broad range of food sources, making *P.*  
2  
3 326 *canaliculata* grow fast to adapt to an invasive life style.  
4  
5  
6  
7

## 8 327 **Conclusion and discussion**

9

10  
11  
12 328 Given its environmental invasiveness, broad stress adaptability and rapid reproduction,  
13  
14  
15 329 the golden apple snail *P. canaliculata* has received a vast of attention worldwide.  
16  
17  
18 330 However, the underlying genetic mechanism has not been comprehensively  
19  
20  
21 331 uncovered. The chromosome level genome of *P. canaliculata* presented in this study  
22  
23 332 sheds first lights into the genomic basis of the ecological plasticity to various stressors.  
24  
25  
26 333 Major findings of this study include the recent explosion of DNA/hAT-Charlie TEs,  
27  
28  
29 334 the expansion of P450 gene family and the constitution of Cellular homeostasis  
30  
31  
32 335 system, contributing to the plasticity in the stress adaptation. Although the defined  
33  
34  
35 336 function of the recently originated TEs could not be confirmed, the explosion of TEs  
36  
37  
38 337 is deemed as powerful facilitators in adaptive evolution, indicating its important role  
39  
40  
41 338 in *P. canaliculata*'s stress resistance. UPR system, Xenobiotic biotransformation  
42  
43  
44 339 system and ROS system are major components of the Cellular homeostasis system,  
45  
46  
47 340 and especially P450s expands with specific functions. In addition, exclusive  
48  
49  
50 341 perivitellin genes are characterized from the *P. canaliculata* genome, contributing to  
51  
52  
53 342 the high reproductive rate and the expansion of habitats. Furthermore, the gut  
54  
55  
56 343 metagenome encodes rich genes for food digestion and xenobiotics degradation.  
57  
58  
59 344 These findings collectively provide novel insight into the molecular mechanisms of  
60  
61  
62 345 the ecological plasticity and high invasiveness.  
63  
64  
65

1 346 The rich phenotypic and genetic diversity of molluscs make them an excellent species  
2  
3 347 group to address many valuable issues about evolution, ecology and function.  
4  
5  
6 348 However, the genomic resource of Mollusca is still insufficient compared with other  
7  
8  
9 349 close phylums, such as Arthropoda and Nematoda, and few molluscs could be  
10  
11 350 employed as model organism. *P. canaliculata* possesses potential to be a model  
12  
13 351 organism of molluscs because of several inherent characters. For example, *P.*  
14  
15 352 *canaliculata* is easy to acquire, for it has a broad global distribution originated from a  
16  
17 353 primarily circumtropical environment. Due to the high adaptability, rapid growth and  
18  
19 354 efficient reproduction, *P. canaliculata* also facilitate the cultivation in laboratory. We  
20  
21 355 report a fine reference genome of *P. canaliculata* in the present study, which is the  
22  
23 356 first chromosome level genome published in Mollusca. As the cellular complexity and  
24  
25 357 the conservation of pathways, *P. canaliculata* could be a representative of Mollusca,  
26  
27 358 so the genome described in this study can be used to advance our understanding of the  
28  
29 359 molecular mechanisms for various scientific issues in Mollusca.  
30  
31  
32  
33  
34  
35  
36  
37  
38  
39  
40  
41  
42  
43

44 360

## 45 **Methods**

### 46 **Samples collection and sequencing**

47  
48 362 Adults of *P. canaliculata* were collected from a local paddy field in Shenzhen,  
49  
50  
51 363 Guangdong province, China, and maintained in aerated freshwater at  $15 \pm 2$  °C for a  
52  
53 364 week before processing. Genomic DNA was extracted from the foot muscles of a  
54  
55 365 single *P. canaliculata* for constructing PCR free Illumina 350-bp insert libraries and  
56  
57  
58  
59  
60  
61  
62  
63  
64  
65

1 367 PacBio 20-kb insert library, and sequenced on Illumina HiSeq 2500 and PacBio  
2  
3 368 SMRT platforms, respectively. The Hi-C library was prepared using the muscle tissue  
4  
5  
6 369 of another single *P. canaliculata* by following methods: Nuclear DNA was  
7  
8  
9 370 cross-linked in situ, extracted, and then digested with a restriction enzyme. The sticky  
10  
11  
12 371 ends of the digested fragments were biotinylated, diluted, and then ligated to each  
13  
14  
15 372 other randomly. Biotinylated DNA fragments were enriched and sheared again for  
16  
17  
18 373 preparing the sequencing library, which was then sequenced on a HiSeq X Ten  
19  
20 374 platform (Illumina).

21  
22 375 Seven tissues including embryos (2 days post fertilization), gill, hemocytes,  
23  
24  
25 376 hepatopancreas, kidney, ovary and testis from six animals were collected as parallel  
26  
27  
28 377 samples. Next, animals were cultivated in 37 °C and 10 °C for 24 hours heat and cold  
29  
30  
31 378 tolerance, in Cr<sup>3+</sup>(2mg L<sup>-1</sup>), Cu<sup>2+</sup>(0.2mg L<sup>-1</sup>) and Pb<sup>2+</sup>(1mg L<sup>-1</sup>) for 24 hours heavy  
32  
33  
34 379 metal tolerance, and in waterless tank for 7 days air exposure. Then the hemocytes  
35  
36  
37 380 were harvested and stored, with three replicates for each group. In final, total  
38  
39  
40 381 messenger RNAs (mRNA) were extracted from the stored tissues of *P. canaliculata*  
41  
42  
43 382 materials for constructing cDNA libraries (insert 350-bp), and sequenced on an  
44  
45 383 Illumina HiSeq 2500 sequencer.

46  
47 384 The intestinal digesta from 70 adult snails of *P. canaliculata* were collected, pooled  
48  
49  
50 385 into 6 samples and stored at -20 °C until microbial DNA was extracted. A  
51  
52  
53 386 combination of cell lysis treatments was applied, including five freeze-thaw cycles  
54  
55  
56 387 (alternating between 65 °C and liquid nitrogen for 5 min), repeated beads-beating in  
57  
58  
59 388 ASL buffer (cat. no. 19082; Qiagen Inc.), and incubated at 95 °C for 15 min. DNA  
60  
61  
62  
63  
64  
65

1 389 was isolated following the protocol reported protocol [75]. Paired-end libraries of  
2  
3 390 metagenomic DNA were prepared with an insert size of 350 base pairs (bp) following  
4  
5  
6 391 the manufacture's protocol (cat. no. E7645L; New England Biolabs). Sequencing was  
7  
8  
9 392 performed on Illumina HiSeq X10.

10  
11 393

### 12 13 14 15 394 **Genome assembly and annotation**

16  
17  
18  
19 395 The Illumina raw reads were filtered by trimming the adapter sequence and  
20  
21  
22 396 low-quality part, resulting in a clean and high-quality reads data with average error  
23  
24  
25 397 rate < 0.001. For the PacBio raw data, the short subreads (< 2 kb) and low-quality  
26  
27  
28 398 (error rate > 0.2) subreads were filtered out, and only one representative subread was  
29  
30  
31 399 retained for each PacBio read. The clean PacBio reads were assembled by the  
32  
33 400 software `samrtdenovo` (<https://github.com/ruanjue/smartdenovo>), then Illumina  
34  
35  
36 401 reads were aligned to the contigs by BWA-MEM, and single base errors in the contigs  
37  
38  
39 402 were corrected by Pilon (v1.16) with parameters “-fix bases, -nonpf, -minqual 20”.

40  
41 403 The *P. canaliculata* genome is highly heterozygous illustrated by the double peaks on  
42  
43  
44 404 the distribution curve of K-mer frequency, and current assembly algorithm tends to  
45  
46  
47 405 collapse homozygous regions and report heterozygous regions in alternative contigs.  
48  
49  
50 406 To get a haploid reference contigs, we employed a whole-genome alignment (WGA)  
51  
52  
53 407 strategy by MUMmer v3.23 to recognize and selectively remove alternative  
54  
55  
56 408 heterozygous contigs, which were characterized by shorter length (less than 200 kb)  
57  
58  
59 409 and most regions (larger than 50%) can be aligned to another larger contig with  
60

1 410 confident identity (higher than 80%). Next, Hi-C sequencing data were aligned to the  
2  
3 411 haploid reference contigs by BWA-MEM, and then these contigs were clustered into  
4  
5  
6 412 chromosomes with LACH-ESIS (<http://shendurelab.github.io/LACHESIS/>).  
7  
8  
9 413 The gene models in *P. canaliculata* genome were predicted by Evidence Modeler  
10  
11 414 v1.1.1 [76], integrating evidences from ab initio predictions, homology-based  
12  
13  
14 415 searches and RNA-seq alignments. Then, the protein-coding sequences were mapped  
15  
16  
17 416 by RNA-seq data and functionally annotated using UniProt and InterProScan  
18  
19  
20 417 (5.16-55.0) databases [77]. Finally, the gene models were retained if they had at least  
21  
22  
23 418 one supporting evidence from UniProt database, InterProScan domain and RNA-seq  
24  
25  
26 419 data. Gene functional annotation was performed by aligning the protein sequences to  
27  
28  
29 420 NCBI NR, UniProt, COG and KEGG databases with BLASTP v2.3.0+ under E-value  
30  
31  
32 421 cutoff of  $10^{-5}$  and choosing the best hit. The pathway analysis and functional  
33  
34  
35 422 classification were conducted based on KEGG database [78]. InterProScan was used  
36  
37  
38 423 to assign preliminary GO terms, Pfam domains and IPR domains to the gene models.  
39  
40  
41 424 A de novo repeat library for *P. canaliculata* was constructed by RepeatModeler  
42  
43  
44 425 (v1.0.4; <http://www.repeatmasker.org/RepeatModeler.html>). TEs in the *P. canaliculata*  
45  
46  
47 426 genome were also identified by RepeatMasker (v4.0.6; <http://www.repeatmasker.org/>)  
48  
49  
50 427 using both Repbase library and the de novo library. Tandem repeats in the *P.*  
51  
52  
53 428 *canaliculata* genome were predicted using Tandem Repeats Finder v4.07b [79]. The  
54  
55  
56 429 divergence rates of TEs were calculated between the identified TE elements in the  
57  
58  
59 430 genome and their consensus sequence at the TE family level.  
60  
61  
62 431

1  
2  
3  
4  
5  
6  
7  
8  
9  
10  
11  
12  
13  
14  
15  
16  
17  
18  
19  
20  
21  
22  
23  
24  
25  
26  
27  
28  
29  
30  
31  
32  
33  
34  
35  
36  
37  
38  
39  
40  
41  
42  
43  
44  
45  
46  
47  
48  
49  
50  
51  
52  
53  
54  
55  
56  
57  
58  
59  
60  
61  
62  
63  
64  
65

432 **Evolutionary analysis**

433 Orthologous and paralogous groups were assigned from seven species (*P.*  
434 *canaliculata*, *Lottia gigantea*, *Aplysia californica*, *Biomphalaria glabrata*, *Crassostrea*  
435 *gigas*, *Octopus bimaculoides* and *Lingula anatina*) by OrthoFinder [45] with default  
436 parameters. Orthologous groups that contain only one gene for each species were  
437 selected to construct the phylogenetic tree. The protein sequences of each gene family  
438 was independently aligned by muscle v3.8.31 [80] and then concatenated into one  
439 super-sequence. The phylogenetic tree was constructed by maximum likelihood (ML)  
440 using PhyML v3.0 [43] with best-fit model (LG+I+G) that was estimated by ProtTest3  
441 [81]. The Bayesian Relaxed Molecular Clock (BRMC) approach was adopted to  
442 estimate the neutral evolutionary rate and species divergence time using the program  
443 MCMCTree, implemented in PAML v4.9 package [44]. The calibration time (fossil  
444 record time) interval (173-398 Mya) of *Octopus bimaculoides* was adopted from  
445 previous results.

446  
447 **Transcriptome data analysis**

448 Transcriptome reads were mapped to the reference genome of *P. canaliculata* using  
449 TopHat (v. 2.1.0) with default settings. The expression level of each reference gene in  
450 terms of FPKM was computed by cufflinks v2.2.1. A gene was considered to be  
451 expressed if its FPKM >0. Differential gene expression analysis was conducted using  
452 cuffdiff v2.2.1.



1 453

2  
3  
4 454 **Metagenome data analysis**

5  
6  
7  
8 455 Raw reads were cleaned to exclude adapter sequences, low quality sequence, as well  
9  
10  
11 456 as contaminated DNA. The adapter sequence in reads were identified and trimmed by  
12  
13  
14 457 an ungapped dynamic programming algorithm; the low-quality part (head or tail) of  
15  
16  
17 458 reads were trimmed off to ensure that the average error rate of the left reads is lower  
18  
19 459 than 0.001; the reads that mapped to the contaminated DNA by BWA-MEM [82] were  
20  
21  
22 460 filtered out; finally, shorter reads (length < 75-bp) and unpaired reads were excluded  
23  
24  
25 461 to form a clean reads data. The BWA database built for cleaning contamination  
26  
27 462 included genomes of 10 species: *P. canaliculata* genome, *Brassica rapa* genome,  
28  
29  
30 463 *Oryza sativa* genome, 2 *Angiostrongylus cantonensis* genomes, *Caenorhabditis*  
31  
32  
33 464 *elegans* genome, *schistosoma mansoni* genome, *clonorchis sinensis* genome, *fasciola*  
34  
35  
36 465 *hepatica* genome, *Danio rerio* genome, and *human hg38* genome.

37  
38 466 The clean reads were assembled by metaSPAdes (v3.11.1) [83] under pair-end mode  
39  
40  
41 467 for each sample, then gene prediction was performed on contigs longer than 500 bp  
42  
43  
44 468 by Prodigal (v2.6.3) [84] with parameter “-p meta”, and gene models with cds length  
45  
46  
47 469 less than 102 bp were filtered out. A non-redundant (NR) gene set (539,344 genes)  
48  
49  
50 470 was constructed using the gene models predicted from each samples by cd-hit-est  
51  
52  
53 471 (v4.6.6) [85] with parameter “-c 0.95 -n 10 -G 0 -a S 0.9”, which adopts a greedy  
54  
55  
56 472 incremental clustering algorithm and the criteria of identity > 95% and overlap > 90%  
57  
58 473 of the shorter genes. Then, the clean reads were mapped onto this NR gene set by

1 474 BWA-MEM with the criteria of alignment length  $\geq$  50bp and identity  $>$  95%. The  
2  
3 475 unmapped reads from all samples were assembled together, and genes were predicted  
4  
5  
6 476 again. The newly predicted genes were combined with the previous gene set by  
7  
8  
9 477 cd-hit-est to get a new NR gene set (1,147,339 genes). After the taxonomic  
10  
11  
12 478 assignments to the new NR gene set, 5244 genes classified as Eukaryota but not fungi  
13  
14  
15 479 were removed, and the final NR gene set (1,142,095 genes) was obtained.  
16  
17 480 Taxonomic assignments for the final NR genes were made on the basis of DIAMOND  
18  
19  
20 481 [86] protein alignment against the NCBI-NR database by CARMA3 [87]. Functional  
21  
22  
23 482 annotation was performed by aligning all the protein sequences to the KEGG [88]  
24  
25  
26 483 database (release 79) using DIAMOND and taking the best hit with the criteria of  
27  
28  
29 484 E-value  $<$   $1e-5$ . CAZymes were annotated with dbCAN (release 5.0) [89] using  
30  
31  
32 485 HMMER (v3.0) hmmscan [90] by taking the best hit with E-value  $<$   $1e-18$  and  
33  
34  
35 486 coverage  $>$  0.35.  
36  
37 487 The clean reads from each sample were aligned against the gene catalog (1,142,095  
38  
39  
40 488 genes) by BWA-MEM with the criteria of alignment length  $\geq$  50bp and identity  $>$   
41  
42  
43 489 95%. Sequence-based gene abundance profiling was performed as previously  
44  
45  
46 490 described [91]. Taxonomic profiles of the samples were calculated by adding the gene  
47  
48  
49 491 abundance together according to the taxonomic assignment result.  
50  
51  
52  
53 492  
54  
55  
56  
57  
58  
59  
60  
61  
62  
63  
64  
65

1      494    **Abbreviations**

2  
3  
4  
5      495    *P. Canaliculata, Pomacea canaliculata; L. gigantean, Lottia gigantean;*  
6  
7  
8      496    *A. California, Aplysia California; B. glabrata, Biomphalaria glabrata; C. gigas,*  
9  
10  
11     497    *Crassostrea gigas; O. bimaculoides, Octopus bimaculoides; L. anatine, Lingula*  
12  
13     498    *anatine; P. fucata, Pinctada fucata; Hem, hemocyte; Te, testis; Ov, ovary; Kn, kidney;*  
14  
15  
16     499    GI, gill; Hp, hepatopaneas, Em, embryo; SSR, simple sequence repeats; mya,  
17  
18     500    million years ago; *BLAST, basic local alignment search tool; SNP, single nucleotide*  
19  
20     501    polymorphism; PVF, Pervitelline Fluid; Ovo, ovorubin; AFLP, amplified fragment  
21  
22     502    length polymorphism; DEGs, differentially expressed genes; LPyS,  
23  
24     503    Lipopolysaccharide; iTRAQ, Isobaric Tags For Relative, Absolute Quantitation;  
25  
26     504    LC-MS/MS, Liquid Chromatography-tandem Mass Spectrometry; TEs, transposable  
27  
28     505    elements; LTR, long terminal repeats; LINE, long interspersed elements; SINE, short  
29  
30     506    interspersed elements; UPR, Unfolded protein response; HSPs, heat shock proteins;  
31  
32     507    HSF1, heat shock transcription factor 1; PERK, protein kinase RNA-like ER kinase;  
33  
34     508    ATF6,activating transcription factor 6; ER, endoplasmic reticulum; CYP450s,  
35  
36     509    cytochrome P450s; FMOs, flavin-containing monooxygenases; GSTs, glutathione  
37  
38     510    S-transferases; ABC, ATP binding cassette; ROS, reactive oxygen species; ROI,  
39  
40     511    reactive oxygen intermediates; SOD, superoxide dismutase; CAT, catalase; Prx,  
41  
42     512    peroxidase; GPX, glutathione peroxidase; TNFR, tumor necrosis factor receptor;  
43  
44     513    NR, non-redundant genes; ORF, open reading frame; Kos, orthologous groups;  
45  
46     514    CAZymes, carbohydrate active enzymes; GH, Glycoside Hydrolase.  
47  
48  
49  
50  
51  
52  
53  
54  
55  
56  
57  
58  
59  
60  
61  
62  
63  
64  
65

1 515

2  
3  
4  
5 516 **Availability of data and materials**

6  
7  
8  
9  
10 517 Tables S1 to S11 and Figures S1 to S4 are available in the supplementary information  
11  
12 518 file. The raw sequencing data has been deposited in DDBJ/EMBL/GenBank under  
13  
14  
15 519 project accession PRJNA427478, SRR6425828 for genomic Illumina\_PE125  
16  
17  
18 520 sequencing data, SRR6425829 for genomic Illumina\_PE150 sequencing data,  
19  
20  
21 521 SRR6425827 for genomic Pacbio sequencing data, SRR6429132~SRR6429164 for  
22  
23  
24 522 transcriptome sequencing data, and SRR6472920~SRR6472925 for gut microbiome  
25  
26 523 data. All the analysis data have also been released for public use and can be freely  
27  
28  
29 524 accessed at AGIS  
30  
31  
32 525 [ftp://ftp.agis.org.cn/~fanwei/Pomacea\\_canaliculata\\_Genome/](ftp://ftp.agis.org.cn/~fanwei/Pomacea_canaliculata_Genome/) .  
33  
34  
35

36 526 **Authors' contributions**

37  
38  
39  
40  
41 527 WF and WQ conceived the study and designed the experiments. CL and YZ  
42  
43 528 performed the genome sequencing and assembly, BL performed annotation and  
44  
45  
46 529 evolutionary analysis. CL performed the stress tolerance analysis, YR performed the  
47  
48  
49 530 reproduction analysis, YZ performed the metagenome analysis. HW, SL, FJ, LY  
50  
51  
52 531 provide suggestions and help checking. WF, CL, BL, YR, YZ wrote the manuscript,  
53  
54  
55 532 and GZ help revise the manuscript. All authors read and approved the final  
56  
57 533 manuscript.  
58  
59

60 534

1  
2  
3  
4  
5  
6  
7  
8  
9  
10  
11  
12  
13  
14  
15  
16  
17  
18  
19  
20  
21  
22  
23  
24  
25  
26  
27  
28  
29  
30  
31  
32  
33  
34  
35  
36  
37  
38  
39  
40  
41  
42  
43  
44  
45  
46  
47  
48  
49  
50  
51  
52  
53  
54  
55  
56  
57  
58  
59  
60  
61  
62  
63  
64  
65

535 **Competing interests**

536 The authors declare that they have no competing interests.

537 **Acknowledgements**

538 This project is supported by the National key research and development program of  
539 China (2016YFC1200600), Shenzhen science and technology program  
540 (JCYJ20150630165133395), Fund of Key Laboratory of Shenzhen  
541 (ZDSYS20141118170111640), and The Agricultural Science and Technology  
542 Innovation Program (ASTIP) of Chinese Academy of Agricultural Sciences(CAAS) &  
543 Elite Youth Program of Chinese Academy of Agricultural Sciences. We thank  
544 Fanghao Wan, Jue Ruan, Yutao Xiao for providing constructive suggestions to this  
545 project.

546  
547  
548  
549  
550  
551  
552

## 553 Legends of Tables and Figures

### 554 Tables

555 **Table 1. Summary of assembly and annotation of mollusk genomes**

| Genome feature             | <i>P. canaliculata</i> | <i>L. gigantea</i> | <i>A. californica</i> | <i>B. glabrata</i> | <i>C. gigas</i> | <i>O. bimaculoides</i> |
|----------------------------|------------------------|--------------------|-----------------------|--------------------|-----------------|------------------------|
| Assembled sequences (bp)   | 440,071,717            | 359,505,668        | 927,310,431           | 916,377,450        | 557,735,934     | 2,3381,887,882         |
| Contig N50 size (bp)       | 1,072,857              | 94,165             | 9,817                 | 18,978             | 37,218          | 5,982                  |
| Contig N90 size (bp)       | 303,904                | 10,180             | 1,626                 | 5,132              | 11,109          | 1,606                  |
| Scaffold N50 size (bp)     | 31,531,291             | 1,870,055          | 917,541               | 48,059             | 401,685         | 475,182                |
| Scaffold N90 size (bp)     | 23,662,357             | 74,480             | 207,390               | 817                | 68,181          | 79,088                 |
| GC content (%)             | 40.3                   | 33.3               | 40.3                  | 36.0               | 33.4            | 36                     |
| No. of gene models         | 21,533                 | 23,824             | 19,909                | 14,224             | 28,402          | 15,814                 |
| Avg. CDS length (bp)       | 1,497                  | 1,136              | 1,568                 | 1,066              | 1,472           | 1,535                  |
| BUSCO (%)                  | 98.9                   | 98.4               | 98.7                  | 72.8               | 99.4            | 98.7                   |
| Transposable elements (bp) | 49,579,006             | 37,369,817         | 202,174,499           | 189,550,886        | 103,381,274     | 737,398,096            |
| Tandem repeat (bp)         | 873,801                | 257,674            | 8,263,822             | 2,145,821          | 590,907         | 62,633,792             |

556

### 557 Figures

558 **Figure 1. The genome characteristics of *P. canaliculata*.** (a) Circos plot showing the  
559 genomic features. Track 1: 14 linkage groups of the genome; Track 2: distribution of  
560 transposon elements in chromosomes; Track 3: protein-coding genes located on  
561 chromosomes; Track 4: distribution of GC contents. (b) A genome-wide contacting  
562 matrix from Hi-C data between each pair of the 14 chromosomes, using 100 kb  
563 window size. The color value means the logarithm of valid reads to base 2 ( $\log_2(\text{valid}$   
564 reads)). (c) Distribution of CDS length in six closely related species.

565

566 **Figure 2. Evolutionary genomic analysis between *P. canaliculata* and other**  
567 **molluscs.** (a) Phylogenetic placement of *P. canaliculata* within the molluscs dated  
568 tree. The estimated divergence time were shown on each branching point, the species  
569 marked with red color was *P. canaliculata*. (b) Distribution of divergence rate for the  
570 class of DNA transposons in molluscs genomes. The divergence rate was calculated  
571 by comparing all TE sequences identified in the genome to its corresponding

1 572 consensus sequence in each TE subfamily. The red arrow indicates the *P. canaliculata*  
2 573 and *C. gigas* had a recent explosion of TEs at ~4% divergence rate.  
3

4 574

5 575 **Figure 3. The cellular homeostasis system in *P. canaliculata*.** Unfolded protein  
6  
7 576 response (UPR) system included HSPs and HSF in the heat shock response and CNX,  
8  
9 577 NEF, GRP94, BIP, HSP40, ATF6, IRE1, PERK, COP2, XBP, ATF4, TRAM and  
10  
11 578 Derlin in the endoplasmic reticulum unfolded-protein response (UPR-ERAD).  
12  
13 579 Apoptotic pathways included XIAPs, Bcl2, caspases, TNFR, and FADD. The  
14  
15 580 antioxidant systems included PRX, SOD, CAT and GPX. The xenobiotic  
16  
17 581 biotransformation system included EPHX3, P450, FMO and ABC transporter. Gene  
18  
19 582 boxes for gene families with the filled colors represent the degree of upregulation  
20  
21 583 (FPKM-stimulus/FPKM-control) by an overall result of stress including heat, cold,  
22  
23 584 heavy metal and air exposure. Pathways and genes were obtained based on KEGG  
24  
25 585 annotation.  
26  
27  
28  
29  
30  
31  
32  
33  
34  
35  
36  
37  
38  
39

40 586

41 587 **Figure 4. The expansion of P450 gene family in *P. canaliculata*.** (a) Phylogenetic  
42  
43 588 tree demonstrating orthologous and paralogous relationships of all P450 genes from 7  
44  
45 589 species including *P. canaliculata*, *A. californica*, *B. glabrata*, *C. gigas*, *L. gigantea*,  
46  
47 590 *O. bimaculoides* and *P. fucata*. P450 genes from seven species were obtained based  
48  
49 591 Pfam annotation (Interpro) with the E-value  $10^{-5}$ . Clades are labeled by P450  
50  
51 592 subfamily names. The tree was constructed using the Maximum likelihood method in  
52  
53 593 MEGA7, and branch length scale indicates average residue substitutions per site. (b)  
54  
55 594 Phylogenetic tree of P450 genes in *P. canaliculata*, which is a subset of the  
56  
57  
58  
59  
60  
61  
62  
63  
64  
65

1 595 phylogenetic tree for the 7 species, and their heat map of expression (FPKM) in seven  
2  
3 596 tissues (Hem, hemocyte; Te, testis; Ov, Ovary; Kn, kidney; Gl, gill; Hp,  
4  
5  
6 597 hepatopancreas; Em, Embryo), and heat map of induced expression  
7  
8  
9 598 (FPKM-stimulus/FPKM-control) under stress (Con: control; heat; cold; Hm: heavy  
10  
11  
12 599 metal; Exp: air exposure).

13  
14  
15 600

16  
17 601 **Figure 5. The *P. canaliculata* perivitellins composition and expression in different**  
18  
19  
20 602 **tissues.** (a) Pervitelline Fluid (PVF) is under the eggshell and surrounds the embryo, it  
21  
22  
23 603 contains carbohydrates, lipids, proteins, and the proteins is also known as perivitellins  
24  
25  
26 604 and classified into three categories of PcOvo, PcPV2, PcPV3. (b) The shown  
27  
28  
29 605 expression value is the logarithm of FPKM to base 2 ( $\log_2$ FPKM). The first 3 letters  
30  
31  
32 606 in each gene ID refer to three classes of perivitellins, uPV means unclassified  
33  
34  
35 607 perivitellins, PV2 means PcPV2, Ovo means PcOvo. Abbreviations were used for 7  
36  
37  
38 608 tissues (Hem, hemocyte; Te, testis; Ov, Ovary; Kn, kidney; Gl, gill; Hp,  
39  
40  
41 609 hepatopancreas; Em, Embryo).

42 610  
43  
44  
45

## 46 611 **References**

- 47  
48  
49  
50  
51 612 1. Lowe S, Browne M, Boudjelas S, de Poorter M. 100 of the World's Worst Invasive Alien  
52  
53  
54 613 Species: A selection from the Global Invasive Species Database. Auckland, New Zealand:  
55  
56  
57 614 World Conservation Union (IUCN); 2000.
- 58  
59 615 2. Ranamukhaarachchi SL, Wickramasinghe S. Golden apple snails in the world:  
60  
61



- 1 616 introduction, impact, and control measures. Global advances in ecology and  
2  
3  
4 617 management of golden apple snails. 2006:133-52.  
5  
6 618 3. Naylor R. Invasions in Agriculture: Assessing the Cost of the Golden Apple Snail in Asia.  
7  
8  
9 619 Royal Swedish Academy of Sciences. 1996;25:443-8.  
10  
11 620 4. Berthold T. Vergleichende Anatomie, Phylogenie und historische Biogeographie der  
12  
13 621 Ampullariidae: (Mollusca, Gastropoda). 1991.  
14  
15  
16  
17 622 5. Howells RG, Burlakova LE, Karatayev AY, Marfurt RK, Burks RL. Native and  
18  
19  
20 623 introduced Ampullariidae in North America: History, status, and ecology. 2006:73-112.  
21  
22  
23 624 6. Halwart M, Bartley DM. International mechanisms for the control and responsible use of  
24  
25 625 alien species in aquatic ecosystems, with special reference to the golden apple snail. Los  
26  
27  
28 626 Baños, Philippines: Philippine Rice Research Institute (PhilRice); 2006.  
29  
30  
31 627 7. López MA, Altaba CR, Andree KB, López V. First invasion of the Apple snail *Pomacea*  
32  
33 628 *insularum* in Europe. *Tentacle*. 2010;18:26-8.  
34  
35  
36 629 8. Estebenet AL, Martín PR. *Pomacea canaliculata* (Gastropoda: Ampullariidae): life-history  
37  
38  
39 630 traits and their plasticity. *Biocell* 2002;26:83-9.  
40  
41  
42 631 9. Lach L. The spread of the introduced freshwater apple snail *Pomacea canaliculata*  
43  
44 632 (Lamarck) (Gastropoda Ampullariidae) on Oahu, Hawaii. *Bishop Museum Occasional*  
45  
46 633 *Papers*. 1999;58:66-71.  
47  
48  
49  
50 634 10. Yusa Y, Sugiura N, Wada T. Predatory Potential of Freshwater Animals on an Invasive  
51  
52  
53 635 Agricultural Pest, the Apple Snail *Pomacea canaliculata* (Gastropoda: Ampullariidae), in  
54  
55  
56 636 Southern Japan. *Biol Invasions*. 2006;8:137-47.  
57  
58  
59 637 11. Lach L, Britton DK, Rundell RJ, Cowie RH. Food Preference and Reproductive Plasticity  
60  
61  
62  
63  
64  
65

1 638 in an Invasive Freshwater Snail. *Biol Invasions*. 2000;2:279-88.

2

3 639 12. Mochida O. Spread of freshwater *Pomacea* snails (Pilidae, Mollusca) from Argentina to

4

5

6 640 Asia. *Micronesica*. 1991;3 51-62.

7

8

9 641 13. Shan L, Zhang Y, Steinmann P, Zhou X. Emerging Angiostrongyliasis in Mainland China.

10

11 642 *Emerg Infect Dis*. 2008;14:161-4.

12

13

14 643 14. Caldeira RL, Mendonca CL, Goveia CO, Lenzi HL, Graeff-TeixeiraC Lima WS, et al.

15

16

17 644 First record of molluscs naturally infected with *Angiostrongylus cantonensis* (Chen, 1935)

18

19 645 (Nematoda: Metastrongylidae) in Brazil. *Memórias do Instituto Oswaldo Cruz*.

20

21 646 2007;102:887-9.

22

23

24

25 647 15. McMichael AJ, Beaglehole R. The changing global context of public health. *Lancet*

26

27 648 (London, England). 2000;356:495-9.

28

29

30

31 649 16. Chapman A. Numbers of Living Species in Australia and the World. Australian Biological

32

33 650 Resources Study; 2009.

34

35

36 651 17. Lindberg DR, Ponder WF, Haszprunar G. The Mollusca: relationships and patterns from

37

38 652 their first half-billion years. Oxford University Press, Oxford; 2004.

39

40

41

42 653 18. Hayes KA, Cowie RH, Thiengo SC. A global phylogeny of apple snails: Gondwanan

43

44 654 origin, generic relationships, and the influence of outgroup choice (Caenogastropoda:

45

46 655 Ampullariidae). *Biol J Linn Soc Lond*. 2009;98:61-76.

47

48

49

50 656 19. Matsukura K, Tsumuki H, Izumi Y, Wada T. Physiological response to low temperature in

51

52 657 the freshwater apple snail, *Pomacea canaliculata* (Gastropoda: Ampullariidae). *J Exp*

53

54 658 *Biol*. 2009;212:2558-63.

55

56

57

58 659 20. Yusa Y, Wada T, Takahashi S. Effects of dormant duration, body size, self-burial and

59

60

61

62

63

64

65

1 660 water condition on the long-term survival of the apple snail, *Pomacea canaliculata*  
2  
3 661 (Gastropoda: Ampullariidae). Appl Entomol Zool. 2006;41:627-32.  
4  
5  
6 662 21. Kruatrachue M, Sumritdee C, Pokethitiyook P, Singhakaew S. Histopathological effects  
7  
8  
9 663 of contaminated sediments on golden apple snail (*Pomacea canaliculata*, Lamarck 1822).  
10  
11 664 Bull Environ Contam Toxicol. 2011;86:610-4.  
12  
13  
14 665 22. Dreon MS, Frassa MV, Ceolín M, Ituarte S, Qiu JW, Sun J, et al. Novel animal defenses  
15  
16  
17 666 against predation: a snail egg neurotoxin combining lectin and pore-forming chains that  
18  
19  
20 667 resembles plant defense and bacteria attack toxins. PLoS One. 2013;8:e63782.  
21  
22 668 doi:10.1371/journal.pone.0063782.  
23  
24  
25 669 23. Ottaviani E, Caselgrandi E, Fontanili P, Franceschi C. Evolution, immune responses and  
26  
27  
28 670 stress: studies on molluscan cells. Acta Biol Hung. 1992;43:293-8.  
29  
30  
31 671 24. Ottaviani E, Accorsi A, Rigillo G, Malagoli D, Blom JM, Tascetta F. Epigenetic  
32  
33  
34 672 modification in neurons of the mollusc *Pomacea canaliculata* after immune challenge.  
35  
36 673 Brain Res. 2013;1537:18-26.  
37  
38  
39 674 25. Mercado Laczkó AC, Lopretto EC. Estudio cromosómico y cariotípico de *pomacea*  
40  
41  
42 675 *canaliculata* (Lamarck, 1801) (Gastropoda, Ampullariidae). Revista del Museo Argentino  
43  
44  
45 676 de Ciencias Naturales "Bernardino Rivadavia" Hidrobiología. 1998;8:15-20.  
46  
47  
48 677 26. Xu J, Han X, Li N, Yu J, Qian C, Bao Z. Analysis of genetic diversity of three geographic  
49  
50  
51 678 populations of *Pomacea canaliculata* by AFLP. Acta Ecol Sin. 2009;29:4119- 26.  
52  
53  
54 679 27. Chen L, Xu H, Li H, Wu J, Ding H, Liu Y. Isolation and characterization of sixteen  
55  
56 680 polymorphic microsatellite loci in the golden apple snail *Pomacea canaliculata*. Int J Mol  
57  
58  
59 681 Sci. 2011;12:5993-8.

1 682 28. Mu X, Hou G, Song H, Xu P, Luo D, Gu D, et al. Transcriptome analysis between  
2  
3 683 invasive *Pomacea canaliculata* and indigenous *Cipangopaludina cahayensis* reveals  
4  
5  
6 684 genomic divergence and diagnostic microsatellite/SSR markers. BMC Genet. 2015;16:12.  
7  
8  
9 685 29. Sun J, Wang M, Wang H, Zhang H, Zhang X, Thiyagarajan V, et al. De novo assembly of  
10  
11 686 the transcriptome of an invasive snail and its multiple ecological applications. Mol Ecol  
12  
13 687 Resour. 2012;12:1133-44.  
14  
15  
16  
17 688 30. Mu H, Sun J , Fang L, Luan T, Williams GA, Cheung SG, et al. Genetic Basis of  
18  
19  
20 689 Differential Heat Resistance between Two Species of Congeneric Freshwater Snails:  
21  
22 690 Insights from Quantitative Proteomics and Base Substitution Rate Analysis. J Proteome  
23  
24 691 Res. 2015;14:4296-308.  
25  
26  
27  
28 692 31. Yang L, Cheng TY, Zhao FY. Comparative profiling of hepatopancreas transcriptomes in  
29  
30 693 satiated and starving *Pomacea canaliculata*. BMC Genet. 2017;18:18.  
31  
32  
33  
34 694 32. Xiong YM, Yan ZH, Zhang JE, Li HY. Analysis of albumen gland proteins suggests  
35  
36 695 survival strategies of developing embryos of *Pomacea canaliculata*. Molluscan Res.  
37  
38 696 2017:1-6.  
39  
40  
41  
42 697 33. Sun J, Mu H , Zhang H, Chandramouli KH, Qian PY, Wong CK, et al. Understanding the  
43  
44 698 regulation of estivation in a freshwater snail through iTRAQ-based comparative  
45  
46 699 proteomics. J Proteome res. 2013;12:5271-80.  
47  
48  
49  
50 700 34. Sun J, Zhang H, Wang H, Heras H, Dreon MS, Ituarte S, et al. First proteome of the egg  
51  
52 701 perivitelline fluid of a freshwater gastropod with aerial oviposition. J Proteome Res.  
53  
54 702 2012;11:4240-8.  
55  
56  
57  
58 703 35. Aplysia Genome Project. Broad Institute. Vertebrate Biology Group. 2009.  
59  
60  
61  
62  
63  
64  
65

1 704 <https://www.broadinstitute.org/aplysia/aplysia-genome-project>

2

3 705 36. Zhang G, Fang X, Guo X, Li L, Luo R, Xu F, et al. The oyster genome reveals stress

4

5

6 706 adaptation and complexity of shell formation. *Nature*. 2012;490:49-54.

7

8

9 707 37. Takeuchi T, Kawashima T, Koyanagi R, Gyoja F, Tanaka M, Ikuta T, et al. Draft genome

10

11 708 of the pearl oyster *Pinctada fucata*: a platform for understanding bivalve biology. *DNA*

12

13 709 *Res*. 2012;19:117-30.

14

15

16

17 710 38. Simakov O, Marletaz F, Cho SJ, Edsinger-Gonzales E, Havlak P, Hellsten U, et al.

18

19 711 Insights into bilaterian evolution from three spiralian genomes. *Nature*. 2013;493:526-31.

20

21

22 712 39. Albertin CB, Simakov O, Mitros T, Wang ZY, Pungor JR, Edsinger-Gonzales E, et al. The

23

24 713 octopus genome and the evolution of cephalopod neural and morphological novelties.

25

26 714 *Nature*. 2015;524:220-4.

27

28

29 715 40. Sun J, Zhang Y, Xu T, Zhang Y, Mu H, Zhang Y, et al. Adaptation to deep-sea

30

31 716 chemosynthetic environments as revealed by mussel genomes. *Nat Ecol Evol*. 2017;1:121.

32

33 717 doi:10.1038/s41559-017-0121.

34

35

36

37 718 41. Adema CM, Hillier LW, Jones CS, Loker ES, Knight M, Minx P, et al. Corrigendum:

38

39 719 Whole genome analysis of a schistosomiasis-transmitting freshwater snail. *Nat Commun*.

40

41 720 2017;8:16153.

42

43

44 721 42. Liu B, Shi Y, Yuan J, Hu X, Zhang H, Li N, et al. Estimation of genomic characteristics

45

46 722 by analyzing k-mer frequency in de novo genome projects. *Quantitative Biology*

47

48 723 2013:arXiv:1308.2012 [q-bio.GN].

49

50

51 724 43. Guindon S, Dufayard JF, Lefort V, Anisimova M, Hordijk W, Gascuel O. New algorithms

52

53 725 and methods to estimate maximum-likelihood phylogenies: assessing the performance of

54

55

56

57

58

59

60

61

62

63

64

65

1 726 PhyML 3.0. Syst Biol 2010;59:307-21. doi:10.1093/sysbio/syq010.  
2  
3 727 44. Yang Z. PAML 4: phylogenetic analysis by maximum likelihood. Mol Biol Evol.  
4  
5  
6 728 2007;24:1586-91. doi:10.1093/molbev/msm088.  
7  
8  
9 729 45. Emms DM, Kelly S. OrthoFinder: solving fundamental biases in whole genome  
10  
11 730 comparisons dramatically improves orthogroup inference accuracy. Genome Biol.  
12  
13 731 2015;16:157. doi:10.1186/s13059-015-0721-2.  
14  
15  
16  
17 732 46. Feschotte C, Wessler SR. Mariner-like transposases are widespread and diverse in  
18  
19 733 flowering plants. Proc Natl Acad Sci U S A 2002;99:280-5.  
20  
21  
22 734 47. Hua-Van A, Le Rouzic A, Boutin TS, Filée J, Capy P. The struggle for life of the  
23  
24 735 genome's selfish architects. Biol Direct. 2011;6:19.  
25  
26  
27  
28 736 48. Werren JH. Selfish genetic elements, genetic conflict, and evolutionary innovation. Proc  
29  
30 737 Natl Acad Sci U S A. 2011;108 Suppl 2:10863-70.  
31  
32  
33  
34 738 49. Chrousos GP. Stress and disorders of the stress system. Nat Rev Endocrinol.  
35  
36 739 2009;5:374-81.  
37  
38  
39 740 50. Vabulas RM, Raychaudhuri S, Hayer-Hartl M. Protein folding in the cytoplasm and the  
40  
41 741 heat shock response. Cold Spring Harbor perspectives in biology. 2010;2:a004390.  
42  
43  
44 742 51. Chen B, Retzlaff M, Roos T, Frydman J. Cellular Strategies of Protein Quality Control.  
45  
46 743 Cold Spring Harbor Perspectives in Biology. 2011;3:a004374.  
47  
48  
49  
50 744 52. Korennykh A and Walter P. Structural basis of the unfolded protein response. Annu Rev  
51  
52 745 Cell Dev Biol. 2012;28:251-77.  
53  
54  
55 746 53. Chambers JE and Yarbrough JD. Xenobiotic biotransformation systems in fishes. Comp  
56  
57 747 Biochem Physiol C. 1976;55:77-84.  
58  
59  
60  
61  
62  
63  
64  
65

- 1 748 54. Mello DF, de Oliveira ES, Vieira RC, Simoes E, Trevisan R, Dafre AL, et al. Cellular and  
2  
3 749 Transcriptional Responses of *Crassostrea gigas* Hemocytes Exposed in Vitro to  
4  
5  
6 750 Brevetoxin (PbTx-2) Mar Drugs. 2012;10: 583-97.  
7  
8  
9 751 55. Boutet I, Tanguy A, Moraga D. Characterisation and expression of four mRNA sequences  
10  
11 752 encoding glutathione S-transferases pi, mu, omega and sigma classes in the Pacific oyster  
12  
13 753 *Crassostrea gigas* exposed to hydrocarbons and pesticides. Mar Biol 2004;146:53-64.  
14  
15  
16  
17 754 56. Deeley RG, Westlake C, Cole SP. Transmembrane transport of endo- and xenobiotics by  
18  
19 755 mammalian ATP-binding cassette multidrug resistance proteins. Physiol Rev.  
20  
21 756 2006;86:849-99.  
22  
23  
24  
25 757 57. Liu C, Zhang T, Wang L, Wang M, Wang W, Jia Z, et al. The modulation of extracellular  
26  
27 758 superoxide dismutase in the specifically enhanced cellular immune response against  
28  
29 759 secondary challenge of *Vibrio splendidus* in Pacific oyster (*Crassostrea gigas*). Dev  
30  
31 760 Comp Immunol. 2016;63:163-70.  
32  
33  
34  
35  
36 761 58. Lamb DC, Lei L, Warrilow AG, Lepesheva GI, Mullins JG, Waterman MR, et al. The first  
37  
38 762 virally encoded cytochrome p450. J Virol. 2009;83:8266-9.  
39  
40  
41  
42 763 59. Urlacher VB, Girhard M. Cytochrome P450 monooxygenases: an update on perspectives  
43  
44 764 for synthetic application. Trends Biotechnol. 2012;30:26-36.  
45  
46  
47 765 60. Sanderson T, van den Berg M. Topic 3.1: Interactions of xenobiotics with the steroid  
48  
49 766 hormone biosynthesis pathway. Pure Appl Chem. 2003;75:1957-71.  
50  
51  
52  
53 767 61. Goldstone JV, McArthur AG, Kubota A, Zanette J, Parente T, Jönsson ME, et al.  
54  
55 768 Identification and developmental expression of the full complement of Cytochrome P450  
56  
57 769 genes in Zebrafish. BMC Genomics. 2010;11:643.  
58  
59  
60  
61  
62  
63  
64  
65

- 1 770 62. Chuang SS, Helvig C, Taimi M, Ramshaw HA, Collop AH, Amad M, et al. CYP2U1, a  
2  
3 771 novel human thymus- and brain-specific cytochrome P450, catalyzes omega- and  
4  
5  
6 772 (omega-1)-hydroxylation of fatty acids. J Biol Chem. 2004;279:6305-14.  
7  
8  
9 773 63. Fleming I. The pharmacology of the cytochrome P450 epoxygenase/soluble epoxide  
10  
11 774 hydrolase axis in the vasculature and cardiovascular disease. Pharmacol Rev.  
12  
13 775 2014;66:1106-40.  
14  
15  
16  
17 776 64. Zhang G, Kodani S, Hammock BD. Stabilized epoxygenated fatty acids regulate  
18  
19 777 inflammation, pain, angiogenesis and cancer. Prog Lipid Res. 2014;53:108-23.  
20  
21  
22 778 65. de Jong-Brink M, Boer HH, Joosse J. Mollusca. In: Adiyodi, K.G., Adiyodi,  
23  
24 779 R.G. (Eds.), Reproductive Biology of invertebrates. Oogenesis oviposition and  
25  
26 780 oosorption, vol. 1. John Wiley & Sons Ltd., New York, 1983; pp. 297-355.  
27  
28  
29 781 66. Garin CF, Heras H, Pollero RJ. Lipoproteins of the egg perivitelline fluid of *Pomacea*  
30  
31 782 *canaliculata* snails (Mollusca: Gastropoda). J Exp Zool. 1996;276:307-14.  
32  
33  
34 783 67. Dreon MS, Schinella G, Heras H, Pollero RJ. Antioxidant defense system in the apple  
35  
36 784 snail eggs, the role of ovorubin. Arch Biochem Biophys. 2004;422:1-8.  
37  
38  
39 785 68. Dreon MS, Ituarte S, Heras H. The role of the proteinase inhibitor ovorubin in apple snail  
40  
41 786 eggs resembles plant embryo defense against predation. PLoS One. 2010;5:e15059.  
42  
43 787 doi:10.1371/journal.pone.0015059.  
44  
45  
46  
47 788 69. Cardoso AM, Cavalcante JJV, Vieira RP, Lima JL, Grieco MAB, Clementino MM, et al.  
48  
49 789 Gut Bacterial Communities in the Giant Land Snail *Achatina fulica* and Their  
50  
51 790 Modification by Sugarcane-Based Diet. Plos One. 2012;7 doi:ARTN  
52  
53 791 e3344010.1371/journal.pone.0033440.  
54  
55  
56  
57  
58  
59  
60  
61  
62  
63  
64  
65



1 792 70. Cardoso AM, Cavalcante JJV, Cantão ME, Thompson CE, Flatschart RB, Glogauer A, et  
2  
3 793 al. Metagenomic Analysis of the Microbiota from the Crop of an Invasive Snail Reveals a  
4  
5  
6 794 Rich Reservoir of Novel Genes. Plos One. 2012;7 doi:ARTN  
7  
8  
9 795 e4850510.1371/journal.pone.0048505.

10  
11 796 71. Cabrera G, Pérez R, Gómez JM, Ábalos A, Cantero D. Toxic effects of dissolved heavy  
12  
13  
14 797 metals on *Desulfovibrio vulgaris* and *Desulfovibrio* sp strains. J Hazard Mater  
15  
16  
17 798 2006;135:40-6. doi:10.1016/j.jhazmat.2005.11.058.

18  
19  
20 799 72. Finlay JA, Allan VJ, Conner A, Callow ME, Basnakova G, Macaskie LE. Phosphate  
21  
22  
23 800 release and heavy metal accumulation by biofilm-immobilized and chemically-coupled  
24  
25  
26 801 cells of a *Citrobacter* sp. pre-grown in continuous culture. Biotechnol Bioeng.  
27  
28  
29 802 1999;63:87-97.

30  
31 803 73. Valls M, de Lorenzo V, Gonzalez-Duarte R, Atrian S. Engineering outer-membrane  
32  
33  
34 804 proteins in *Pseudomonas putida* for enhanced heavy-metal bioadsorption. J Inorg  
35  
36  
37 805 Biochem. 2000;79:219-23.

38  
39 806 74. Pinheiro GL, Correa RF, Cunha RS, Cardoso AM, Chaia C, Clementino MM, et al.  
40  
41  
42 807 Isolation of aerobic cultivable cellulolytic bacteria from different regions of the  
43  
44  
45 808 gastrointestinal tract of giant land snail *Achatina fulica*. Front Microbiol. 2015;6  
46  
47  
48 809 doi:Artn 86010.3389/Fmicb.2015.00860.

49  
50 810 75. Zoetendal EG, Heilig HG, Klaassens ES, Booijink CC, Kleerebezem M, Smidt H, et al.  
51  
52  
53 811 Isolation of DNA from bacterial samples of the human gastrointestinal tract. Nature  
54  
55  
56 812 protocols 2006, 1(2): 870-873

57  
58  
59 813 76. Haas BJ, Salzberg SL, Zhu W, Perteu M, Allen JE, Orvis J, et al. Automated eukaryotic

1 814 gene structure annotation using EVIDENCEModeler and the Program to Assemble Spliced  
2  
3 815 Alignments. *Genome Biol.* 2008;9:R7.  
4  
5  
6 816 77. Quevillon E, Silventoinen V, Pillai S, Harte N, Mulder N, Apweiler R, et al. InterProScan:  
7  
8  
9 817 protein domains identifier. *Nucleic Acids Res.* 2005;33:W116-20.  
10  
11 818 78. Kanehisa M, Goto S, Sato Y, Furumichi M, Tanabe M. KEGG for integration and  
12  
13  
14 819 interpretation of large-scale molecular data sets. *Nucleic Acids Res.* 2012;40:D109-D14.  
15  
16  
17 820 79. Benson G. Tandem repeats finder: a program to analyze DNA sequences. *Nucleic Acids*  
18  
19  
20 821 *Res.* 1999;27:573-80.  
21  
22 822 80. Edgar RC. MUSCLE: multiple sequence alignment with high accuracy and high  
23  
24  
25 823 throughput. *Nucleic Acids Res.* 2004;32:1792-7.  
26  
27  
28 824 81. Darriba D, Taboada GL, Doallo R, Posada D. ProtTest 3: fast selection of best-fit models  
29  
30  
31 825 of protein evolution. *Bioinformatics.* 2011;27:1164-5. doi:10.1093/bioinformatics/btr088.  
32  
33  
34 826 82. Li H and Durbin R. Fast and accurate short read alignment with Burrows-Wheeler  
35  
36  
37 827 transform. *Bioinformatics.* 2009;25:1754-60.  
38  
39 828 83. Nurk S, Meleshko D, Korobeynikov A, Pevzner PA. metaSPAdes: a new versatile  
40  
41  
42 829 metagenomic assembler. *Genome Res.* 2017;27:824-34.  
43  
44  
45 830 84. Hyatt D, LoCascio PF, Hauser LJ, Uberbacher EC. Gene and translation initiation site  
46  
47  
48 831 prediction in metagenomic sequences. *Bioinformatics.* 2012;28:2223-30.  
49  
50 832 85. Fu L, Niu B, Zhu Z, Wu S, Li W. CD-HIT: accelerated for clustering the next-generation  
51  
52  
53 833 sequencing data. *Bioinformatics.* 2012;28:3150-2.  
54  
55  
56 834 86. Buchfink B, Chao X, Huson DH. Fast and sensitive protein alignment using DIAMOND.  
57  
58  
59 835 *Nat Methods.* 2015;12:59-60.  
60  
61  
62  
63  
64  
65

1 836 87. Gerlach W and Stoye J. Taxonomic classification of metagenomic shotgun sequences  
2  
3 837 with CARMA3. *Nucleic Acids Res.* 2011;39 doi:Artn E9110.1093/Nar/Gkr225.  
4  
5  
6 838 88. Kanehisa M, Goto S, Kawashima S, Okuno Y, Hattori M. The KEGG resource for  
7  
8  
9 839 deciphering the genome. *Nucleic Acids Res.* 2004;32:D277-80.  
10  
11 840 89. Yin Y, Mao X, Yang J, Chen X, Mao F, Xu Y. dbCAN: a web resource for automated  
12  
13 841 carbohydrate-active enzyme annotation. *Nucleic Acids Res.* 2012;40:W445-51.  
14  
15  
16 842 90. Eddy SR. Accelerated Profile HMM Searches. *Plos Comput Biol.* 2011;7 doi:ARTN  
17  
18 843 e100219510.1371/journal.pcbi.1002195.  
19  
20  
21 844 91. Qin JJ, Li YR, Cai ZM, Li SH, Zhu JF, Zhang F, et al. A metagenome-wide association  
22  
23 845 study of gut microbiota in type 2 diabetes. *Nature.* 2012;490:55-60.  
24  
25  
26  
27 846  
28  
29  
30  
31  
32  
33  
34  
35  
36  
37  
38  
39  
40  
41  
42  
43  
44  
45  
46  
47  
48  
49  
50  
51  
52  
53  
54  
55  
56  
57  
58  
59  
60  
61  
62  
63  
64  
65

Figure

**a**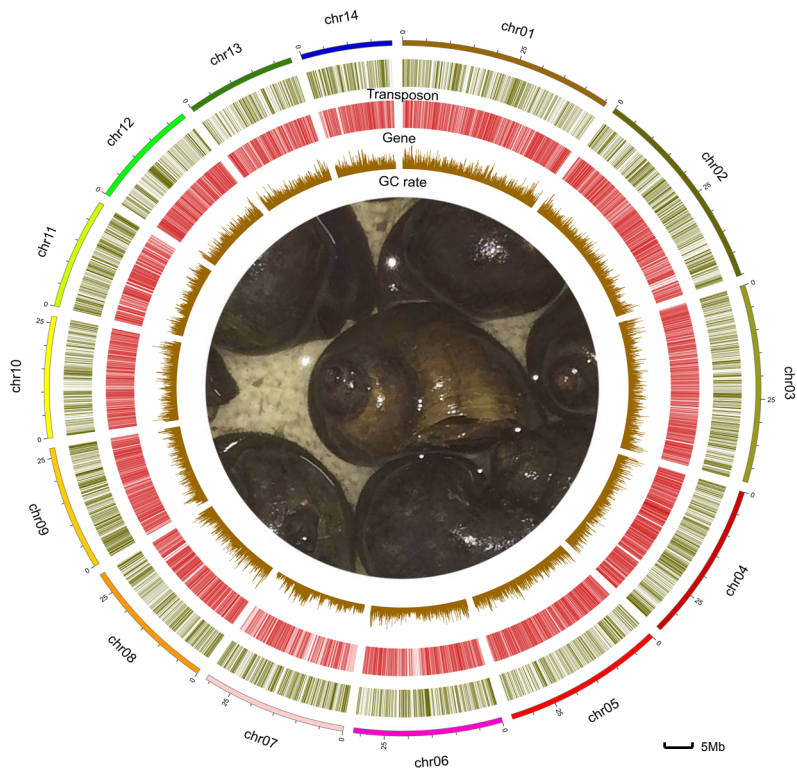**b**

[Click here to download Figure Fig.1.pdf](#)

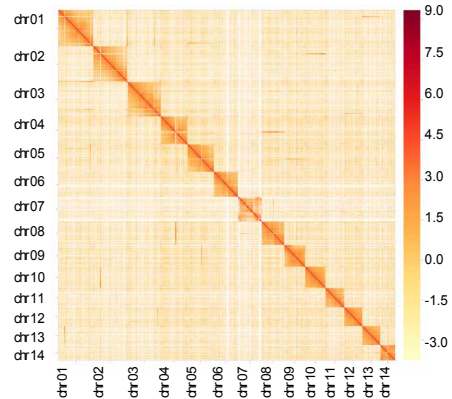**c**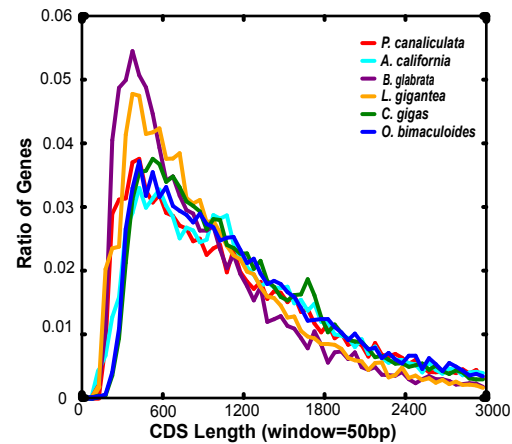

Figure

**a**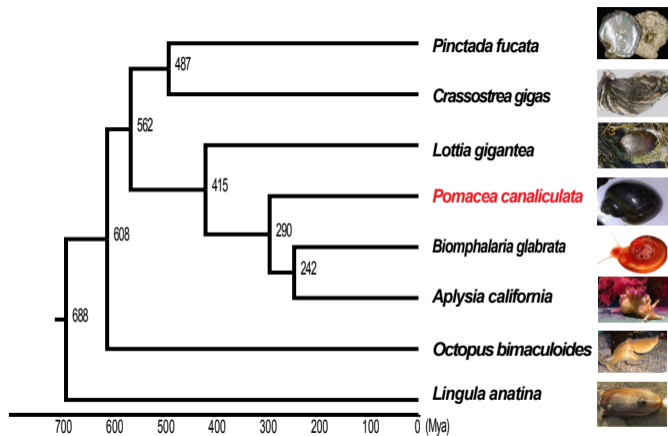
[Click here to download Figure Fig.2.pdf](#)
**b**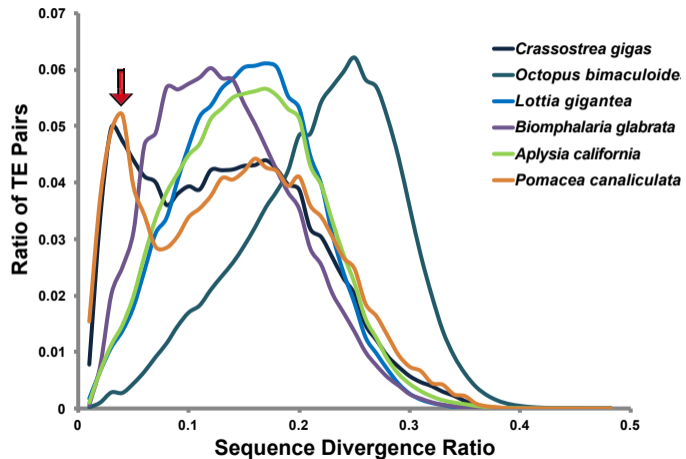

Figure

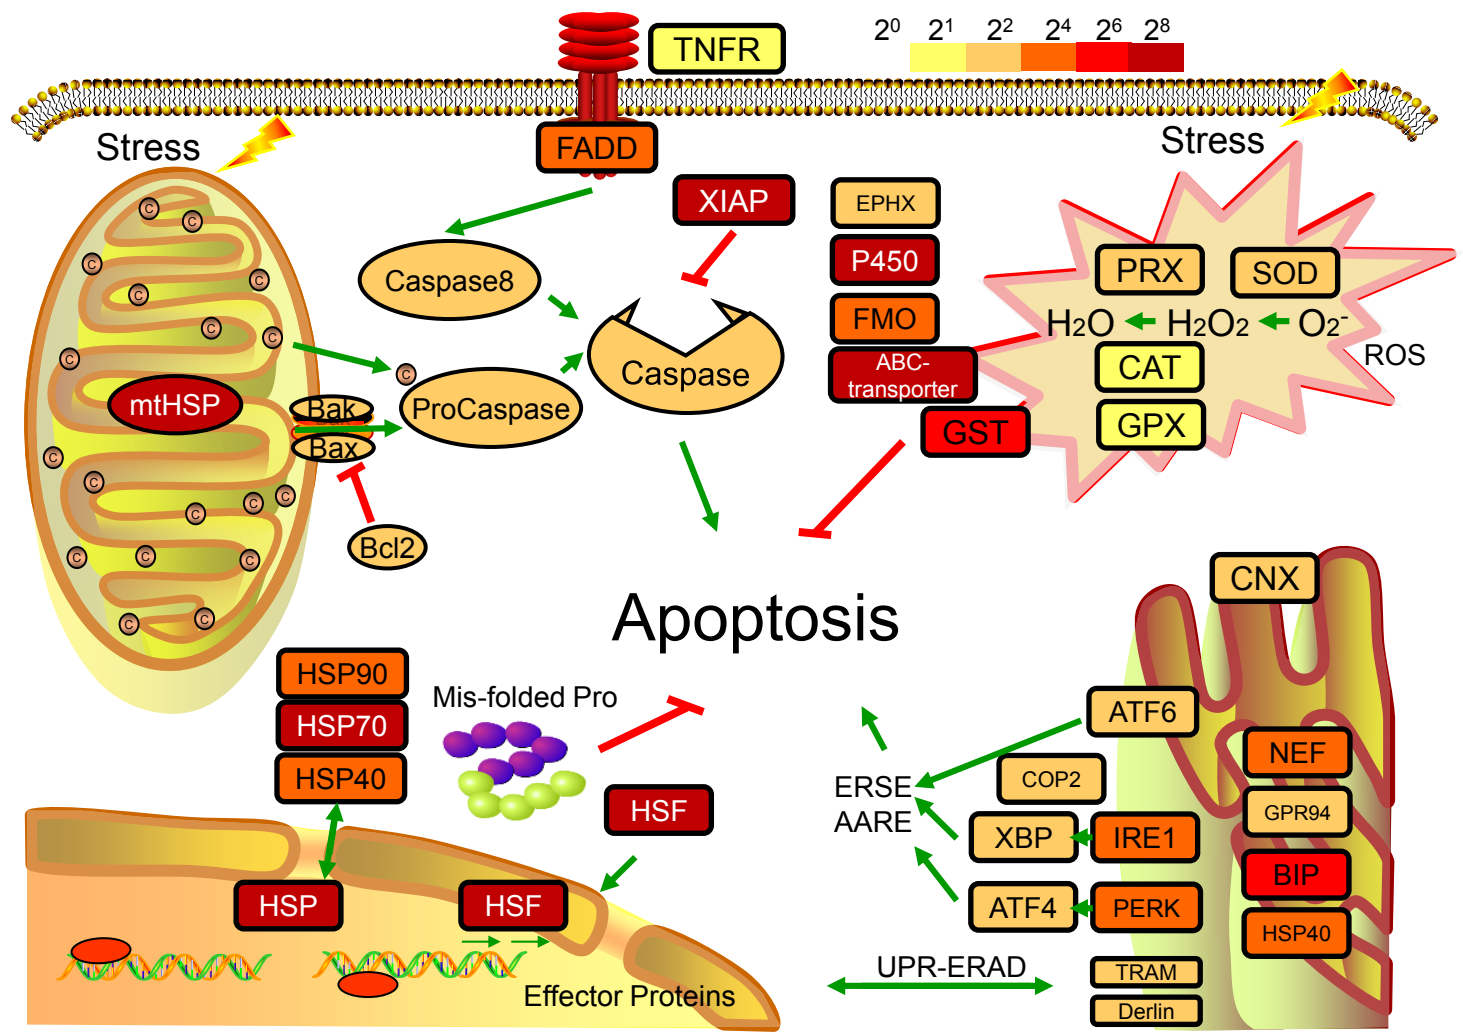

**a**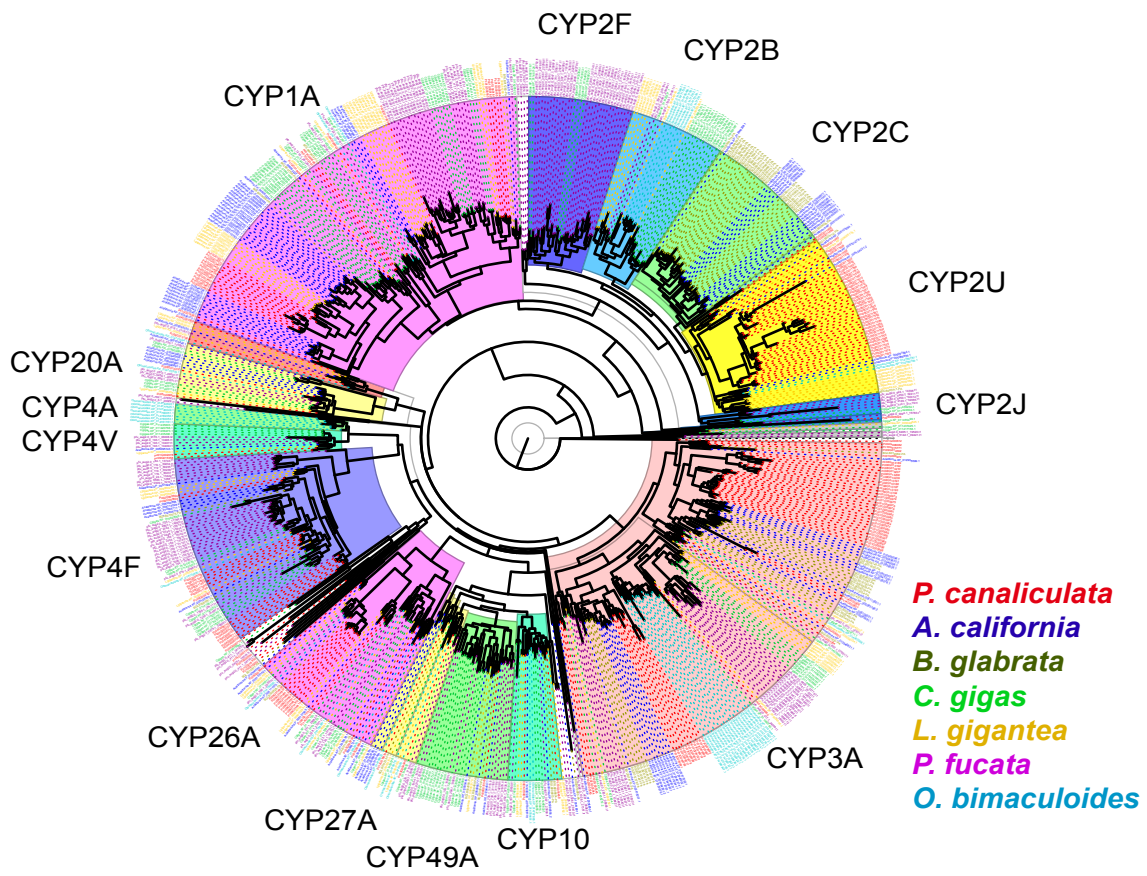**b**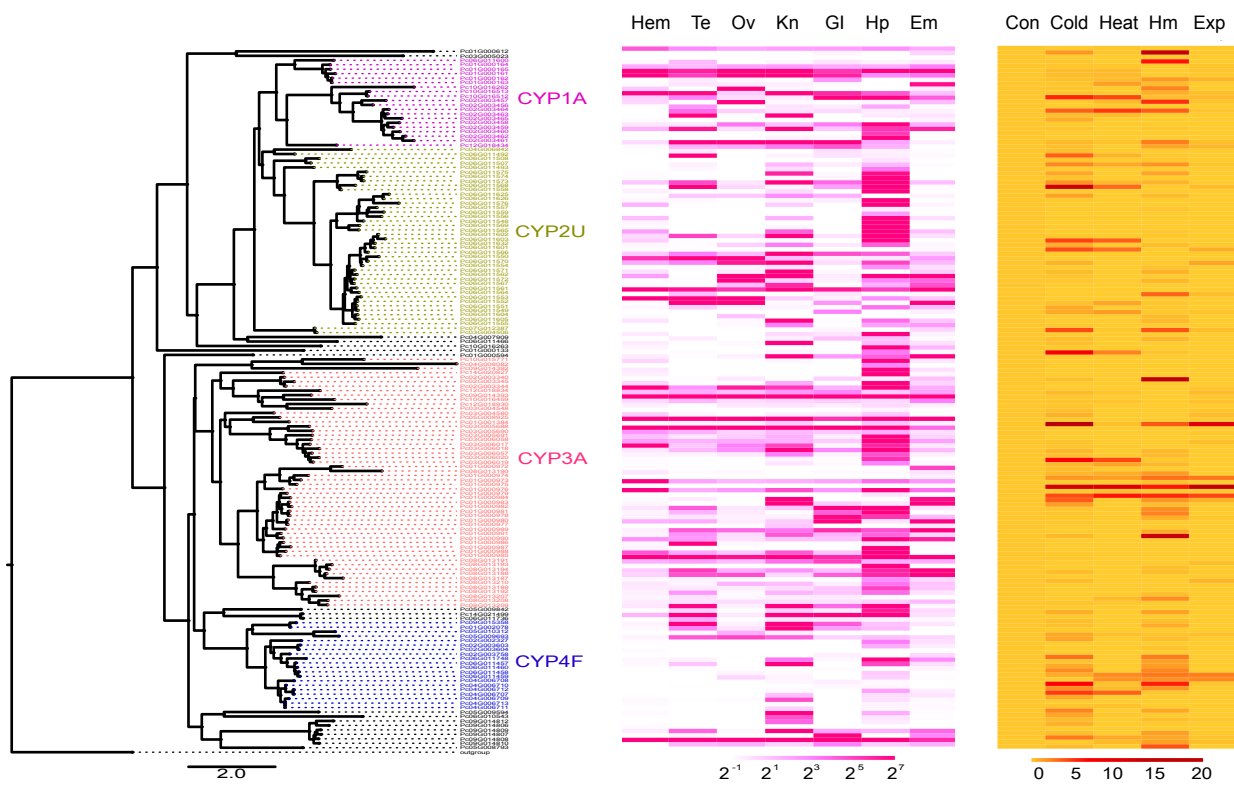

*P. canaliculata*

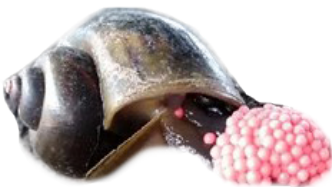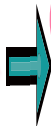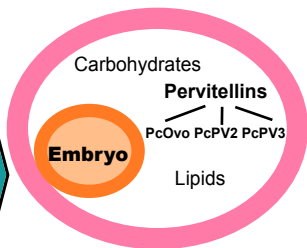

b

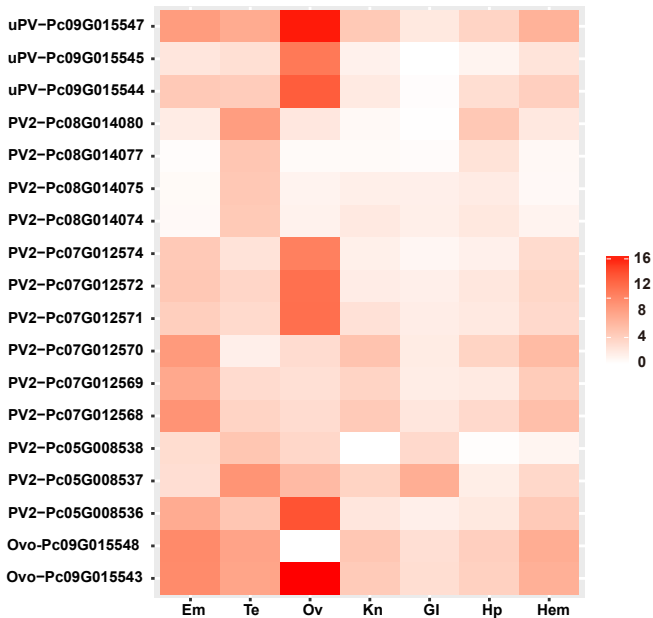



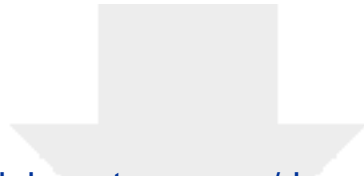

Click here to access/download  
**Supplementary Material**  
Supplemental Information.doc

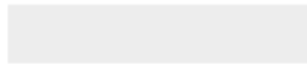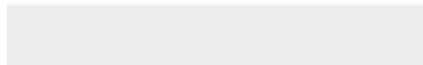

Dear Laurie and Scott,

We are delighted to submit our genome paper of golden apple snail to GigaScience. We appreciate any of your advices.

It was 8 years ago that I worked on the panda genome project in BGI, and I have always been grateful for Laurie's kind revision of that manuscript published in *Nature*. It was 6 years ago that I wrote a review paper on the sequence assembly algorithm, and I was in debt to Scott for helping me revise that manuscript later published on Briefings in Functional Genomics. Now I am working at Agricultural Genomics Institute, Chinese Academy of Agricultural Sciences, being a PI researcher in agricultural genomics, and focusing mainly in pest animals and microbiome.

The golden apple snail is an important worldwide invasive animal, listed in the top-100 worst invasive species. It has become a major pest in the rice field, causing huge economic loss each year but lack of efficient preventing approaches. By PacBio sequencing and Hi-C technology, we have assembled the genome into 14 chromosomes, which is the best available genome sequence in Molluscs. Key findings include the recent explosion of DNA/hAT-Charlie TEs, the expansion of P450 gene family and the constitution of cellular homeostasis system, contributing to the ecological plasticity in the stress adaptation, as well as the perivitellin gene expansion and high transcriptional level in ovary that promotes the function of nutrients supplying and defense ability in the eggs. We also analyzed the gut metagenome and found rich genes for food digestion and xenobiotics degradation. The golden apple snail possesses potential to be a model organism of molluscs, and we believe that with a high-quality reference genome, it will become more important in molluscs researches.

Thank you for your consideration. We would really appreciate if you could accelerate the processing of our manuscript given a highly competitive situation.

Best wishes,

Wei Fan
